# Supplementary material
Source: publisher figshare collection journal article supplement (https://acs.figshare.com/ndownloader/files/3845911)
Supplement: Supplementary file 1 [file 3845911]

data_5 

# 1. Submission Details

_publ_contact_author_name   'Prof. Dr. Holger Braunschweig'
_publ_contact_author_address
; Institut f\"ur Anorganische Chemie
Universit\"at W\"urzburg
Am Hubland
97074 W\"urzburg, Germany
;
_publ_contact_author_email         'H.Braunschweig@mail.uni-wuerzburg.de'
_publ_contact_author_fax           +49-931-3184623
_publ_contact_author_phone         +49-931-3185260

_publ_requested_journal            ?
_publ_requested_category           ?
_publ_requested_coeditor_name      ?

_publ_contact_letter
; ?
;

_publ_section_title
;?
;

_publ_section_abstract
;?
;

loop_
_publ_author_name
_publ_author_address
      'Braunschweig, Holger'
;     Institut f\"ur Anorganische Chemie
      Universit\"at W\"urzburg
      Am Hubland
      D-97074 W\"urzburg, Germany
;
      'Dueck, Klaus'
;     Institut f\"ur Anorganische Chemie
      Universit\"at W\"urzburg
      Am Hubland
      D-97074 W\"urzburg, Germany
;
      'Radacki, Krzysztof'
;     Institut f\"ur Anorganische Chemie
      Universit\"at Wuerzburg
      Am Hubland
      D-97074 W\"urzburg, Germany
;
 
_audit_creation_method            SHELXL-97 
_chemical_name_systematic 
; 
?
; 
_chemical_name_common             
;
?
; 
_chemical_melting_point           ? 
_chemical_formula_moiety          
'C20 H28 Sn V'
 
_chemical_formula_sum 
 'C20 H28 Sn V'
_chemical_formula_weight          438.05 
 
loop_ 
 _atom_type_symbol 
 _atom_type_description 
 _atom_type_scat_dispersion_real 
 _atom_type_scat_dispersion_imag 
 _atom_type_scat_source 
 'C'  'C'   0.0033   0.0016 
 'International Tables Vol C Tables 4.2.6.8 and 6.1.1.4' 
 'H'  'H'   0.0000   0.0000 
 'International Tables Vol C Tables 4.2.6.8 and 6.1.1.4' 
 'V'  'V'   0.3005   0.5294 
 'International Tables Vol C Tables 4.2.6.8 and 6.1.1.4' 
 'Sn'  'Sn'  -0.6537   1.4246 
 'International Tables Vol C Tables 4.2.6.8 and 6.1.1.4' 
 
_symmetry_cell_setting            'Monoclinic' 
_symmetry_space_group_name_H-M    'C2/c'
_symmetry_space_group_name_Hall   '-C 2yc' 
 
loop_ 
 _symmetry_equiv_pos_as_xyz 
 'x, y, z' 
 '-x, y, -z+1/2' 
 'x+1/2, y+1/2, z' 
 '-x+1/2, y+1/2, -z+1/2' 
 '-x, -y, -z' 
 'x, -y, z-1/2' 
 '-x+1/2, -y+1/2, -z' 
 'x+1/2, -y+1/2, z-1/2' 
 
_cell_length_a                    12.5094(12) 
_cell_length_b                    9.8617(9) 
_cell_length_c                    15.3826(15) 
_cell_angle_alpha                 90.00 
_cell_angle_beta                  107.849(4) 
_cell_angle_gamma                 90.00 
_cell_volume                      1806.3(3) 
_cell_formula_units_Z             4 
_cell_measurement_temperature     108(2) 
_cell_measurement_reflns_used     7704 
_cell_measurement_theta_min       2.68 
_cell_measurement_theta_max       28.22 
 
_exptl_crystal_description        'block' 
_exptl_crystal_colour             'orange' 
_exptl_crystal_size_max           0.24 
_exptl_crystal_size_mid           0.12 
_exptl_crystal_size_min           0.04 
_exptl_crystal_density_meas       ? 
_exptl_crystal_density_diffrn     1.611 
_exptl_crystal_density_method     'not measured' 
_exptl_crystal_F_000              884 
_exptl_absorpt_coefficient_mu     1.895 
_exptl_absorpt_correction_type    'multi-scan' 
_exptl_absorpt_correction_T_min   0.6529
_exptl_absorpt_correction_T_max   0.7457
_exptl_absorpt_process_details    'Sadabs 2008/1 (Bruker 2008)' 
 
_exptl_special_details 
; 
 The crystal was immersed in a film of perfluoropolyether oil, mounted
on a a glass fiber and transferred to stream of cold nitrogen. 
; 
 
_diffrn_ambient_temperature       108(2) 
_diffrn_radiation_wavelength      0.71073 
_diffrn_radiation_type            MoK\a 
_diffrn_radiation_source          'rotating anode' 
_diffrn_radiation_monochromator   'multi-layer mirror' 
_diffrn_measurement_device_type   'Bruker X8-APEX II' 
_diffrn_measurement_method        '\f and \w scans' 
_diffrn_detector_area_resol_mean  8.333 
_diffrn_standards_number          ? 
_diffrn_standards_interval_count  ? 
_diffrn_standards_interval_time   ? 
_diffrn_standards_decay_%         ? 
_diffrn_reflns_number             45380 
_diffrn_reflns_av_R_equivalents   0.0305 
_diffrn_reflns_av_sigmaI/netI     0.0116 
_diffrn_reflns_limit_h_min        -16 
_diffrn_reflns_limit_h_max        16 
_diffrn_reflns_limit_k_min        -13 
_diffrn_reflns_limit_k_max        13 
_diffrn_reflns_limit_l_min        -20 
_diffrn_reflns_limit_l_max        20 
_diffrn_reflns_theta_min          2.68 
_diffrn_reflns_theta_max          28.32 
_reflns_number_total              2216 
_reflns_number_gt                 2163 
_reflns_threshold_expression      >2sigma(I) 
 
_computing_data_collection        'APEX2 ver. 2010.3 (Bruker AXS)' 
_computing_cell_refinement        'Saint+ ver. 7.68A (Bruker AXS)' 
_computing_data_reduction         'Saint+ ver. 7.68A (Bruker AXS)' 
_computing_structure_solution     'SHELXS-97 (Sheldrick, 1990)' 
_computing_structure_refinement   'SHELXL-97 (Sheldrick, 1997)' 
_computing_molecular_graphics     'XP ver. 5.1 (Bruker AXS, 1998)' 
_computing_publication_material   'SHELXL-97 (Sheldrick, 2008)' 
 
_refine_special_details 
; 
 Refinement of F^2^ against ALL reflections.  The weighted R-factor wR and 
 goodness of fit S are based on F^2^, conventional R-factors R are based 
 on F, with F set to zero for negative F^2^. The threshold expression of 
 F^2^ > 2sigma(F^2^) is used only for calculating R-factors(gt) etc. and is 
 not relevant to the choice of reflections for refinement.  R-factors based 
 on F^2^ are statistically about twice as large as those based on F, and R- 
 factors based on ALL data will be even larger. 
; 
 
_refine_ls_structure_factor_coef  Fsqd  
_refine_ls_matrix_type            full 
_refine_ls_weighting_scheme       calc  
_refine_ls_weighting_details 
 'calc w=1/[\s^2^(Fo^2^)+(0.0137P)^2^+1.4319P] where P=(Fo^2^+2Fc^2^)/3' 
_atom_sites_solution_primary      direct 
_atom_sites_solution_secondary    difmap 
_atom_sites_solution_hydrogens    geom 
_refine_ls_hydrogen_treatment     constr 
_refine_ls_extinction_method      none 
_refine_ls_extinction_coef        ? 
_refine_ls_number_reflns          2216 
_refine_ls_number_parameters      104 
_refine_ls_number_restraints      0 
_refine_ls_R_factor_all           0.0124 
_refine_ls_R_factor_gt            0.0118 
_refine_ls_wR_factor_ref          0.0313 
_refine_ls_wR_factor_gt           0.0310 
_refine_ls_goodness_of_fit_ref    1.122 
_refine_ls_restrained_S_all       1.122 
_refine_ls_shift/su_max           0.001 
_refine_ls_shift/su_mean          0.000 
 
loop_ 
 _atom_site_label 
 _atom_site_type_symbol 
 _atom_site_fract_x 
 _atom_site_fract_y 
 _atom_site_fract_z 
 _atom_site_U_iso_or_equiv 
 _atom_site_adp_type 
 _atom_site_occupancy 
 _atom_site_symmetry_multiplicity 
 _atom_site_calc_flag 
 _atom_site_refinement_flags 
 _atom_site_disorder_assembly 
 _atom_site_disorder_group 
V1 V 0.5000 0.63983(3) 0.7500 0.01131(6) Uani 1 2 d S . . 
C1_1 C 0.37584(9) 0.47567(11) 0.72305(8) 0.0133(2) Uani 1 1 d . . . 
C2_1 C 0.36446(9) 0.54839(12) 0.63978(8) 0.0145(2) Uani 1 1 d . . . 
H2_1 H 0.3678 0.4998 0.5873 0.017 Uiso 1 1 calc R . . 
C3_1 C 0.34834(10) 0.69149(11) 0.63384(8) 0.0160(2) Uani 1 1 d . . . 
H3_1 H 0.3413 0.7372 0.5780 0.019 Uiso 1 1 calc R . . 
C4_1 C 0.34287(9) 0.76525(12) 0.71101(8) 0.0161(2) Uani 1 1 d . . . 
H4_1 H 0.3324 0.8607 0.7072 0.019 Uiso 1 1 calc R . . 
C5_1 C 0.35297(10) 0.69698(11) 0.79397(8) 0.0155(2) Uani 1 1 d . . . 
H5_1 H 0.3486 0.7466 0.8457 0.019 Uiso 1 1 calc R . . 
C6_1 C 0.36964(9) 0.55400(12) 0.80006(8) 0.0141(2) Uani 1 1 d . . . 
H6_1 H 0.3768 0.5094 0.8563 0.017 Uiso 1 1 calc R . . 
Sn1 Sn 0.5000 0.313062(10) 0.7500 0.01084(4) Uani 1 2 d S . . 
C1_2 C 0.48464(10) 0.19147(11) 0.62674(8) 0.0140(2) Uani 1 1 d . . . 
C2_2 C 0.36113(10) 0.14915(14) 0.58822(8) 0.0198(2) Uani 1 1 d . . . 
H2A_2 H 0.3138 0.2303 0.5735 0.030 Uiso 1 1 calc R . . 
H2B_2 H 0.3399 0.0950 0.6338 0.030 Uiso 1 1 calc R . . 
H2C_2 H 0.3508 0.0951 0.5328 0.030 Uiso 1 1 calc R . . 
C3_2 C 0.55853(10) 0.06488(12) 0.65108(8) 0.0182(2) Uani 1 1 d . . . 
H3A_2 H 0.5526 0.0131 0.5954 0.027 Uiso 1 1 calc R . . 
H3B_2 H 0.5335 0.0085 0.6936 0.027 Uiso 1 1 calc R . . 
H3C_2 H 0.6368 0.0920 0.6798 0.027 Uiso 1 1 calc R . . 
C4_2 C 0.52015(11) 0.27102(13) 0.55478(8) 0.0198(2) Uani 1 1 d . . . 
H4A_2 H 0.5100 0.2143 0.5005 0.030 Uiso 1 1 calc R . . 
H4B_2 H 0.5993 0.2969 0.5797 0.030 Uiso 1 1 calc R . . 
H4C_2 H 0.4739 0.3528 0.5380 0.030 Uiso 1 1 calc R . . 
 
loop_ 
 _atom_site_aniso_label 
 _atom_site_aniso_U_11 
 _atom_site_aniso_U_22 
 _atom_site_aniso_U_33 
 _atom_site_aniso_U_23 
 _atom_site_aniso_U_13 
 _atom_site_aniso_U_12 
V1 0.00840(12) 0.01196(13) 0.01385(12) 0.000 0.00385(10) 0.000 
C1_1 0.0081(5) 0.0142(5) 0.0176(5) -0.0016(4) 0.0039(4) -0.0012(4) 
C2_1 0.0102(5) 0.0182(5) 0.0148(5) -0.0021(4) 0.0030(4) 0.0006(4) 
C3_1 0.0103(5) 0.0188(6) 0.0177(6) 0.0030(4) 0.0027(4) 0.0014(4) 
C4_1 0.0102(5) 0.0134(5) 0.0241(6) -0.0001(4) 0.0043(4) 0.0016(4) 
C5_1 0.0105(5) 0.0173(6) 0.0201(6) -0.0040(4) 0.0067(4) -0.0004(4) 
C6_1 0.0104(5) 0.0170(5) 0.0162(5) -0.0001(4) 0.0059(4) -0.0004(4) 
Sn1 0.01171(6) 0.01070(6) 0.01078(6) 0.000 0.00443(4) 0.000 
C1_2 0.0139(5) 0.0151(5) 0.0129(5) -0.0013(4) 0.0038(4) 0.0013(4) 
C2_2 0.0137(6) 0.0268(6) 0.0173(6) -0.0036(5) 0.0022(4) 0.0007(5) 
C3_2 0.0168(6) 0.0175(5) 0.0200(6) -0.0023(4) 0.0048(5) 0.0036(4) 
C4_2 0.0263(6) 0.0206(6) 0.0154(5) -0.0019(5) 0.0106(5) 0.0011(5) 
 
_geom_special_details 
; 
 All esds (except the esd in the dihedral angle between two l.s. planes) 
 are estimated using the full covariance matrix.  The cell esds are taken 
 into account individually in the estimation of esds in distances, angles 
 and torsion angles; correlations between esds in cell parameters are only 
 used when they are defined by crystal symmetry.  An approximate (isotropic) 
 treatment of cell esds is used for estimating esds involving l.s. planes. 
; 
 
loop_ 
 _geom_bond_atom_site_label_1 
 _geom_bond_atom_site_label_2 
 _geom_bond_distance 
 _geom_bond_site_symmetry_2 
 _geom_bond_publ_flag 
V1 C6_1 2.1768(11) . ? 
V1 C6_1 2.1768(11) 2_656 ? 
V1 C2_1 2.1910(11) . ? 
V1 C2_1 2.1910(11) 2_656 ? 
V1 C1_1 2.1932(11) . ? 
V1 C1_1 2.1932(11) 2_656 ? 
V1 C5_1 2.2183(12) 2_656 ? 
V1 C5_1 2.2183(12) . ? 
V1 C3_1 2.2302(12) 2_656 ? 
V1 C3_1 2.2302(12) . ? 
V1 C4_1 2.2429(11) 2_656 ? 
V1 C4_1 2.2429(11) . ? 
C1_1 C6_1 1.4360(16) . ? 
C1_1 C2_1 1.4365(16) . ? 
C1_1 Sn1 2.1820(11) . ? 
C2_1 C3_1 1.4245(16) . ? 
C2_1 H2_1 0.9500 . ? 
C3_1 C4_1 1.4117(17) . ? 
C3_1 H3_1 0.9500 . ? 
C4_1 C5_1 1.4138(17) . ? 
C4_1 H4_1 0.9500 . ? 
C5_1 C6_1 1.4243(16) . ? 
C5_1 H5_1 0.9500 . ? 
C6_1 H6_1 0.9500 . ? 
Sn1 C1_1 2.1820(11) 2_656 ? 
Sn1 C1_2 2.2014(11) 2_656 ? 
Sn1 C1_2 2.2014(11) . ? 
C1_2 C4_2 1.5297(16) . ? 
C1_2 C3_2 1.5301(15) . ? 
C1_2 C2_2 1.5333(16) . ? 
C2_2 H2A_2 0.9800 . ? 
C2_2 H2B_2 0.9800 . ? 
C2_2 H2C_2 0.9800 . ? 
C3_2 H3A_2 0.9800 . ? 
C3_2 H3B_2 0.9800 . ? 
C3_2 H3C_2 0.9800 . ? 
C4_2 H4A_2 0.9800 . ? 
C4_2 H4B_2 0.9800 . ? 
C4_2 H4C_2 0.9800 . ? 
 
loop_ 
 _geom_angle_atom_site_label_1 
 _geom_angle_atom_site_label_2 
 _geom_angle_atom_site_label_3 
 _geom_angle 
 _geom_angle_site_symmetry_1 
 _geom_angle_site_symmetry_3 
 _geom_angle_publ_flag 
C6_1 V1 C6_1 134.23(6) . 2_656 ? 
C6_1 V1 C2_1 68.14(4) . . ? 
C6_1 V1 C2_1 92.99(4) 2_656 . ? 
C6_1 V1 C2_1 92.99(4) . 2_656 ? 
C6_1 V1 C2_1 68.14(4) 2_656 2_656 ? 
C2_1 V1 C2_1 131.39(6) . 2_656 ? 
C6_1 V1 C1_1 38.37(4) . . ? 
C6_1 V1 C1_1 102.12(4) 2_656 . ? 
C2_1 V1 C1_1 38.25(4) . . ? 
C2_1 V1 C1_1 100.23(4) 2_656 . ? 
C6_1 V1 C1_1 102.12(4) . 2_656 ? 
C6_1 V1 C1_1 38.37(4) 2_656 2_656 ? 
C2_1 V1 C1_1 100.23(4) . 2_656 ? 
C2_1 V1 C1_1 38.25(4) 2_656 2_656 ? 
C1_1 V1 C1_1 84.85(6) . 2_656 ? 
C6_1 V1 C5_1 171.01(4) . 2_656 ? 
C6_1 V1 C5_1 37.80(4) 2_656 2_656 ? 
C2_1 V1 C5_1 112.70(4) . 2_656 ? 
C2_1 V1 C5_1 79.82(4) 2_656 2_656 ? 
C1_1 V1 C5_1 137.32(4) . 2_656 ? 
C1_1 V1 C5_1 68.89(4) 2_656 2_656 ? 
C6_1 V1 C5_1 37.80(4) . . ? 
C6_1 V1 C5_1 171.01(5) 2_656 . ? 
C2_1 V1 C5_1 79.82(4) . . ? 
C2_1 V1 C5_1 112.70(4) 2_656 . ? 
C1_1 V1 C5_1 68.89(4) . . ? 
C1_1 V1 C5_1 137.32(4) 2_656 . ? 
C5_1 V1 C5_1 150.56(6) 2_656 . ? 
C6_1 V1 C3_1 110.55(4) . 2_656 ? 
C6_1 V1 C3_1 80.02(4) 2_656 2_656 ? 
C2_1 V1 C3_1 168.68(4) . 2_656 ? 
C2_1 V1 C3_1 37.58(4) 2_656 2_656 ? 
C1_1 V1 C3_1 134.37(4) . 2_656 ? 
C1_1 V1 C3_1 68.77(4) 2_656 2_656 ? 
C5_1 V1 C3_1 66.74(5) 2_656 2_656 ? 
C5_1 V1 C3_1 106.19(4) . 2_656 ? 
C6_1 V1 C3_1 80.02(4) . . ? 
C6_1 V1 C3_1 110.55(4) 2_656 . ? 
C2_1 V1 C3_1 37.58(4) . . ? 
C2_1 V1 C3_1 168.68(5) 2_656 . ? 
C1_1 V1 C3_1 68.77(4) . . ? 
C1_1 V1 C3_1 134.37(4) 2_656 . ? 
C5_1 V1 C3_1 106.19(4) 2_656 . ? 
C5_1 V1 C3_1 66.74(5) . . ? 
C3_1 V1 C3_1 153.59(6) 2_656 . ? 
C6_1 V1 C4_1 144.10(4) . 2_656 ? 
C6_1 V1 C4_1 67.60(4) 2_656 2_656 ? 
C2_1 V1 C4_1 147.23(4) . 2_656 ? 
C2_1 V1 C4_1 67.24(4) 2_656 2_656 ? 
C1_1 V1 C4_1 165.79(4) . 2_656 ? 
C1_1 V1 C4_1 81.07(4) 2_656 2_656 ? 
C5_1 V1 C4_1 36.95(4) 2_656 2_656 ? 
C5_1 V1 C4_1 121.26(4) . 2_656 ? 
C3_1 V1 C4_1 36.79(4) 2_656 2_656 ? 
C3_1 V1 C4_1 123.29(4) . 2_656 ? 
C6_1 V1 C4_1 67.60(4) . . ? 
C6_1 V1 C4_1 144.10(4) 2_656 . ? 
C2_1 V1 C4_1 67.24(4) . . ? 
C2_1 V1 C4_1 147.23(4) 2_656 . ? 
C1_1 V1 C4_1 81.07(4) . . ? 
C1_1 V1 C4_1 165.79(4) 2_656 . ? 
C5_1 V1 C4_1 121.26(4) 2_656 . ? 
C5_1 V1 C4_1 36.95(4) . . ? 
C3_1 V1 C4_1 123.29(4) 2_656 . ? 
C3_1 V1 C4_1 36.79(4) . . ? 
C4_1 V1 C4_1 113.07(6) 2_656 . ? 
C6_1 C1_1 C2_1 116.83(10) . . ? 
C6_1 C1_1 Sn1 116.99(8) . . ? 
C2_1 C1_1 Sn1 113.99(8) . . ? 
C6_1 C1_1 V1 70.20(6) . . ? 
C2_1 C1_1 V1 70.79(6) . . ? 
Sn1 C1_1 V1 94.88(4) . . ? 
C3_1 C2_1 C1_1 121.68(11) . . ? 
C3_1 C2_1 V1 72.70(7) . . ? 
C1_1 C2_1 V1 70.96(6) . . ? 
C3_1 C2_1 H2_1 119.2 . . ? 
C1_1 C2_1 H2_1 119.2 . . ? 
V1 C2_1 H2_1 129.8 . . ? 
C4_1 C3_1 C2_1 119.93(11) . . ? 
C4_1 C3_1 V1 72.09(7) . . ? 
C2_1 C3_1 V1 69.72(6) . . ? 
C4_1 C3_1 H3_1 120.0 . . ? 
C2_1 C3_1 H3_1 120.0 . . ? 
V1 C3_1 H3_1 130.8 . . ? 
C3_1 C4_1 C5_1 119.98(10) . . ? 
C3_1 C4_1 V1 71.11(7) . . ? 
C5_1 C4_1 V1 70.58(6) . . ? 
C3_1 C4_1 H4_1 120.0 . . ? 
C5_1 C4_1 H4_1 120.0 . . ? 
V1 C4_1 H4_1 131.0 . . ? 
C4_1 C5_1 C6_1 120.10(11) . . ? 
C4_1 C5_1 V1 72.47(7) . . ? 
C6_1 C5_1 V1 69.52(6) . . ? 
C4_1 C5_1 H5_1 119.9 . . ? 
C6_1 C5_1 H5_1 119.9 . . ? 
V1 C5_1 H5_1 130.7 . . ? 
C5_1 C6_1 C1_1 121.48(11) . . ? 
C5_1 C6_1 V1 72.68(7) . . ? 
C1_1 C6_1 V1 71.44(6) . . ? 
C5_1 C6_1 H6_1 119.3 . . ? 
C1_1 C6_1 H6_1 119.3 . . ? 
V1 C6_1 H6_1 129.1 . . ? 
C1_1 Sn1 C1_1 85.40(6) 2_656 . ? 
C1_1 Sn1 C1_2 111.56(4) 2_656 2_656 ? 
C1_1 Sn1 C1_2 115.67(4) . 2_656 ? 
C1_1 Sn1 C1_2 115.66(4) 2_656 . ? 
C1_1 Sn1 C1_2 111.56(4) . . ? 
C1_2 Sn1 C1_2 113.99(6) 2_656 . ? 
C4_2 C1_2 C3_2 107.93(10) . . ? 
C4_2 C1_2 C2_2 109.98(10) . . ? 
C3_2 C1_2 C2_2 109.52(10) . . ? 
C4_2 C1_2 Sn1 112.08(7) . . ? 
C3_2 C1_2 Sn1 110.30(8) . . ? 
C2_2 C1_2 Sn1 107.02(8) . . ? 
C1_2 C2_2 H2A_2 109.5 . . ? 
C1_2 C2_2 H2B_2 109.5 . . ? 
H2A_2 C2_2 H2B_2 109.5 . . ? 
C1_2 C2_2 H2C_2 109.5 . . ? 
H2A_2 C2_2 H2C_2 109.5 . . ? 
H2B_2 C2_2 H2C_2 109.5 . . ? 
C1_2 C3_2 H3A_2 109.5 . . ? 
C1_2 C3_2 H3B_2 109.5 . . ? 
H3A_2 C3_2 H3B_2 109.5 . . ? 
C1_2 C3_2 H3C_2 109.5 . . ? 
H3A_2 C3_2 H3C_2 109.5 . . ? 
H3B_2 C3_2 H3C_2 109.5 . . ? 
C1_2 C4_2 H4A_2 109.5 . . ? 
C1_2 C4_2 H4B_2 109.5 . . ? 
H4A_2 C4_2 H4B_2 109.5 . . ? 
C1_2 C4_2 H4C_2 109.5 . . ? 
H4A_2 C4_2 H4C_2 109.5 . . ? 
H4B_2 C4_2 H4C_2 109.5 . . ? 
 
loop_ 
 _geom_torsion_atom_site_label_1 
 _geom_torsion_atom_site_label_2 
 _geom_torsion_atom_site_label_3 
 _geom_torsion_atom_site_label_4 
 _geom_torsion 
 _geom_torsion_site_symmetry_1 
 _geom_torsion_site_symmetry_2 
 _geom_torsion_site_symmetry_3 
 _geom_torsion_site_symmetry_4 
 _geom_torsion_publ_flag 
C6_1 V1 C1_1 C6_1 151.42(6) 2_656 . . . ? 
C2_1 V1 C1_1 C6_1 -129.31(10) . . . . ? 
C2_1 V1 C1_1 C6_1 81.80(7) 2_656 . . . ? 
C1_1 V1 C1_1 C6_1 116.97(8) 2_656 . . . ? 
C5_1 V1 C1_1 C6_1 167.83(7) 2_656 . . . ? 
C5_1 V1 C1_1 C6_1 -28.73(7) . . . . ? 
C3_1 V1 C1_1 C6_1 63.59(9) 2_656 . . . ? 
C3_1 V1 C1_1 C6_1 -101.02(7) . . . . ? 
C4_1 V1 C1_1 C6_1 109.14(18) 2_656 . . . ? 
C4_1 V1 C1_1 C6_1 -64.97(7) . . . . ? 
C6_1 V1 C1_1 C2_1 129.31(10) . . . . ? 
C6_1 V1 C1_1 C2_1 -79.27(7) 2_656 . . . ? 
C2_1 V1 C1_1 C2_1 -148.89(6) 2_656 . . . ? 
C1_1 V1 C1_1 C2_1 -113.73(8) 2_656 . . . ? 
C5_1 V1 C1_1 C2_1 -62.86(9) 2_656 . . . ? 
C5_1 V1 C1_1 C2_1 100.58(7) . . . . ? 
C3_1 V1 C1_1 C2_1 -167.10(7) 2_656 . . . ? 
C3_1 V1 C1_1 C2_1 28.29(6) . . . . ? 
C4_1 V1 C1_1 C2_1 -121.56(17) 2_656 . . . ? 
C4_1 V1 C1_1 C2_1 64.33(7) . . . . ? 
C6_1 V1 C1_1 Sn1 -116.97(8) . . . . ? 
C6_1 V1 C1_1 Sn1 34.46(5) 2_656 . . . ? 
C2_1 V1 C1_1 Sn1 113.73(8) . . . . ? 
C2_1 V1 C1_1 Sn1 -35.17(5) 2_656 . . . ? 
C1_1 V1 C1_1 Sn1 0.0 2_656 . . . ? 
C5_1 V1 C1_1 Sn1 50.86(8) 2_656 . . . ? 
C5_1 V1 C1_1 Sn1 -145.70(6) . . . . ? 
C3_1 V1 C1_1 Sn1 -53.37(7) 2_656 . . . ? 
C3_1 V1 C1_1 Sn1 142.02(5) . . . . ? 
C4_1 V1 C1_1 Sn1 -7.8(2) 2_656 . . . ? 
C4_1 V1 C1_1 Sn1 178.06(5) . . . . ? 
C6_1 C1_1 C2_1 C3_1 0.30(16) . . . . ? 
Sn1 C1_1 C2_1 C3_1 -141.13(9) . . . . ? 
V1 C1_1 C2_1 C3_1 -54.37(10) . . . . ? 
C6_1 C1_1 C2_1 V1 54.67(9) . . . . ? 
Sn1 C1_1 C2_1 V1 -86.76(6) . . . . ? 
C6_1 V1 C2_1 C3_1 102.42(8) . . . . ? 
C6_1 V1 C2_1 C3_1 -120.56(7) 2_656 . . . ? 
C2_1 V1 C2_1 C3_1 176.24(8) 2_656 . . . ? 
C1_1 V1 C2_1 C3_1 133.58(10) . . . . ? 
C1_1 V1 C2_1 C3_1 -158.52(7) 2_656 . . . ? 
C5_1 V1 C2_1 C3_1 -87.25(7) 2_656 . . . ? 
C5_1 V1 C2_1 C3_1 64.88(7) . . . . ? 
C3_1 V1 C2_1 C3_1 -172.01(16) 2_656 . . . ? 
C4_1 V1 C2_1 C3_1 -69.15(11) 2_656 . . . ? 
C4_1 V1 C2_1 C3_1 28.50(7) . . . . ? 
C6_1 V1 C2_1 C1_1 -31.16(6) . . . . ? 
C6_1 V1 C2_1 C1_1 105.86(7) 2_656 . . . ? 
C2_1 V1 C2_1 C1_1 42.66(6) 2_656 . . . ? 
C1_1 V1 C2_1 C1_1 67.90(8) 2_656 . . . ? 
C5_1 V1 C2_1 C1_1 139.17(6) 2_656 . . . ? 
C5_1 V1 C2_1 C1_1 -68.70(7) . . . . ? 
C3_1 V1 C2_1 C1_1 54.4(2) 2_656 . . . ? 
C3_1 V1 C2_1 C1_1 -133.58(10) . . . . ? 
C4_1 V1 C2_1 C1_1 157.27(8) 2_656 . . . ? 
C4_1 V1 C2_1 C1_1 -105.08(7) . . . . ? 
C1_1 C2_1 C3_1 C4_1 -0.19(17) . . . . ? 
V1 C2_1 C3_1 C4_1 -53.77(10) . . . . ? 
C1_1 C2_1 C3_1 V1 53.58(10) . . . . ? 
C6_1 V1 C3_1 C4_1 65.74(7) . . . . ? 
C6_1 V1 C3_1 C4_1 -160.59(7) 2_656 . . . ? 
C2_1 V1 C3_1 C4_1 132.72(10) . . . . ? 
C2_1 V1 C3_1 C4_1 118.2(2) 2_656 . . . ? 
C1_1 V1 C3_1 C4_1 103.96(7) . . . . ? 
C1_1 V1 C3_1 C4_1 162.99(7) 2_656 . . . ? 
C5_1 V1 C3_1 C4_1 -120.93(7) 2_656 . . . ? 
C5_1 V1 C3_1 C4_1 28.64(7) . . . . ? 
C3_1 V1 C3_1 C4_1 -50.80(6) 2_656 . . . ? 
C4_1 V1 C3_1 C4_1 -84.53(10) 2_656 . . . ? 
C6_1 V1 C3_1 C2_1 -66.97(7) . . . . ? 
C6_1 V1 C3_1 C2_1 66.69(8) 2_656 . . . ? 
C2_1 V1 C3_1 C2_1 -14.5(3) 2_656 . . . ? 
C1_1 V1 C3_1 C2_1 -28.76(7) . . . . ? 
C1_1 V1 C3_1 C2_1 30.27(10) 2_656 . . . ? 
C5_1 V1 C3_1 C2_1 106.35(7) 2_656 . . . ? 
C5_1 V1 C3_1 C2_1 -104.07(8) . . . . ? 
C3_1 V1 C3_1 C2_1 176.48(7) 2_656 . . . ? 
C4_1 V1 C3_1 C2_1 142.76(7) 2_656 . . . ? 
C4_1 V1 C3_1 C2_1 -132.72(10) . . . . ? 
C2_1 C3_1 C4_1 C5_1 -0.24(17) . . . . ? 
V1 C3_1 C4_1 C5_1 -52.91(10) . . . . ? 
C2_1 C3_1 C4_1 V1 52.67(10) . . . . ? 
C6_1 V1 C4_1 C3_1 -103.78(7) . . . . ? 
C6_1 V1 C4_1 C3_1 32.04(11) 2_656 . . . ? 
C2_1 V1 C4_1 C3_1 -29.07(7) . . . . ? 
C2_1 V1 C4_1 C3_1 -161.37(8) 2_656 . . . ? 
C1_1 V1 C4_1 C3_1 -66.31(7) . . . . ? 
C1_1 V1 C4_1 C3_1 -58.4(2) 2_656 . . . ? 
C5_1 V1 C4_1 C3_1 74.51(8) 2_656 . . . ? 
C5_1 V1 C4_1 C3_1 -132.89(10) . . . . ? 
C3_1 V1 C4_1 C3_1 155.65(6) 2_656 . . . ? 
C4_1 V1 C4_1 C3_1 115.26(7) 2_656 . . . ? 
C6_1 V1 C4_1 C5_1 29.11(7) . . . . ? 
C6_1 V1 C4_1 C5_1 164.93(8) 2_656 . . . ? 
C2_1 V1 C4_1 C5_1 103.82(7) . . . . ? 
C2_1 V1 C4_1 C5_1 -28.48(11) 2_656 . . . ? 
C1_1 V1 C4_1 C5_1 66.58(7) . . . . ? 
C1_1 V1 C4_1 C5_1 74.47(19) 2_656 . . . ? 
C5_1 V1 C4_1 C5_1 -152.60(6) 2_656 . . . ? 
C3_1 V1 C4_1 C5_1 -71.46(8) 2_656 . . . ? 
C3_1 V1 C4_1 C5_1 132.89(10) . . . . ? 
C4_1 V1 C4_1 C5_1 -111.85(7) 2_656 . . . ? 
C3_1 C4_1 C5_1 C6_1 0.55(17) . . . . ? 
V1 C4_1 C5_1 C6_1 -52.61(10) . . . . ? 
C3_1 C4_1 C5_1 V1 53.16(10) . . . . ? 
C6_1 V1 C5_1 C4_1 -132.80(10) . . . . ? 
C2_1 V1 C5_1 C4_1 -65.48(7) . . . . ? 
C2_1 V1 C5_1 C4_1 163.75(7) 2_656 . . . ? 
C1_1 V1 C5_1 C4_1 -103.67(7) . . . . ? 
C1_1 V1 C5_1 C4_1 -159.58(7) 2_656 . . . ? 
C5_1 V1 C5_1 C4_1 53.18(6) 2_656 . . . ? 
C3_1 V1 C5_1 C4_1 124.38(7) 2_656 . . . ? 
C3_1 V1 C5_1 C4_1 -28.53(7) . . . . ? 
C4_1 V1 C5_1 C4_1 87.44(9) 2_656 . . . ? 
C2_1 V1 C5_1 C6_1 67.32(7) . . . . ? 
C2_1 V1 C5_1 C6_1 -63.45(8) 2_656 . . . ? 
C1_1 V1 C5_1 C6_1 29.13(7) . . . . ? 
C1_1 V1 C5_1 C6_1 -26.78(10) 2_656 . . . ? 
C5_1 V1 C5_1 C6_1 -174.02(7) 2_656 . . . ? 
C3_1 V1 C5_1 C6_1 -102.82(7) 2_656 . . . ? 
C3_1 V1 C5_1 C6_1 104.27(7) . . . . ? 
C4_1 V1 C5_1 C6_1 -139.76(7) 2_656 . . . ? 
C4_1 V1 C5_1 C6_1 132.80(10) . . . . ? 
C4_1 C5_1 C6_1 C1_1 -0.44(17) . . . . ? 
V1 C5_1 C6_1 C1_1 -54.41(10) . . . . ? 
C4_1 C5_1 C6_1 V1 53.97(10) . . . . ? 
C2_1 C1_1 C6_1 C5_1 0.01(16) . . . . ? 
Sn1 C1_1 C6_1 C5_1 140.27(9) . . . . ? 
V1 C1_1 C6_1 C5_1 54.98(10) . . . . ? 
C2_1 C1_1 C6_1 V1 -54.97(9) . . . . ? 
Sn1 C1_1 C6_1 V1 85.29(6) . . . . ? 
C6_1 V1 C6_1 C5_1 -173.72(7) 2_656 . . . ? 
C2_1 V1 C6_1 C5_1 -101.91(8) . . . . ? 
C2_1 V1 C6_1 C5_1 124.27(7) 2_656 . . . ? 
C1_1 V1 C6_1 C5_1 -132.98(10) . . . . ? 
C1_1 V1 C6_1 C5_1 161.80(7) 2_656 . . . ? 
C3_1 V1 C6_1 C5_1 90.16(7) 2_656 . . . ? 
C3_1 V1 C6_1 C5_1 -64.70(7) . . . . ? 
C4_1 V1 C6_1 C5_1 70.32(10) 2_656 . . . ? 
C4_1 V1 C6_1 C5_1 -28.49(7) . . . . ? 
C6_1 V1 C6_1 C1_1 -40.74(6) 2_656 . . . ? 
C2_1 V1 C6_1 C1_1 31.07(6) . . . . ? 
C2_1 V1 C6_1 C1_1 -102.75(7) 2_656 . . . ? 
C1_1 V1 C6_1 C1_1 -65.22(9) 2_656 . . . ? 
C5_1 V1 C6_1 C1_1 132.98(10) . . . . ? 
C3_1 V1 C6_1 C1_1 -136.86(7) 2_656 . . . ? 
C3_1 V1 C6_1 C1_1 68.28(7) . . . . ? 
C4_1 V1 C6_1 C1_1 -156.70(7) 2_656 . . . ? 
C4_1 V1 C6_1 C1_1 104.49(7) . . . . ? 
C6_1 C1_1 Sn1 C1_1 -70.24(8) . . . 2_656 ? 
C2_1 C1_1 Sn1 C1_1 71.12(8) . . . 2_656 ? 
V1 C1_1 Sn1 C1_1 0.0 . . . 2_656 ? 
C6_1 C1_1 Sn1 C1_2 41.50(10) . . . 2_656 ? 
C2_1 C1_1 Sn1 C1_2 -177.14(8) . . . 2_656 ? 
V1 C1_1 Sn1 C1_2 111.74(5) . . . 2_656 ? 
C6_1 C1_1 Sn1 C1_2 173.95(8) . . . . ? 
C2_1 C1_1 Sn1 C1_2 -44.68(9) . . . . ? 
V1 C1_1 Sn1 C1_2 -115.81(4) . . . . ? 
C1_1 Sn1 C1_2 C4_2 -26.12(10) 2_656 . . . ? 
C1_1 Sn1 C1_2 C4_2 69.28(9) . . . . ? 
C1_2 Sn1 C1_2 C4_2 -157.43(9) 2_656 . . . ? 
C1_1 Sn1 C1_2 C3_2 94.17(8) 2_656 . . . ? 
C1_1 Sn1 C1_2 C3_2 -170.43(8) . . . . ? 
C1_2 Sn1 C1_2 C3_2 -37.15(7) 2_656 . . . ? 
C1_1 Sn1 C1_2 C2_2 -146.77(7) 2_656 . . . ? 
C1_1 Sn1 C1_2 C2_2 -51.37(9) . . . . ? 
C1_2 Sn1 C1_2 C2_2 81.92(7) 2_656 . . . ? 
 
_diffrn_measured_fraction_theta_max    0.981 
_diffrn_reflns_theta_full              26.00 
_diffrn_measured_fraction_theta_full   1.000 
_refine_diff_density_max    0.381 
_refine_diff_density_min   -0.215 
_refine_diff_density_rms    0.052 


####################################################

data_6 

# 1. Submission Details

_publ_contact_author_name   'Prof. Dr. Holger Braunschweig'
_publ_contact_author_address
; Institut fuer Anorganische Chemie
Universitaet Wuerzburg
Am Hubland
97074 Wuerzburg, Germany
;
_publ_contact_author_email         'H.Braunschweig@mail.uni-wuerzburg.de'
_publ_contact_author_fax           +49-931-3184623
_publ_contact_author_phone         +49-931-3185260

_publ_requested_journal            ?
_publ_requested_category           ?
_publ_requested_coeditor_name      ?

_publ_contact_letter
; ?
;

_publ_section_title
;?
;

_publ_section_abstract
;?
;

loop_
_publ_author_name
_publ_author_address
      'Braunschweig, Holger'
;     Institut fuer Anorganische Chemie
      Universitaet Wuerzburg
      Am Hubland
      D-97074 Wuerzburg, Germany
;
      'Dueck, Klaus'
;     Institut fuer Anorganische Chemie
      Universitaet Wuerzburg
      Am Hubland
      D-97074 Wuerzburg, Germany
;
      'Kramer, Thomas'
;     Institut fuer Anorganische Chemie
      Universitaet Wuerzburg
      Am Hubland
      D-97074 Wuerzburg, Germany
;
 
_audit_creation_method            SHELXL-97 
_chemical_name_systematic 
; 
?
; 
_chemical_name_common             
;
?
; 
_chemical_melting_point           ? 
_chemical_formula_moiety          
'C20 H28 Sn V'
 
_chemical_formula_sum 
 'C20 H28 Sn V'
_chemical_formula_weight          438.05 
 
loop_ 
 _atom_type_symbol 
 _atom_type_description 
 _atom_type_scat_dispersion_real 
 _atom_type_scat_dispersion_imag 
 _atom_type_scat_source 
 'C'  'C'   0.0033   0.0016 
 'International Tables Vol C Tables 4.2.6.8 and 6.1.1.4' 
 'H'  'H'   0.0000   0.0000 
 'International Tables Vol C Tables 4.2.6.8 and 6.1.1.4' 
 'V'  'V'   0.3005   0.5294 
 'International Tables Vol C Tables 4.2.6.8 and 6.1.1.4' 
 'Sn'  'Sn'  -0.6537   1.4246 
 'International Tables Vol C Tables 4.2.6.8 and 6.1.1.4' 
 
_symmetry_cell_setting            'Monoclinic' 
_symmetry_space_group_name_H-M    'P2(1)/c'
_symmetry_space_group_name_Hall   '-P 2ybc' 
 
loop_ 
 _symmetry_equiv_pos_as_xyz 
 'x, y, z' 
 '-x, y+1/2, -z+1/2' 
 '-x, -y, -z' 
 'x, -y-1/2, z-1/2' 
 
_cell_length_a                    12.8987(16) 
_cell_length_b                    9.3160(12) 
_cell_length_c                    16.749(2) 
_cell_angle_alpha                 90.00 
_cell_angle_beta                  110.477(2) 
_cell_angle_gamma                 90.00 
_cell_volume                      1885.4(4) 
_cell_formula_units_Z             4 
_cell_measurement_temperature     173(2) 
_cell_measurement_reflns_used     3840 
_cell_measurement_theta_min       2.54 
_cell_measurement_theta_max       25.84 
 
_exptl_crystal_description        'block' 
_exptl_crystal_colour             'violet' 
_exptl_crystal_size_max           0.18 
_exptl_crystal_size_mid           0.14 
_exptl_crystal_size_min           0.05 
_exptl_crystal_density_meas       ? 
_exptl_crystal_density_diffrn     1.543 
_exptl_crystal_density_method     'not measured' 
_exptl_crystal_F_000              884 
_exptl_absorpt_coefficient_mu     1.816 
_exptl_absorpt_correction_type    'multi-scan' 
_exptl_absorpt_correction_T_min   0.6109
_exptl_absorpt_correction_T_max   0.7453
_exptl_absorpt_process_details    'Sadabs 2008/1 (Brucker 2008)' 
 
_exptl_special_details 
; 
 The crystal was immersed in a film of perfluoropolyether oil, mounted
on a a glass fiber and transferred to stream of cold nitrogen. 
; 
 
_diffrn_ambient_temperature       173(2) 
_diffrn_radiation_wavelength      0.71073 
_diffrn_radiation_type            MoK\a 
_diffrn_radiation_source          'sealed tube' 
_diffrn_radiation_monochromator   'graphite' 
_diffrn_measurement_device_type   'Bruker APEX-I CCD' 
_diffrn_measurement_method        '\f and \w scans' 
_diffrn_detector_area_resol_mean  ? 
_diffrn_reflns_number             10300 
_diffrn_reflns_av_R_equivalents   0.0366 
_diffrn_reflns_av_sigmaI/netI     0.0429 
_diffrn_reflns_limit_h_min        -15 
_diffrn_reflns_limit_h_max        15 
_diffrn_reflns_limit_k_min        -11 
_diffrn_reflns_limit_k_max        11 
_diffrn_reflns_limit_l_min        -20 
_diffrn_reflns_limit_l_max        20 
_diffrn_reflns_theta_min          1.69 
_diffrn_reflns_theta_max          26.08 
_reflns_number_total              3682 
_reflns_number_gt                 3168 
_reflns_threshold_expression      >2sigma(I) 
 
_computing_data_collection        'Smart NT ver. 5.63 (Bruker AXS)' 
_computing_cell_refinement        'Saint+ NT ver. 7.68A (Bruker AXS)' 
_computing_data_reduction         'Saint+ NT ver. 7.68A (Bruker AXS)' 
_computing_structure_solution     'SHELXS-97 (Sheldrick, 2008)' 
_computing_structure_refinement   'SHELXL-97 (Sheldrick, 2008)' 
_computing_molecular_graphics     'XP ver. 5.1 (Bruker AXS, 1998)' 
_computing_publication_material   'SHELXL-97 (Sheldrick, 2008)' 
 
_refine_special_details 
; 
 Refinement of F^2^ against ALL reflections.  The weighted R-factor wR and 
 goodness of fit S are based on F^2^, conventional R-factors R are based 
 on F, with F set to zero for negative F^2^. The threshold expression of 
 F^2^ > 2sigma(F^2^) is used only for calculating R-factors(gt) etc. and is 
 not relevant to the choice of reflections for refinement.  R-factors based 
 on F^2^ are statistically about twice as large as those based on F, and R- 
 factors based on ALL data will be even larger. 
; 
 
_refine_ls_structure_factor_coef  Fsqd  
_refine_ls_matrix_type            full 
_refine_ls_weighting_scheme       calc  
_refine_ls_weighting_details 
 'calc w=1/[\s^2^(Fo^2^)+(0.0431P)^2^+0.0000P] where P=(Fo^2^+2Fc^2^)/3' 
_atom_sites_solution_primary      direct 
_atom_sites_solution_secondary    difmap 
_atom_sites_solution_hydrogens    geom 
_refine_ls_hydrogen_treatment     constr 
_refine_ls_extinction_method      none 
_refine_ls_extinction_coef        ? 
_refine_ls_number_reflns          3682 
_refine_ls_number_parameters      205 
_refine_ls_number_restraints      0 
_refine_ls_R_factor_all           0.0365 
_refine_ls_R_factor_gt            0.0304 
_refine_ls_wR_factor_ref          0.0782 
_refine_ls_wR_factor_gt           0.0754 
_refine_ls_goodness_of_fit_ref    1.025 
_refine_ls_restrained_S_all       1.025 
_refine_ls_shift/su_max           0.000 
_refine_ls_shift/su_mean          0.000 
 
loop_ 
 _atom_site_label 
 _atom_site_type_symbol 
 _atom_site_fract_x 
 _atom_site_fract_y 
 _atom_site_fract_z 
 _atom_site_U_iso_or_equiv 
 _atom_site_adp_type 
 _atom_site_occupancy 
 _atom_site_symmetry_multiplicity 
 _atom_site_calc_flag 
 _atom_site_refinement_flags 
 _atom_site_disorder_assembly 
 _atom_site_disorder_group 
Sn1_1 Sn 0.250317(16) 0.125172(19) 0.121813(12) 0.02866(9) Uani 1 1 d . . . 
V1_1 V 0.28092(4) -0.08396(5) 0.27916(3) 0.03168(13) Uani 1 1 d . . . 
C1_2 C 0.1395(2) 0.0052(3) 0.16985(18) 0.0324(6) Uani 1 1 d . . . 
C2_2 C 0.1327(2) -0.1482(3) 0.1687(2) 0.0376(7) Uani 1 1 d . . . 
H2_2 H 0.1394 -0.2080 0.1248 0.045 Uiso 1 1 calc R . . 
C3_2 C 0.1147(2) -0.1972(4) 0.2419(2) 0.0457(8) Uani 1 1 d . . . 
H3_2 H 0.1071 -0.2946 0.2557 0.055 Uiso 1 1 calc R . . 
C4_2 C 0.1099(3) -0.0777(4) 0.2908(2) 0.0457(8) Uani 1 1 d . . . 
H4_2 H 0.0987 -0.0791 0.3440 0.055 Uiso 1 1 calc R . . 
C5_2 C 0.1247(2) 0.0458(3) 0.2468(2) 0.0391(7) Uani 1 1 d . . . 
H5_2 H 0.1247 0.1418 0.2659 0.047 Uiso 1 1 calc R . . 
C1_3 C 0.3867(2) 0.0380(3) 0.22919(18) 0.0310(6) Uani 1 1 d . . . 
C2_3 C 0.4001(2) -0.1104(3) 0.2156(2) 0.0359(7) Uani 1 1 d . . . 
H2_3 H 0.4014 -0.1342 0.1608 0.043 Uiso 1 1 calc R . . 
C3_3 C 0.4116(2) -0.2273(4) 0.2713(2) 0.0474(8) Uani 1 1 d . . . 
H3_3 H 0.4214 -0.3178 0.2487 0.057 Uiso 1 1 calc R . . 
C4_3 C 0.4109(3) -0.2314(4) 0.3543(2) 0.0530(9) Uani 1 1 d . . . 
H4_3 H 0.4141 -0.3243 0.3785 0.064 Uiso 1 1 calc R . . 
C5_3 C 0.4061(3) -0.1167(4) 0.4066(2) 0.0538(10) Uani 1 1 d . . . 
H5_3 H 0.4068 -0.1404 0.4620 0.065 Uiso 1 1 calc R . . 
C6_3 C 0.4002(3) 0.0309(4) 0.3860(2) 0.0462(8) Uani 1 1 d . . . 
H6_3 H 0.4021 0.0940 0.4310 0.055 Uiso 1 1 calc R . . 
C7_3 C 0.3919(2) 0.0987(3) 0.3085(2) 0.0361(7) Uani 1 1 d . . . 
H7_3 H 0.3895 0.2006 0.3095 0.043 Uiso 1 1 calc R . . 
C1_4 C 0.2194(3) 0.3566(3) 0.1241(2) 0.0386(7) Uani 1 1 d . . . 
C2_4 C 0.2854(4) 0.4392(4) 0.0794(3) 0.0642(11) Uani 1 1 d . . . 
H2A_4 H 0.2702 0.5421 0.0807 0.096 Uiso 1 1 calc R . . 
H2B_4 H 0.2637 0.4070 0.0201 0.096 Uiso 1 1 calc R . . 
H2C_4 H 0.3646 0.4217 0.1087 0.096 Uiso 1 1 calc R . . 
C3_4 C 0.0958(3) 0.3786(4) 0.0792(3) 0.0729(13) Uani 1 1 d . . . 
H3A_4 H 0.0550 0.3192 0.1064 0.109 Uiso 1 1 calc R . . 
H3B_4 H 0.0752 0.3511 0.0191 0.109 Uiso 1 1 calc R . . 
H3C_4 H 0.0775 0.4799 0.0829 0.109 Uiso 1 1 calc R . . 
C4_4 C 0.2518(4) 0.4141(4) 0.2141(3) 0.0684(12) Uani 1 1 d . . . 
H4A_4 H 0.3321 0.4055 0.2427 0.103 Uiso 1 1 calc R . . 
H4B_4 H 0.2140 0.3588 0.2456 0.103 Uiso 1 1 calc R . . 
H4C_4 H 0.2303 0.5153 0.2123 0.103 Uiso 1 1 calc R . . 
C1_5 C 0.2451(3) 0.0456(3) -0.00302(19) 0.0391(7) Uani 1 1 d . . . 
C2_5 C 0.3588(3) 0.0642(4) -0.0092(2) 0.0549(9) Uani 1 1 d . . . 
H2A_5 H 0.4124 0.0050 0.0343 0.082 Uiso 1 1 calc R . . 
H2B_5 H 0.3808 0.1652 -0.0001 0.082 Uiso 1 1 calc R . . 
H2C_5 H 0.3566 0.0342 -0.0659 0.082 Uiso 1 1 calc R . . 
C3_5 C 0.2095(4) -0.1113(4) -0.0166(3) 0.0614(11) Uani 1 1 d . . . 
H3A_5 H 0.2135 -0.1448 -0.0709 0.092 Uiso 1 1 calc R . . 
H3B_5 H 0.1333 -0.1203 -0.0177 0.092 Uiso 1 1 calc R . . 
H3C_5 H 0.2588 -0.1694 0.0300 0.092 Uiso 1 1 calc R . . 
C4_5 C 0.1618(4) 0.1344(4) -0.0734(2) 0.0663(12) Uani 1 1 d . . . 
H4A_5 H 0.1889 0.2331 -0.0712 0.099 Uiso 1 1 calc R . . 
H4B_5 H 0.0903 0.1346 -0.0651 0.099 Uiso 1 1 calc R . . 
H4C_5 H 0.1529 0.0923 -0.1291 0.099 Uiso 1 1 calc R . . 
 
loop_ 
 _atom_site_aniso_label 
 _atom_site_aniso_U_11 
 _atom_site_aniso_U_22 
 _atom_site_aniso_U_33 
 _atom_site_aniso_U_23 
 _atom_site_aniso_U_13 
 _atom_site_aniso_U_12 
Sn1_1 0.02923(13) 0.02962(13) 0.02789(13) 0.00129(7) 0.01094(9) 0.00145(7) 
V1_1 0.0248(3) 0.0341(3) 0.0348(3) 0.0064(2) 0.0087(2) 0.0001(2) 
C1_2 0.0220(14) 0.0355(15) 0.0379(16) 0.0072(13) 0.0082(12) 0.0028(12) 
C2_2 0.0240(15) 0.0393(16) 0.0447(18) 0.0012(13) 0.0061(13) -0.0039(12) 
C3_2 0.0284(16) 0.0453(19) 0.060(2) 0.0164(16) 0.0111(15) -0.0035(14) 
C4_2 0.0314(17) 0.060(2) 0.053(2) 0.0152(17) 0.0233(15) 0.0032(15) 
C5_2 0.0286(15) 0.0454(18) 0.0453(18) 0.0042(14) 0.0157(14) 0.0039(13) 
C1_3 0.0211(14) 0.0357(15) 0.0370(16) 0.0022(12) 0.0111(12) -0.0014(11) 
C2_3 0.0233(15) 0.0389(16) 0.0440(18) 0.0015(13) 0.0099(13) 0.0029(12) 
C3_3 0.0304(17) 0.0366(16) 0.073(2) 0.0069(16) 0.0152(16) 0.0088(14) 
C4_3 0.0335(18) 0.049(2) 0.068(3) 0.0250(18) 0.0065(17) 0.0061(15) 
C5_3 0.039(2) 0.072(3) 0.039(2) 0.0212(17) 0.0000(16) -0.0060(16) 
C6_3 0.0391(18) 0.063(2) 0.0310(17) -0.0026(15) 0.0055(14) -0.0077(16) 
C7_3 0.0320(16) 0.0343(15) 0.0387(18) -0.0010(13) 0.0081(13) -0.0077(12) 
C1_4 0.0416(18) 0.0319(16) 0.048(2) 0.0079(12) 0.0223(15) 0.0084(13) 
C2_4 0.080(3) 0.044(2) 0.084(3) 0.017(2) 0.048(2) 0.0017(19) 
C3_4 0.054(3) 0.061(3) 0.102(4) 0.009(2) 0.025(2) 0.0237(19) 
C4_4 0.116(4) 0.0343(18) 0.064(3) -0.0045(18) 0.042(3) 0.001(2) 
C1_5 0.0363(17) 0.0508(19) 0.0289(15) -0.0085(13) 0.0100(13) -0.0035(14) 
C2_5 0.051(2) 0.068(2) 0.054(2) -0.0144(19) 0.0285(18) -0.0043(18) 
C3_5 0.073(3) 0.064(2) 0.047(2) -0.0206(18) 0.021(2) -0.024(2) 
C4_5 0.059(3) 0.096(3) 0.034(2) -0.0003(18) 0.0029(18) 0.008(2) 
 
_geom_special_details 
; 
 All esds (except the esd in the dihedral angle between two l.s. planes) 
 are estimated using the full covariance matrix.  The cell esds are taken 
 into account individually in the estimation of esds in distances, angles 
 and torsion angles; correlations between esds in cell parameters are only 
 used when they are defined by crystal symmetry.  An approximate (isotropic) 
 treatment of cell esds is used for estimating esds involving l.s. planes. 
; 
 
loop_ 
 _geom_bond_atom_site_label_1 
 _geom_bond_atom_site_label_2 
 _geom_bond_distance 
 _geom_bond_site_symmetry_2 
 _geom_bond_publ_flag 
Sn1_1 C1_2 2.179(3) . ? 
Sn1_1 C1_3 2.185(3) . ? 
Sn1_1 C1_4 2.195(3) . ? 
Sn1_1 C1_5 2.197(3) . ? 
Sn1_1 V1_1 3.1889(6) . ? 
V1_1 C1_3 2.157(3) . ? 
V1_1 C7_3 2.167(3) . ? 
V1_1 C2_3 2.169(3) . ? 
V1_1 C6_3 2.188(3) . ? 
V1_1 C3_3 2.190(3) . ? 
V1_1 C4_3 2.192(3) . ? 
V1_1 C5_3 2.201(3) . ? 
V1_1 C2_2 2.228(3) . ? 
V1_1 C1_2 2.244(3) . ? 
V1_1 C5_2 2.248(3) . ? 
V1_1 C3_2 2.272(3) . ? 
V1_1 C4_2 2.283(3) . ? 
C1_2 C5_2 1.418(4) . ? 
C1_2 C2_2 1.432(4) . ? 
C2_2 C3_2 1.400(5) . ? 
C2_2 H2_2 0.9500 . ? 
C3_2 C4_2 1.397(5) . ? 
C3_2 H3_2 0.9500 . ? 
C4_2 C5_2 1.416(4) . ? 
C4_2 H4_2 0.9500 . ? 
C5_2 H5_2 0.9500 . ? 
C1_3 C2_3 1.422(4) . ? 
C1_3 C7_3 1.423(4) . ? 
C2_3 C3_3 1.408(4) . ? 
C2_3 H2_3 0.9500 . ? 
C3_3 C4_3 1.395(5) . ? 
C3_3 H3_3 0.9500 . ? 
C4_3 C5_3 1.397(5) . ? 
C4_3 H4_3 0.9500 . ? 
C5_3 C6_3 1.413(5) . ? 
C5_3 H5_3 0.9500 . ? 
C6_3 C7_3 1.414(5) . ? 
C6_3 H6_3 0.9500 . ? 
C7_3 H7_3 0.9500 . ? 
C1_4 C4_4 1.515(5) . ? 
C1_4 C2_4 1.525(5) . ? 
C1_4 C3_4 1.520(5) . ? 
C2_4 H2A_4 0.9800 . ? 
C2_4 H2B_4 0.9800 . ? 
C2_4 H2C_4 0.9800 . ? 
C3_4 H3A_4 0.9800 . ? 
C3_4 H3B_4 0.9800 . ? 
C3_4 H3C_4 0.9800 . ? 
C4_4 H4A_4 0.9800 . ? 
C4_4 H4B_4 0.9800 . ? 
C4_4 H4C_4 0.9800 . ? 
C1_5 C2_5 1.515(5) . ? 
C1_5 C3_5 1.525(4) . ? 
C1_5 C4_5 1.531(5) . ? 
C2_5 H2A_5 0.9800 . ? 
C2_5 H2B_5 0.9800 . ? 
C2_5 H2C_5 0.9800 . ? 
C3_5 H3A_5 0.9800 . ? 
C3_5 H3B_5 0.9800 . ? 
C3_5 H3C_5 0.9800 . ? 
C4_5 H4A_5 0.9800 . ? 
C4_5 H4B_5 0.9800 . ? 
C4_5 H4C_5 0.9800 . ? 
 
loop_ 
 _geom_angle_atom_site_label_1 
 _geom_angle_atom_site_label_2 
 _geom_angle_atom_site_label_3 
 _geom_angle 
 _geom_angle_site_symmetry_1 
 _geom_angle_site_symmetry_3 
 _geom_angle_publ_flag 
C1_2 Sn1_1 C1_3 87.09(10) . . ? 
C1_2 Sn1_1 C1_4 110.51(12) . . ? 
C1_3 Sn1_1 C1_4 116.71(12) . . ? 
C1_2 Sn1_1 C1_5 111.91(11) . . ? 
C1_3 Sn1_1 C1_5 113.92(11) . . ? 
C1_4 Sn1_1 C1_5 113.74(12) . . ? 
C1_2 Sn1_1 V1_1 44.67(7) . . ? 
C1_3 Sn1_1 V1_1 42.41(7) . . ? 
C1_4 Sn1_1 V1_1 123.80(9) . . ? 
C1_5 Sn1_1 V1_1 122.29(9) . . ? 
C1_3 V1_1 C7_3 38.43(12) . . ? 
C1_3 V1_1 C2_3 38.37(10) . . ? 
C7_3 V1_1 C2_3 71.02(12) . . ? 
C1_3 V1_1 C6_3 72.57(12) . . ? 
C7_3 V1_1 C6_3 37.89(12) . . ? 
C2_3 V1_1 C6_3 92.34(12) . . ? 
C1_3 V1_1 C3_3 72.13(12) . . ? 
C7_3 V1_1 C3_3 91.78(12) . . ? 
C2_3 V1_1 C3_3 37.68(11) . . ? 
C6_3 V1_1 C3_3 90.67(13) . . ? 
C1_3 V1_1 C4_3 95.29(12) . . ? 
C7_3 V1_1 C4_3 92.86(12) . . ? 
C2_3 V1_1 C4_3 71.32(13) . . ? 
C6_3 V1_1 C4_3 70.06(14) . . ? 
C3_3 V1_1 C4_3 37.11(13) . . ? 
C1_3 V1_1 C5_3 95.76(12) . . ? 
C7_3 V1_1 C5_3 71.74(12) . . ? 
C2_3 V1_1 C5_3 93.17(14) . . ? 
C6_3 V1_1 C5_3 37.55(12) . . ? 
C3_3 V1_1 C5_3 69.84(15) . . ? 
C4_3 V1_1 C5_3 37.08(14) . . ? 
C1_3 V1_1 C2_2 107.17(11) . . ? 
C7_3 V1_1 C2_2 134.95(11) . . ? 
C2_3 V1_1 C2_2 96.40(12) . . ? 
C6_3 V1_1 C2_2 164.66(12) . . ? 
C3_3 V1_1 C2_2 103.95(13) . . ? 
C4_3 V1_1 C2_2 124.77(13) . . ? 
C5_3 V1_1 C2_2 153.31(12) . . ? 
C1_3 V1_1 C1_2 86.14(10) . . ? 
C7_3 V1_1 C1_2 100.28(11) . . ? 
C2_3 V1_1 C1_2 98.93(11) . . ? 
C6_3 V1_1 C1_2 128.66(12) . . ? 
C3_3 V1_1 C1_2 126.86(13) . . ? 
C4_3 V1_1 C1_2 160.20(14) . . ? 
C5_3 V1_1 C1_2 162.51(13) . . ? 
C2_2 V1_1 C1_2 37.36(10) . . ? 
C1_3 V1_1 C5_2 104.99(11) . . ? 
C7_3 V1_1 C5_2 95.63(12) . . ? 
C2_3 V1_1 C5_2 132.24(11) . . ? 
C6_3 V1_1 C5_2 104.43(13) . . ? 
C3_3 V1_1 C5_2 163.18(13) . . ? 
C4_3 V1_1 C5_2 156.44(13) . . ? 
C5_3 V1_1 C5_2 126.88(14) . . ? 
C2_2 V1_1 C5_2 60.49(12) . . ? 
C1_2 V1_1 C5_2 36.80(11) . . ? 
C1_3 V1_1 C3_2 143.33(12) . . ? 
C7_3 V1_1 C3_2 155.80(12) . . ? 
C2_3 V1_1 C3_2 125.09(13) . . ? 
C6_3 V1_1 C3_2 141.06(13) . . ? 
C3_3 V1_1 C3_2 111.86(13) . . ? 
C4_3 V1_1 C3_2 109.00(12) . . ? 
C5_3 V1_1 C3_2 120.25(13) . . ? 
C2_2 V1_1 C3_2 36.25(12) . . ? 
C1_2 V1_1 C3_2 61.82(11) . . ? 
C5_2 V1_1 C3_2 60.20(11) . . ? 
C1_3 V1_1 C4_2 141.39(11) . . ? 
C7_3 V1_1 C4_2 122.86(13) . . ? 
C2_3 V1_1 C4_2 156.53(12) . . ? 
C6_3 V1_1 C4_2 109.98(13) . . ? 
C3_3 V1_1 C4_2 143.88(12) . . ? 
C4_3 V1_1 C4_2 122.32(13) . . ? 
C5_3 V1_1 C4_2 108.86(15) . . ? 
C2_2 V1_1 C4_2 60.23(13) . . ? 
C1_2 V1_1 C4_2 61.71(11) . . ? 
C5_2 V1_1 C4_2 36.40(11) . . ? 
C3_2 V1_1 C4_2 35.72(13) . . ? 
C5_2 C1_2 C2_2 104.5(3) . . ? 
C5_2 C1_2 Sn1_1 120.9(2) . . ? 
C2_2 C1_2 Sn1_1 123.5(2) . . ? 
C5_2 C1_2 V1_1 71.75(16) . . ? 
C2_2 C1_2 V1_1 70.70(15) . . ? 
Sn1_1 C1_2 V1_1 92.28(10) . . ? 
C3_2 C2_2 C1_2 110.0(3) . . ? 
C3_2 C2_2 V1_1 73.61(18) . . ? 
C1_2 C2_2 V1_1 71.94(16) . . ? 
C3_2 C2_2 H2_2 125.0 . . ? 
C1_2 C2_2 H2_2 125.0 . . ? 
V1_1 C2_2 H2_2 121.1 . . ? 
C4_2 C3_2 C2_2 108.0(3) . . ? 
C4_2 C3_2 V1_1 72.57(18) . . ? 
C2_2 C3_2 V1_1 70.14(17) . . ? 
C4_2 C3_2 H3_2 126.0 . . ? 
C2_2 C3_2 H3_2 126.0 . . ? 
V1_1 C3_2 H3_2 123.0 . . ? 
C3_2 C4_2 C5_2 107.4(3) . . ? 
C3_2 C4_2 V1_1 71.71(18) . . ? 
C5_2 C4_2 V1_1 70.44(17) . . ? 
C3_2 C4_2 H4_2 126.3 . . ? 
C5_2 C4_2 H4_2 126.3 . . ? 
V1_1 C4_2 H4_2 123.2 . . ? 
C4_2 C5_2 C1_2 110.1(3) . . ? 
C4_2 C5_2 V1_1 73.15(17) . . ? 
C1_2 C5_2 V1_1 71.45(16) . . ? 
C4_2 C5_2 H5_2 125.0 . . ? 
C1_2 C5_2 H5_2 125.0 . . ? 
V1_1 C5_2 H5_2 122.0 . . ? 
C2_3 C1_3 C7_3 124.6(3) . . ? 
C2_3 C1_3 V1_1 71.24(17) . . ? 
C7_3 C1_3 V1_1 71.15(17) . . ? 
C2_3 C1_3 Sn1_1 109.7(2) . . ? 
C7_3 C1_3 Sn1_1 112.4(2) . . ? 
V1_1 C1_3 Sn1_1 94.49(10) . . ? 
C3_3 C2_3 C1_3 129.5(3) . . ? 
C3_3 C2_3 V1_1 72.0(2) . . ? 
C1_3 C2_3 V1_1 70.38(17) . . ? 
C3_3 C2_3 H2_3 115.2 . . ? 
C1_3 C2_3 H2_3 115.2 . . ? 
V1_1 C2_3 H2_3 139.2 . . ? 
C4_3 C3_3 C2_3 130.2(3) . . ? 
C4_3 C3_3 V1_1 71.52(19) . . ? 
C2_3 C3_3 V1_1 70.33(17) . . ? 
C4_3 C3_3 H3_3 114.9 . . ? 
C2_3 C3_3 H3_3 114.9 . . ? 
V1_1 C3_3 H3_3 141.0 . . ? 
C3_3 C4_3 C5_3 128.4(3) . . ? 
C3_3 C4_3 V1_1 71.37(18) . . ? 
C5_3 C4_3 V1_1 71.81(19) . . ? 
C3_3 C4_3 H4_3 115.8 . . ? 
C5_3 C4_3 H4_3 115.8 . . ? 
V1_1 C4_3 H4_3 136.6 . . ? 
C4_3 C5_3 C6_3 127.0(3) . . ? 
C4_3 C5_3 V1_1 71.1(2) . . ? 
C6_3 C5_3 V1_1 70.71(18) . . ? 
C4_3 C5_3 H5_3 116.5 . . ? 
C6_3 C5_3 H5_3 116.5 . . ? 
V1_1 C5_3 H5_3 137.1 . . ? 
C5_3 C6_3 C7_3 129.8(3) . . ? 
C5_3 C6_3 V1_1 71.73(19) . . ? 
C7_3 C6_3 V1_1 70.25(17) . . ? 
C5_3 C6_3 H6_3 115.1 . . ? 
C7_3 C6_3 H6_3 115.1 . . ? 
V1_1 C6_3 H6_3 140.1 . . ? 
C6_3 C7_3 C1_3 130.0(3) . . ? 
C6_3 C7_3 V1_1 71.86(18) . . ? 
C1_3 C7_3 V1_1 70.43(16) . . ? 
C6_3 C7_3 H7_3 115.0 . . ? 
C1_3 C7_3 H7_3 115.0 . . ? 
V1_1 C7_3 H7_3 139.9 . . ? 
C4_4 C1_4 C2_4 107.6(3) . . ? 
C4_4 C1_4 C3_4 108.7(4) . . ? 
C2_4 C1_4 C3_4 110.9(3) . . ? 
C4_4 C1_4 Sn1_1 112.1(2) . . ? 
C2_4 C1_4 Sn1_1 110.6(2) . . ? 
C3_4 C1_4 Sn1_1 106.9(2) . . ? 
C1_4 C2_4 H2A_4 109.5 . . ? 
C1_4 C2_4 H2B_4 109.5 . . ? 
H2A_4 C2_4 H2B_4 109.5 . . ? 
C1_4 C2_4 H2C_4 109.5 . . ? 
H2A_4 C2_4 H2C_4 109.5 . . ? 
H2B_4 C2_4 H2C_4 109.5 . . ? 
C1_4 C3_4 H3A_4 109.5 . . ? 
C1_4 C3_4 H3B_4 109.5 . . ? 
H3A_4 C3_4 H3B_4 109.5 . . ? 
C1_4 C3_4 H3C_4 109.5 . . ? 
H3A_4 C3_4 H3C_4 109.5 . . ? 
H3B_4 C3_4 H3C_4 109.5 . . ? 
C1_4 C4_4 H4A_4 109.5 . . ? 
C1_4 C4_4 H4B_4 109.5 . . ? 
H4A_4 C4_4 H4B_4 109.5 . . ? 
C1_4 C4_4 H4C_4 109.5 . . ? 
H4A_4 C4_4 H4C_4 109.5 . . ? 
H4B_4 C4_4 H4C_4 109.5 . . ? 
C2_5 C1_5 C3_5 110.3(3) . . ? 
C2_5 C1_5 C4_5 108.7(3) . . ? 
C3_5 C1_5 C4_5 108.0(3) . . ? 
C2_5 C1_5 Sn1_1 108.6(2) . . ? 
C3_5 C1_5 Sn1_1 111.9(2) . . ? 
C4_5 C1_5 Sn1_1 109.3(2) . . ? 
C1_5 C2_5 H2A_5 109.5 . . ? 
C1_5 C2_5 H2B_5 109.5 . . ? 
H2A_5 C2_5 H2B_5 109.5 . . ? 
C1_5 C2_5 H2C_5 109.5 . . ? 
H2A_5 C2_5 H2C_5 109.5 . . ? 
H2B_5 C2_5 H2C_5 109.5 . . ? 
C1_5 C3_5 H3A_5 109.5 . . ? 
C1_5 C3_5 H3B_5 109.5 . . ? 
H3A_5 C3_5 H3B_5 109.5 . . ? 
C1_5 C3_5 H3C_5 109.5 . . ? 
H3A_5 C3_5 H3C_5 109.5 . . ? 
H3B_5 C3_5 H3C_5 109.5 . . ? 
C1_5 C4_5 H4A_5 109.5 . . ? 
C1_5 C4_5 H4B_5 109.5 . . ? 
H4A_5 C4_5 H4B_5 109.5 . . ? 
C1_5 C4_5 H4C_5 109.5 . . ? 
H4A_5 C4_5 H4C_5 109.5 . . ? 
H4B_5 C4_5 H4C_5 109.5 . . ? 
 
loop_ 
 _geom_torsion_atom_site_label_1 
 _geom_torsion_atom_site_label_2 
 _geom_torsion_atom_site_label_3 
 _geom_torsion_atom_site_label_4 
 _geom_torsion 
 _geom_torsion_site_symmetry_1 
 _geom_torsion_site_symmetry_2 
 _geom_torsion_site_symmetry_3 
 _geom_torsion_site_symmetry_4 
 _geom_torsion_publ_flag 
C1_3 Sn1_1 C1_2 C5_2 69.7(2) . . . . ? 
C1_4 Sn1_1 C1_2 C5_2 -47.8(3) . . . . ? 
C1_5 Sn1_1 C1_2 C5_2 -175.6(2) . . . . ? 
V1_1 Sn1_1 C1_2 C5_2 70.0(2) . . . . ? 
C1_3 Sn1_1 C1_2 C2_2 -68.6(2) . . . . ? 
C1_4 Sn1_1 C1_2 C2_2 173.9(2) . . . . ? 
C1_5 Sn1_1 C1_2 C2_2 46.1(3) . . . . ? 
V1_1 Sn1_1 C1_2 C2_2 -68.3(2) . . . . ? 
C1_3 Sn1_1 C1_2 V1_1 -0.32(11) . . . . ? 
C1_4 Sn1_1 C1_2 V1_1 -117.80(12) . . . . ? 
C1_5 Sn1_1 C1_2 V1_1 114.33(11) . . . . ? 
C1_3 V1_1 C1_2 C5_2 -121.53(19) . . . . ? 
C7_3 V1_1 C1_2 C5_2 -85.6(2) . . . . ? 
C2_3 V1_1 C1_2 C5_2 -157.82(18) . . . . ? 
C6_3 V1_1 C1_2 C5_2 -57.5(2) . . . . ? 
C3_3 V1_1 C1_2 C5_2 174.25(18) . . . . ? 
C4_3 V1_1 C1_2 C5_2 143.6(3) . . . . ? 
C5_3 V1_1 C1_2 C5_2 -24.6(5) . . . . ? 
C2_2 V1_1 C1_2 C5_2 113.3(3) . . . . ? 
C3_2 V1_1 C1_2 C5_2 77.0(2) . . . . ? 
C4_2 V1_1 C1_2 C5_2 36.26(18) . . . . ? 
C1_3 V1_1 C1_2 C2_2 125.16(19) . . . . ? 
C7_3 V1_1 C1_2 C2_2 161.04(19) . . . . ? 
C2_3 V1_1 C1_2 C2_2 88.87(19) . . . . ? 
C6_3 V1_1 C1_2 C2_2 -170.8(2) . . . . ? 
C3_3 V1_1 C1_2 C2_2 60.9(2) . . . . ? 
C4_3 V1_1 C1_2 C2_2 30.2(4) . . . . ? 
C5_3 V1_1 C1_2 C2_2 -137.9(4) . . . . ? 
C5_2 V1_1 C1_2 C2_2 -113.3(3) . . . . ? 
C3_2 V1_1 C1_2 C2_2 -36.30(19) . . . . ? 
C4_2 V1_1 C1_2 C2_2 -77.0(2) . . . . ? 
C1_3 V1_1 C1_2 Sn1_1 0.32(11) . . . . ? 
C7_3 V1_1 C1_2 Sn1_1 36.20(13) . . . . ? 
C2_3 V1_1 C1_2 Sn1_1 -35.97(12) . . . . ? 
C6_3 V1_1 C1_2 Sn1_1 64.31(17) . . . . ? 
C3_3 V1_1 C1_2 Sn1_1 -63.90(16) . . . . ? 
C4_3 V1_1 C1_2 Sn1_1 -94.6(3) . . . . ? 
C5_3 V1_1 C1_2 Sn1_1 97.2(4) . . . . ? 
C2_2 V1_1 C1_2 Sn1_1 -124.8(2) . . . . ? 
C5_2 V1_1 C1_2 Sn1_1 121.9(2) . . . . ? 
C3_2 V1_1 C1_2 Sn1_1 -161.14(16) . . . . ? 
C4_2 V1_1 C1_2 Sn1_1 158.11(16) . . . . ? 
C5_2 C1_2 C2_2 C3_2 0.0(3) . . . . ? 
Sn1_1 C1_2 C2_2 C3_2 143.8(2) . . . . ? 
V1_1 C1_2 C2_2 C3_2 64.3(2) . . . . ? 
C5_2 C1_2 C2_2 V1_1 -64.30(19) . . . . ? 
Sn1_1 C1_2 C2_2 V1_1 79.56(18) . . . . ? 
C1_3 V1_1 C2_2 C3_2 -176.67(19) . . . . ? 
C7_3 V1_1 C2_2 C3_2 -144.9(2) . . . . ? 
C2_3 V1_1 C2_2 C3_2 145.6(2) . . . . ? 
C6_3 V1_1 C2_2 C3_2 -90.1(5) . . . . ? 
C3_3 V1_1 C2_2 C3_2 108.1(2) . . . . ? 
C4_3 V1_1 C2_2 C3_2 73.9(2) . . . . ? 
C5_3 V1_1 C2_2 C3_2 35.3(4) . . . . ? 
C1_2 V1_1 C2_2 C3_2 -118.0(3) . . . . ? 
C5_2 V1_1 C2_2 C3_2 -78.8(2) . . . . ? 
C4_2 V1_1 C2_2 C3_2 -36.71(19) . . . . ? 
C1_3 V1_1 C2_2 C1_2 -58.6(2) . . . . ? 
C7_3 V1_1 C2_2 C1_2 -26.9(3) . . . . ? 
C2_3 V1_1 C2_2 C1_2 -96.34(19) . . . . ? 
C6_3 V1_1 C2_2 C1_2 28.0(6) . . . . ? 
C3_3 V1_1 C2_2 C1_2 -133.89(19) . . . . ? 
C4_3 V1_1 C2_2 C1_2 -168.01(18) . . . . ? 
C5_3 V1_1 C2_2 C1_2 153.4(3) . . . . ? 
C5_2 V1_1 C2_2 C1_2 39.21(17) . . . . ? 
C3_2 V1_1 C2_2 C1_2 118.0(3) . . . . ? 
C4_2 V1_1 C2_2 C1_2 81.34(19) . . . . ? 
C1_2 C2_2 C3_2 C4_2 -0.1(3) . . . . ? 
V1_1 C2_2 C3_2 C4_2 63.1(2) . . . . ? 
C1_2 C2_2 C3_2 V1_1 -63.2(2) . . . . ? 
C1_3 V1_1 C3_2 C4_2 -111.9(3) . . . . ? 
C7_3 V1_1 C3_2 C4_2 -34.2(4) . . . . ? 
C2_3 V1_1 C3_2 C4_2 -160.58(19) . . . . ? 
C6_3 V1_1 C3_2 C4_2 37.8(3) . . . . ? 
C3_3 V1_1 C3_2 C4_2 158.9(2) . . . . ? 
C4_3 V1_1 C3_2 C4_2 119.3(2) . . . . ? 
C5_3 V1_1 C3_2 C4_2 80.2(2) . . . . ? 
C2_2 V1_1 C3_2 C4_2 -117.3(3) . . . . ? 
C1_2 V1_1 C3_2 C4_2 -79.9(2) . . . . ? 
C5_2 V1_1 C3_2 C4_2 -37.60(19) . . . . ? 
C1_3 V1_1 C3_2 C2_2 5.3(3) . . . . ? 
C7_3 V1_1 C3_2 C2_2 83.1(4) . . . . ? 
C2_3 V1_1 C3_2 C2_2 -43.3(2) . . . . ? 
C6_3 V1_1 C3_2 C2_2 155.1(2) . . . . ? 
C3_3 V1_1 C3_2 C2_2 -83.8(2) . . . . ? 
C4_3 V1_1 C3_2 C2_2 -123.4(2) . . . . ? 
C5_3 V1_1 C3_2 C2_2 -162.5(2) . . . . ? 
C1_2 V1_1 C3_2 C2_2 37.41(18) . . . . ? 
C5_2 V1_1 C3_2 C2_2 79.7(2) . . . . ? 
C4_2 V1_1 C3_2 C2_2 117.3(3) . . . . ? 
C2_2 C3_2 C4_2 C5_2 0.2(3) . . . . ? 
V1_1 C3_2 C4_2 C5_2 61.8(2) . . . . ? 
C2_2 C3_2 C4_2 V1_1 -61.5(2) . . . . ? 
C1_3 V1_1 C4_2 C3_2 117.4(2) . . . . ? 
C7_3 V1_1 C4_2 C3_2 164.10(19) . . . . ? 
C2_3 V1_1 C4_2 C3_2 43.1(4) . . . . ? 
C6_3 V1_1 C4_2 C3_2 -155.79(19) . . . . ? 
C3_3 V1_1 C4_2 C3_2 -34.5(3) . . . . ? 
C4_3 V1_1 C4_2 C3_2 -77.3(2) . . . . ? 
C5_3 V1_1 C4_2 C3_2 -115.9(2) . . . . ? 
C2_2 V1_1 C4_2 C3_2 37.26(18) . . . . ? 
C1_2 V1_1 C4_2 C3_2 80.2(2) . . . . ? 
C5_2 V1_1 C4_2 C3_2 116.9(3) . . . . ? 
C1_3 V1_1 C4_2 C5_2 0.5(3) . . . . ? 
C7_3 V1_1 C4_2 C5_2 47.2(2) . . . . ? 
C2_3 V1_1 C4_2 C5_2 -73.8(4) . . . . ? 
C6_3 V1_1 C4_2 C5_2 87.3(2) . . . . ? 
C3_3 V1_1 C4_2 C5_2 -151.4(2) . . . . ? 
C4_3 V1_1 C4_2 C5_2 165.8(2) . . . . ? 
C5_3 V1_1 C4_2 C5_2 127.2(2) . . . . ? 
C2_2 V1_1 C4_2 C5_2 -79.6(2) . . . . ? 
C1_2 V1_1 C4_2 C5_2 -36.65(19) . . . . ? 
C3_2 V1_1 C4_2 C5_2 -116.9(3) . . . . ? 
C3_2 C4_2 C5_2 C1_2 -0.3(3) . . . . ? 
V1_1 C4_2 C5_2 C1_2 62.3(2) . . . . ? 
C3_2 C4_2 C5_2 V1_1 -62.6(2) . . . . ? 
C2_2 C1_2 C5_2 C4_2 0.2(3) . . . . ? 
Sn1_1 C1_2 C5_2 C4_2 -144.9(2) . . . . ? 
V1_1 C1_2 C5_2 C4_2 -63.4(2) . . . . ? 
C2_2 C1_2 C5_2 V1_1 63.57(18) . . . . ? 
Sn1_1 C1_2 C5_2 V1_1 -81.47(17) . . . . ? 
C1_3 V1_1 C5_2 C4_2 -179.7(2) . . . . ? 
C7_3 V1_1 C5_2 C4_2 -141.7(2) . . . . ? 
C2_3 V1_1 C5_2 C4_2 148.9(2) . . . . ? 
C6_3 V1_1 C5_2 C4_2 -104.2(2) . . . . ? 
C3_3 V1_1 C5_2 C4_2 102.6(4) . . . . ? 
C4_3 V1_1 C5_2 C4_2 -31.1(4) . . . . ? 
C5_3 V1_1 C5_2 C4_2 -70.3(2) . . . . ? 
C2_2 V1_1 C5_2 C4_2 78.8(2) . . . . ? 
C1_2 V1_1 C5_2 C4_2 118.7(3) . . . . ? 
C3_2 V1_1 C5_2 C4_2 36.9(2) . . . . ? 
C1_3 V1_1 C5_2 C1_2 61.69(19) . . . . ? 
C7_3 V1_1 C5_2 C1_2 99.64(19) . . . . ? 
C2_3 V1_1 C5_2 C1_2 30.2(2) . . . . ? 
C6_3 V1_1 C5_2 C1_2 137.13(18) . . . . ? 
C3_3 V1_1 C5_2 C1_2 -16.1(5) . . . . ? 
C4_3 V1_1 C5_2 C1_2 -149.8(3) . . . . ? 
C5_3 V1_1 C5_2 C1_2 171.00(17) . . . . ? 
C2_2 V1_1 C5_2 C1_2 -39.82(17) . . . . ? 
C3_2 V1_1 C5_2 C1_2 -81.8(2) . . . . ? 
C4_2 V1_1 C5_2 C1_2 -118.7(3) . . . . ? 
C7_3 V1_1 C1_3 C2_3 138.5(2) . . . . ? 
C6_3 V1_1 C1_3 C2_3 117.74(19) . . . . ? 
C3_3 V1_1 C1_3 C2_3 21.19(18) . . . . ? 
C4_3 V1_1 C1_3 C2_3 50.6(2) . . . . ? 
C5_3 V1_1 C1_3 C2_3 87.83(19) . . . . ? 
C2_2 V1_1 C1_3 C2_3 -78.33(19) . . . . ? 
C1_2 V1_1 C1_3 C2_3 -109.61(18) . . . . ? 
C5_2 V1_1 C1_3 C2_3 -141.52(18) . . . . ? 
C3_2 V1_1 C1_3 C2_3 -81.6(2) . . . . ? 
C4_2 V1_1 C1_3 C2_3 -141.8(2) . . . . ? 
C2_3 V1_1 C1_3 C7_3 -138.5(2) . . . . ? 
C6_3 V1_1 C1_3 C7_3 -20.76(18) . . . . ? 
C3_3 V1_1 C1_3 C7_3 -117.31(19) . . . . ? 
C4_3 V1_1 C1_3 C7_3 -87.93(19) . . . . ? 
C5_3 V1_1 C1_3 C7_3 -50.67(19) . . . . ? 
C2_2 V1_1 C1_3 C7_3 143.16(17) . . . . ? 
C1_2 V1_1 C1_3 C7_3 111.88(18) . . . . ? 
C5_2 V1_1 C1_3 C7_3 79.98(18) . . . . ? 
C3_2 V1_1 C1_3 C7_3 139.9(2) . . . . ? 
C4_2 V1_1 C1_3 C7_3 79.6(2) . . . . ? 
C7_3 V1_1 C1_3 Sn1_1 -112.20(19) . . . . ? 
C2_3 V1_1 C1_3 Sn1_1 109.29(19) . . . . ? 
C6_3 V1_1 C1_3 Sn1_1 -132.97(14) . . . . ? 
C3_3 V1_1 C1_3 Sn1_1 130.48(14) . . . . ? 
C4_3 V1_1 C1_3 Sn1_1 159.87(14) . . . . ? 
C5_3 V1_1 C1_3 Sn1_1 -162.88(13) . . . . ? 
C2_2 V1_1 C1_3 Sn1_1 30.96(13) . . . . ? 
C1_2 V1_1 C1_3 Sn1_1 -0.32(11) . . . . ? 
C5_2 V1_1 C1_3 Sn1_1 -32.23(13) . . . . ? 
C3_2 V1_1 C1_3 Sn1_1 27.7(2) . . . . ? 
C4_2 V1_1 C1_3 Sn1_1 -32.6(2) . . . . ? 
C1_2 Sn1_1 C1_3 C2_3 72.0(2) . . . . ? 
C1_4 Sn1_1 C1_3 C2_3 -176.5(2) . . . . ? 
C1_5 Sn1_1 C1_3 C2_3 -40.7(2) . . . . ? 
V1_1 Sn1_1 C1_3 C2_3 71.7(2) . . . . ? 
C1_2 Sn1_1 C1_3 C7_3 -71.1(2) . . . . ? 
C1_4 Sn1_1 C1_3 C7_3 40.4(2) . . . . ? 
C1_5 Sn1_1 C1_3 C7_3 176.2(2) . . . . ? 
V1_1 Sn1_1 C1_3 C7_3 -71.4(2) . . . . ? 
C1_2 Sn1_1 C1_3 V1_1 0.33(11) . . . . ? 
C1_4 Sn1_1 C1_3 V1_1 111.87(13) . . . . ? 
C1_5 Sn1_1 C1_3 V1_1 -112.39(12) . . . . ? 
C7_3 C1_3 C2_3 C3_3 5.6(5) . . . . ? 
V1_1 C1_3 C2_3 C3_3 -44.0(3) . . . . ? 
Sn1_1 C1_3 C2_3 C3_3 -132.0(3) . . . . ? 
C7_3 C1_3 C2_3 V1_1 49.6(3) . . . . ? 
Sn1_1 C1_3 C2_3 V1_1 -88.07(14) . . . . ? 
C1_3 V1_1 C2_3 C3_3 145.7(3) . . . . ? 
C7_3 V1_1 C2_3 C3_3 119.9(2) . . . . ? 
C6_3 V1_1 C2_3 C3_3 88.1(2) . . . . ? 
C4_3 V1_1 C2_3 C3_3 20.03(19) . . . . ? 
C5_3 V1_1 C2_3 C3_3 50.5(2) . . . . ? 
C2_2 V1_1 C2_3 C3_3 -104.57(19) . . . . ? 
C1_2 V1_1 C2_3 C3_3 -142.19(19) . . . . ? 
C5_2 V1_1 C2_3 C3_3 -159.98(19) . . . . ? 
C3_2 V1_1 C2_3 C3_3 -80.5(2) . . . . ? 
C4_2 V1_1 C2_3 C3_3 -109.6(3) . . . . ? 
C7_3 V1_1 C2_3 C1_3 -25.82(16) . . . . ? 
C6_3 V1_1 C2_3 C1_3 -57.69(18) . . . . ? 
C3_3 V1_1 C2_3 C1_3 -145.7(3) . . . . ? 
C4_3 V1_1 C2_3 C1_3 -125.7(2) . . . . ? 
C5_3 V1_1 C2_3 C1_3 -95.27(18) . . . . ? 
C2_2 V1_1 C2_3 C1_3 109.68(17) . . . . ? 
C1_2 V1_1 C2_3 C1_3 72.06(18) . . . . ? 
C5_2 V1_1 C2_3 C1_3 54.3(2) . . . . ? 
C3_2 V1_1 C2_3 C1_3 133.77(17) . . . . ? 
C4_2 V1_1 C2_3 C1_3 104.6(3) . . . . ? 
C1_3 C2_3 C3_3 C4_3 1.5(6) . . . . ? 
V1_1 C2_3 C3_3 C4_3 -41.9(3) . . . . ? 
C1_3 C2_3 C3_3 V1_1 43.4(3) . . . . ? 
C1_3 V1_1 C3_3 C4_3 125.9(2) . . . . ? 
C7_3 V1_1 C3_3 C4_3 92.4(2) . . . . ? 
C2_3 V1_1 C3_3 C4_3 147.5(3) . . . . ? 
C6_3 V1_1 C3_3 C4_3 54.5(2) . . . . ? 
C5_3 V1_1 C3_3 C4_3 22.6(2) . . . . ? 
C2_2 V1_1 C3_3 C4_3 -130.2(2) . . . . ? 
C1_2 V1_1 C3_3 C4_3 -163.35(19) . . . . ? 
C5_2 V1_1 C3_3 C4_3 -151.4(4) . . . . ? 
C3_2 V1_1 C3_3 C4_3 -92.9(2) . . . . ? 
C4_2 V1_1 C3_3 C4_3 -72.1(3) . . . . ? 
C1_3 V1_1 C3_3 C2_3 -21.54(18) . . . . ? 
C7_3 V1_1 C3_3 C2_3 -55.1(2) . . . . ? 
C6_3 V1_1 C3_3 C2_3 -93.0(2) . . . . ? 
C4_3 V1_1 C3_3 C2_3 -147.5(3) . . . . ? 
C5_3 V1_1 C3_3 C2_3 -124.9(2) . . . . ? 
C2_2 V1_1 C3_3 C2_3 82.3(2) . . . . ? 
C1_2 V1_1 C3_3 C2_3 49.2(2) . . . . ? 
C5_2 V1_1 C3_3 C2_3 61.2(5) . . . . ? 
C3_2 V1_1 C3_3 C2_3 119.60(19) . . . . ? 
C4_2 V1_1 C3_3 C2_3 140.5(2) . . . . ? 
C2_3 C3_3 C4_3 C5_3 -4.9(6) . . . . ? 
V1_1 C3_3 C4_3 C5_3 -46.5(3) . . . . ? 
C2_3 C3_3 C4_3 V1_1 41.6(3) . . . . ? 
C1_3 V1_1 C4_3 C3_3 -50.7(2) . . . . ? 
C7_3 V1_1 C4_3 C3_3 -89.2(2) . . . . ? 
C2_3 V1_1 C4_3 C3_3 -20.31(19) . . . . ? 
C6_3 V1_1 C4_3 C3_3 -120.0(2) . . . . ? 
C5_3 V1_1 C4_3 C3_3 -143.3(3) . . . . ? 
C2_2 V1_1 C4_3 C3_3 64.4(2) . . . . ? 
C1_2 V1_1 C4_3 C3_3 42.6(4) . . . . ? 
C5_2 V1_1 C4_3 C3_3 159.7(3) . . . . ? 
C3_2 V1_1 C4_3 C3_3 101.4(2) . . . . ? 
C4_2 V1_1 C4_3 C3_3 138.4(2) . . . . ? 
C1_3 V1_1 C4_3 C5_3 92.5(2) . . . . ? 
C7_3 V1_1 C4_3 C5_3 54.1(2) . . . . ? 
C2_3 V1_1 C4_3 C5_3 123.0(2) . . . . ? 
C6_3 V1_1 C4_3 C5_3 23.3(2) . . . . ? 
C3_3 V1_1 C4_3 C5_3 143.3(3) . . . . ? 
C2_2 V1_1 C4_3 C5_3 -152.3(2) . . . . ? 
C1_2 V1_1 C4_3 C5_3 -174.1(3) . . . . ? 
C5_2 V1_1 C4_3 C5_3 -57.0(4) . . . . ? 
C3_2 V1_1 C4_3 C5_3 -115.3(2) . . . . ? 
C4_2 V1_1 C4_3 C5_3 -78.3(2) . . . . ? 
C3_3 C4_3 C5_3 C6_3 0.3(6) . . . . ? 
V1_1 C4_3 C5_3 C6_3 -46.0(3) . . . . ? 
C3_3 C4_3 C5_3 V1_1 46.4(3) . . . . ? 
C1_3 V1_1 C5_3 C4_3 -91.2(2) . . . . ? 
C7_3 V1_1 C5_3 C4_3 -121.6(2) . . . . ? 
C2_3 V1_1 C5_3 C4_3 -52.8(2) . . . . ? 
C6_3 V1_1 C5_3 C4_3 -142.5(3) . . . . ? 
C3_3 V1_1 C5_3 C4_3 -22.6(2) . . . . ? 
C2_2 V1_1 C5_3 C4_3 58.3(4) . . . . ? 
C1_2 V1_1 C5_3 C4_3 173.4(3) . . . . ? 
C5_2 V1_1 C5_3 C4_3 155.2(2) . . . . ? 
C3_2 V1_1 C5_3 C4_3 81.6(2) . . . . ? 
C4_2 V1_1 C5_3 C4_3 119.0(2) . . . . ? 
C1_3 V1_1 C5_3 C6_3 51.3(2) . . . . ? 
C7_3 V1_1 C5_3 C6_3 20.9(2) . . . . ? 
C2_3 V1_1 C5_3 C6_3 89.7(2) . . . . ? 
C3_3 V1_1 C5_3 C6_3 119.9(2) . . . . ? 
C4_3 V1_1 C5_3 C6_3 142.5(3) . . . . ? 
C2_2 V1_1 C5_3 C6_3 -159.3(3) . . . . ? 
C1_2 V1_1 C5_3 C6_3 -44.1(5) . . . . ? 
C5_2 V1_1 C5_3 C6_3 -62.3(3) . . . . ? 
C3_2 V1_1 C5_3 C6_3 -136.0(2) . . . . ? 
C4_2 V1_1 C5_3 C6_3 -98.5(2) . . . . ? 
C4_3 C5_3 C6_3 C7_3 3.7(6) . . . . ? 
V1_1 C5_3 C6_3 C7_3 -42.5(3) . . . . ? 
C4_3 C5_3 C6_3 V1_1 46.2(3) . . . . ? 
C1_3 V1_1 C6_3 C5_3 -125.5(2) . . . . ? 
C7_3 V1_1 C6_3 C5_3 -146.5(3) . . . . ? 
C2_3 V1_1 C6_3 C5_3 -92.2(2) . . . . ? 
C3_3 V1_1 C6_3 C5_3 -54.5(2) . . . . ? 
C4_3 V1_1 C6_3 C5_3 -23.0(2) . . . . ? 
C2_2 V1_1 C6_3 C5_3 143.1(5) . . . . ? 
C1_2 V1_1 C6_3 C5_3 164.5(2) . . . . ? 
C5_2 V1_1 C6_3 C5_3 133.0(2) . . . . ? 
C3_2 V1_1 C6_3 C5_3 72.9(3) . . . . ? 
C4_2 V1_1 C6_3 C5_3 95.3(2) . . . . ? 
C1_3 V1_1 C6_3 C7_3 21.02(19) . . . . ? 
C2_3 V1_1 C6_3 C7_3 54.4(2) . . . . ? 
C3_3 V1_1 C6_3 C7_3 92.0(2) . . . . ? 
C4_3 V1_1 C6_3 C7_3 123.5(2) . . . . ? 
C5_3 V1_1 C6_3 C7_3 146.5(3) . . . . ? 
C2_2 V1_1 C6_3 C7_3 -70.4(5) . . . . ? 
C1_2 V1_1 C6_3 C7_3 -49.0(2) . . . . ? 
C5_2 V1_1 C6_3 C7_3 -80.5(2) . . . . ? 
C3_2 V1_1 C6_3 C7_3 -140.6(2) . . . . ? 
C4_2 V1_1 C6_3 C7_3 -118.2(2) . . . . ? 
C5_3 C6_3 C7_3 C1_3 0.3(6) . . . . ? 
V1_1 C6_3 C7_3 C1_3 -42.6(3) . . . . ? 
C5_3 C6_3 C7_3 V1_1 42.9(3) . . . . ? 
C2_3 C1_3 C7_3 C6_3 -6.5(5) . . . . ? 
V1_1 C1_3 C7_3 C6_3 43.1(3) . . . . ? 
Sn1_1 C1_3 C7_3 C6_3 130.1(3) . . . . ? 
C2_3 C1_3 C7_3 V1_1 -49.6(3) . . . . ? 
Sn1_1 C1_3 C7_3 V1_1 87.05(14) . . . . ? 
C1_3 V1_1 C7_3 C6_3 -146.6(3) . . . . ? 
C2_3 V1_1 C7_3 C6_3 -120.8(2) . . . . ? 
C3_3 V1_1 C7_3 C6_3 -88.8(2) . . . . ? 
C4_3 V1_1 C7_3 C6_3 -51.7(2) . . . . ? 
C5_3 V1_1 C7_3 C6_3 -20.7(2) . . . . ? 
C2_2 V1_1 C7_3 C6_3 159.4(2) . . . . ? 
C1_2 V1_1 C7_3 C6_3 143.2(2) . . . . ? 
C5_2 V1_1 C7_3 C6_3 106.3(2) . . . . ? 
C3_2 V1_1 C7_3 C6_3 103.3(3) . . . . ? 
C4_2 V1_1 C7_3 C6_3 80.4(2) . . . . ? 
C2_3 V1_1 C7_3 C1_3 25.78(16) . . . . ? 
C6_3 V1_1 C7_3 C1_3 146.6(3) . . . . ? 
C3_3 V1_1 C7_3 C1_3 57.79(19) . . . . ? 
C4_3 V1_1 C7_3 C1_3 94.91(19) . . . . ? 
C5_3 V1_1 C7_3 C1_3 125.9(2) . . . . ? 
C2_2 V1_1 C7_3 C1_3 -54.0(2) . . . . ? 
C1_2 V1_1 C7_3 C1_3 -70.21(18) . . . . ? 
C5_2 V1_1 C7_3 C1_3 -107.09(17) . . . . ? 
C3_2 V1_1 C7_3 C1_3 -110.1(3) . . . . ? 
C4_2 V1_1 C7_3 C1_3 -133.06(18) . . . . ? 
C1_2 Sn1_1 C1_4 C4_4 67.7(3) . . . . ? 
C1_3 Sn1_1 C1_4 C4_4 -29.7(3) . . . . ? 
C1_5 Sn1_1 C1_4 C4_4 -165.5(3) . . . . ? 
V1_1 Sn1_1 C1_4 C4_4 19.2(3) . . . . ? 
C1_2 Sn1_1 C1_4 C2_4 -172.2(2) . . . . ? 
C1_3 Sn1_1 C1_4 C2_4 90.5(3) . . . . ? 
C1_5 Sn1_1 C1_4 C2_4 -45.4(3) . . . . ? 
V1_1 Sn1_1 C1_4 C2_4 139.3(2) . . . . ? 
C1_2 Sn1_1 C1_4 C3_4 -51.4(3) . . . . ? 
C1_3 Sn1_1 C1_4 C3_4 -148.7(3) . . . . ? 
C1_5 Sn1_1 C1_4 C3_4 75.5(3) . . . . ? 
V1_1 Sn1_1 C1_4 C3_4 -99.8(3) . . . . ? 
C1_2 Sn1_1 C1_5 C2_5 -147.4(2) . . . . ? 
C1_3 Sn1_1 C1_5 C2_5 -50.6(3) . . . . ? 
C1_4 Sn1_1 C1_5 C2_5 86.5(3) . . . . ? 
V1_1 Sn1_1 C1_5 C2_5 -98.1(2) . . . . ? 
C1_2 Sn1_1 C1_5 C3_5 -25.4(3) . . . . ? 
C1_3 Sn1_1 C1_5 C3_5 71.4(3) . . . . ? 
C1_4 Sn1_1 C1_5 C3_5 -151.5(2) . . . . ? 
V1_1 Sn1_1 C1_5 C3_5 23.9(3) . . . . ? 
C1_2 Sn1_1 C1_5 C4_5 94.2(3) . . . . ? 
C1_3 Sn1_1 C1_5 C4_5 -169.0(2) . . . . ? 
C1_4 Sn1_1 C1_5 C4_5 -31.9(3) . . . . ? 
V1_1 Sn1_1 C1_5 C4_5 143.4(2) . . . . ? 
 
_diffrn_measured_fraction_theta_max    0.985 
_diffrn_reflns_theta_full              26.00 
_diffrn_measured_fraction_theta_full   0.988 
_refine_diff_density_max    0.895 
_refine_diff_density_min   -0.349 
_refine_diff_density_rms    0.092 


#################################################


data_11 

# 1. Submission Details

_publ_contact_author_name   'Prof. Dr. Holger Braunschweig'
_publ_contact_author_address
; Institut fuer Anorganische Chemie
Universitaet Wuerzburg
Am Hubland
97074 Wuerzburg, Germany
;
_publ_contact_author_email         'H.Braunschweig@mail.uni-wuerzburg.de'
_publ_contact_author_fax           +49-931-3184623
_publ_contact_author_phone         +49-931-3185260

_publ_requested_journal            ?
_publ_requested_category           ?
_publ_requested_coeditor_name      ?

_publ_contact_letter
; ?
;

_publ_section_title
;?
;

_publ_section_abstract
;?
;

loop_
_publ_author_name
_publ_author_address
      'Braunschweig, Holger'
;     Institut fuer Anorganische Chemie
      Universitaet Wuerzburg
      Am Hubland
      D-97074 Wuerzburg, Germany
;
      'Nachname, Vorname'
;     Institut fuer Anorganische Chemie
      Universitaet Wuerzburg
      Am Hubland
      D-97074 Wuerzburg, Germany
;
      'Kramer, Thomas'
;     Institut fuer Anorganische Chemie
      Universitaet Wuerzburg
      Am Hubland
      D-97074 Wuerzburg, Germany
;
 
_audit_creation_method            SHELXL-97 
_chemical_name_systematic 
; 
?
; 
_chemical_name_common             
;
?
; 
_chemical_melting_point           ? 
_chemical_formula_moiety          
'C32 H58 P2 Pt Sn V'
 
_chemical_formula_sum 
 'C32 H58 P2 Pt Sn V'
_chemical_formula_weight          869.44 
 
loop_ 
 _atom_type_symbol 
 _atom_type_description 
 _atom_type_scat_dispersion_real 
 _atom_type_scat_dispersion_imag 
 _atom_type_scat_source 
 'C'  'C'   0.0033   0.0016 
 'International Tables Vol C Tables 4.2.6.8 and 6.1.1.4' 
 'H'  'H'   0.0000   0.0000 
 'International Tables Vol C Tables 4.2.6.8 and 6.1.1.4' 
 'P'  'P'   0.1023   0.0942 
 'International Tables Vol C Tables 4.2.6.8 and 6.1.1.4' 
 'V'  'V'   0.3005   0.5294 
 'International Tables Vol C Tables 4.2.6.8 and 6.1.1.4' 
 'Sn'  'Sn'  -0.6537   1.4246 
 'International Tables Vol C Tables 4.2.6.8 and 6.1.1.4' 
 'Pt'  'Pt'  -1.7033   8.3905 
 'International Tables Vol C Tables 4.2.6.8 and 6.1.1.4' 
 
_symmetry_cell_setting            'Monoclinic' 
_symmetry_space_group_name_H-M    'P2(1)/c'
_symmetry_space_group_name_Hall   '-P 2ybc' 
 
loop_ 
 _symmetry_equiv_pos_as_xyz 
 'x, y, z' 
 '-x, y+1/2, -z+1/2' 
 '-x, -y, -z' 
 'x, -y-1/2, z-1/2' 
 
_cell_length_a                    21.9178(14) 
_cell_length_b                    18.6844(11) 
_cell_length_c                    17.9740(11) 
_cell_angle_alpha                 90.00 
_cell_angle_beta                  109.179(3) 
_cell_angle_gamma                 90.00 
_cell_volume                      6952.2(7) 
_cell_formula_units_Z             8 
_cell_measurement_temperature     100(2) 
_cell_measurement_reflns_used     5926 
_cell_measurement_theta_min       2.27 
_cell_measurement_theta_max       25.93 
 
_exptl_crystal_description        'block' 
_exptl_crystal_colour             'orange' 
_exptl_crystal_size_max           0.18 
_exptl_crystal_size_mid           0.10 
_exptl_crystal_size_min           0.05 
_exptl_crystal_density_meas       ? 
_exptl_crystal_density_diffrn     1.661 
_exptl_crystal_density_method     'not measured' 
_exptl_crystal_F_000              3448 
_exptl_absorpt_coefficient_mu     5.102 
_exptl_absorpt_correction_type    'multi-scan' 
_exptl_absorpt_correction_T_min   0.5690
_exptl_absorpt_correction_T_max   0.7453
_exptl_absorpt_process_details    'Sadabs 2008/1 (Bruker 2008)' 
 
_exptl_special_details 
; 
 The crystal was immersed in a film of perfluoropolyether oil, mounted
on a polyimide microloop (MicroMounts of MiTeGen) and transferred to
stream of cold nitrogen (Oxford Cryostream 700). 
; 
 
_diffrn_ambient_temperature       100(2) 
_diffrn_radiation_wavelength      0.71073 
_diffrn_radiation_type            MoK\a 
_diffrn_radiation_source          'rotating anode' 
_diffrn_radiation_monochromator   'multi-layer mirror' 
_diffrn_measurement_device_type   'Bruker X8-APEX II' 
_diffrn_measurement_method        '\f and \w scans' 
_diffrn_detector_area_resol_mean  8.333 
_diffrn_reflns_number             73931 
_diffrn_reflns_av_R_equivalents   0.0978 
_diffrn_reflns_av_sigmaI/netI     0.0794 
_diffrn_reflns_limit_h_min        -27 
_diffrn_reflns_limit_h_max        24 
_diffrn_reflns_limit_k_min        -23 
_diffrn_reflns_limit_k_max        21 
_diffrn_reflns_limit_l_min        -21 
_diffrn_reflns_limit_l_max        22 
_diffrn_reflns_theta_min          0.98 
_diffrn_reflns_theta_max          26.04 
_reflns_number_total              13538 
_reflns_number_gt                 9797 
_reflns_threshold_expression      >2sigma(I) 
 
_computing_data_collection        'APEX2 ver. 2010.3 (Bruker AXS)' 
_computing_cell_refinement        'Saint+ ver. 7.68A (Bruker AXS)' 
_computing_data_reduction         'Saint+ ver. 7.68A (Bruker AXS)' 
_computing_structure_solution     'SHELXS-97 (Sheldrick, 2008)' 
_computing_structure_refinement   'SHELXL-97 (Sheldrick, 2008)' 
_computing_molecular_graphics     'XP ver. 5.1 (Bruker AXS, 1998)' 
_computing_publication_material   'SHELXL-97 (Sheldrick, 2008)' 
 
_refine_special_details 
; 
 Refinement of F^2^ against ALL reflections.  The weighted R-factor wR and 
 goodness of fit S are based on F^2^, conventional R-factors R are based 
 on F, with F set to zero for negative F^2^. The threshold expression of 
 F^2^ > 2sigma(F^2^) is used only for calculating R-factors(gt) etc. and is 
 not relevant to the choice of reflections for refinement.  R-factors based 
 on F^2^ are statistically about twice as large as those based on F, and R- 
 factors based on ALL data will be even larger. 
; 
 
_refine_ls_structure_factor_coef  Fsqd  
_refine_ls_matrix_type            full 
_refine_ls_weighting_scheme       calc  
_refine_ls_weighting_details 
 'calc w=1/[\s^2^(Fo^2^)+(0.0407P)^2^+54.8281P] where P=(Fo^2^+2Fc^2^)/3' 
_atom_sites_solution_primary      direct 
_atom_sites_solution_secondary    difmap 
_atom_sites_solution_hydrogens    geom 
_refine_ls_hydrogen_treatment     constr 
_refine_ls_extinction_method      none 
_refine_ls_extinction_coef        ? 
_refine_ls_number_reflns          13538 
_refine_ls_number_parameters      691 
_refine_ls_number_restraints      12 
_refine_ls_R_factor_all           0.0709 
_refine_ls_R_factor_gt            0.0402 
_refine_ls_wR_factor_ref          0.0965 
_refine_ls_wR_factor_gt           0.0818 
_refine_ls_goodness_of_fit_ref    0.869 
_refine_ls_restrained_S_all       0.869 
_refine_ls_shift/su_max           0.001 
_refine_ls_shift/su_mean          0.000 
 
loop_ 
 _atom_site_label 
 _atom_site_type_symbol 
 _atom_site_fract_x 
 _atom_site_fract_y 
 _atom_site_fract_z 
 _atom_site_U_iso_or_equiv 
 _atom_site_adp_type 
 _atom_site_occupancy 
 _atom_site_symmetry_multiplicity 
 _atom_site_calc_flag 
 _atom_site_refinement_flags 
 _atom_site_disorder_assembly 
 _atom_site_disorder_group 
Pt1 Pt 0.464288(13) 0.286571(16) 0.608139(15) 0.01051(7) Uani 1 1 d . . . 
Sn1 Sn 0.35050(2) 0.22302(3) 0.54542(3) 0.01212(11) Uani 1 1 d . . . 
V1 V 0.30454(6) 0.40305(7) 0.59450(7) 0.0127(3) Uani 1 1 d . . . 
C16 C 0.2651(3) 0.3072(4) 0.6269(4) 0.0157(17) Uani 1 1 d . . . 
H16 H 0.2830 0.2738 0.6682 0.019 Uiso 1 1 calc R . . 
C1 C 0.4070(3) 0.3748(4) 0.6126(4) 0.0141(16) Uani 1 1 d . . . 
C5 C 0.3692(4) 0.4563(5) 0.6978(4) 0.0213(18) Uani 1 1 d . . . 
H5 H 0.3636 0.4657 0.7471 0.026 Uiso 1 1 calc R . . 
C15 C 0.2300(3) 0.3670(4) 0.6407(4) 0.0186(18) Uani 1 1 d . . . 
H15 H 0.2252 0.3730 0.6910 0.022 Uiso 1 1 calc R . . 
C2 C 0.3847(3) 0.4260(4) 0.5513(4) 0.0146(16) Uani 1 1 d . . . 
H2 H 0.3890 0.4161 0.5015 0.017 Uiso 1 1 calc R . . 
C34 C 0.3464(4) 0.2779(5) 0.3819(4) 0.025(2) Uani 1 1 d . . . 
H34A H 0.3393 0.2717 0.3255 0.038 Uiso 1 1 calc R . . 
H34B H 0.3921 0.2885 0.4094 0.038 Uiso 1 1 calc R . . 
H34C H 0.3198 0.3175 0.3896 0.038 Uiso 1 1 calc R . . 
C11 C 0.2742(3) 0.2962(4) 0.5527(4) 0.0170(17) Uani 1 1 d . . . 
C31 C 0.3279(4) 0.2093(4) 0.4150(4) 0.0185(17) Uani 1 1 d . . . 
C3 C 0.3561(3) 0.4915(4) 0.5624(5) 0.0197(17) Uani 1 1 d . . . 
H3 H 0.3416 0.5248 0.5202 0.024 Uiso 1 1 calc R . . 
C33 C 0.3666(4) 0.1482(4) 0.3955(4) 0.0206(18) Uani 1 1 d . . . 
H33A H 0.3572 0.1035 0.4181 0.031 Uiso 1 1 calc R . . 
H33B H 0.4129 0.1588 0.4177 0.031 Uiso 1 1 calc R . . 
H33C H 0.3545 0.1432 0.3382 0.031 Uiso 1 1 calc R . . 
C32 C 0.2563(4) 0.1938(5) 0.3758(5) 0.027(2) Uani 1 1 d . . . 
H32A H 0.2308 0.2288 0.3938 0.040 Uiso 1 1 calc R . . 
H32B H 0.2466 0.1455 0.3900 0.040 Uiso 1 1 calc R . . 
H32C H 0.2453 0.1973 0.3185 0.040 Uiso 1 1 calc R . . 
C6 C 0.3976(3) 0.3910(4) 0.6857(4) 0.0150(16) Uani 1 1 d . . . 
H6 H 0.4106 0.3571 0.7273 0.018 Uiso 1 1 calc R . . 
C4 C 0.3492(3) 0.5074(4) 0.6361(4) 0.0187(17) Uani 1 1 d U . . 
H4 H 0.3313 0.5518 0.6443 0.022 Uiso 1 1 calc R . . 
Pt2 Pt 0.032968(13) 0.674279(16) 0.855617(15) 0.01097(7) Uani 1 1 d . . . 
Sn2 Sn 0.15132(2) 0.71988(3) 0.93697(3) 0.01191(11) Uani 1 1 d . . . 
V2 V 0.18250(6) 0.58640(7) 0.80306(7) 0.0153(3) Uani 1 1 d . . . 
C74 C 0.2788(3) 0.5861(5) 0.7945(5) 0.0220(19) Uani 1 1 d . . . 
H74 H 0.2958 0.5573 0.7624 0.026 Uiso 1 1 calc R . . 
C87 C 0.1388(4) 0.7140(5) 1.1046(4) 0.0222(19) Uani 1 1 d . . . 
H87A H 0.0926 0.7075 1.0762 0.033 Uiso 1 1 calc R . . 
H87B H 0.1491 0.7652 1.1089 0.033 Uiso 1 1 calc R . . 
H87C H 0.1496 0.6933 1.1574 0.033 Uiso 1 1 calc R . . 
C62 C 0.0854(3) 0.6153(5) 0.7316(4) 0.0206(18) Uani 1 1 d . . . 
H62 H 0.0703 0.6600 0.7073 0.025 Uiso 1 1 calc R . . 
C71 C 0.2207(3) 0.6694(4) 0.8887(4) 0.0136(16) Uani 1 1 d . . . 
C61 C 0.0829(3) 0.6018(4) 0.8077(4) 0.0149(16) Uani 1 1 d . . . 
C63 C 0.1099(4) 0.5639(5) 0.6898(5) 0.0232(19) Uani 1 1 d . . . 
H63 H 0.1100 0.5739 0.6380 0.028 Uiso 1 1 calc R . . 
C88 C 0.1626(4) 0.5970(4) 1.0553(4) 0.0219(18) Uani 1 1 d . . . 
H88A H 0.1896 0.5717 1.0300 0.033 Uiso 1 1 calc R . . 
H88B H 0.1170 0.5898 1.0247 0.033 Uiso 1 1 calc R . . 
H88C H 0.1711 0.5783 1.1087 0.033 Uiso 1 1 calc R . . 
C66 C 0.1098(3) 0.5355(4) 0.8444(4) 0.0152(16) Uani 1 1 d U . . 
H66 H 0.1108 0.5255 0.8966 0.018 Uiso 1 1 calc R . . 
C76 C 0.2548(3) 0.6051(4) 0.9175(5) 0.0196(17) Uani 1 1 d . . . 
H76 H 0.2590 0.5892 0.9692 0.024 Uiso 1 1 calc R . . 
C72 C 0.2202(3) 0.6935(4) 0.8125(4) 0.0161(17) Uani 1 1 d . . . 
H72 H 0.2003 0.7380 0.7928 0.019 Uiso 1 1 calc R . . 
C85 C 0.1782(4) 0.6765(4) 1.0595(4) 0.0194(17) Uani 1 1 d . . . 
C75 C 0.2830(3) 0.5639(4) 0.8704(4) 0.0180(17) Uani 1 1 d . . . 
H75 H 0.3050 0.5207 0.8909 0.022 Uiso 1 1 calc R . . 
C73 C 0.2485(3) 0.6527(4) 0.7661(4) 0.0168(17) Uani 1 1 d . . . 
H73 H 0.2474 0.6698 0.7159 0.020 Uiso 1 1 calc R . . 
C86 C 0.2501(4) 0.6877(5) 1.1039(4) 0.0250(19) Uani 1 1 d . . . 
H86A H 0.2608 0.6682 1.1572 0.037 Uiso 1 1 calc R . . 
H86B H 0.2599 0.7390 1.1069 0.037 Uiso 1 1 calc R . . 
H86C H 0.2757 0.6632 1.0760 0.037 Uiso 1 1 calc R . . 
C64 C 0.1341(4) 0.4979(5) 0.7262(5) 0.027(2) Uani 1 1 d . . . 
H64 H 0.1497 0.4629 0.6984 0.032 Uiso 1 1 calc R . . 
P2 P 0.54750(9) 0.37374(11) 0.64137(11) 0.0132(4) Uani 1 1 d . . . 
P1 P 0.52937(9) 0.18839(11) 0.61768(11) 0.0134(4) Uani 1 1 d . . . 
P3 P -0.02406(9) 0.76395(11) 0.89020(11) 0.0150(4) Uani 1 1 d . . . 
P4 P -0.05600(9) 0.60389(11) 0.78357(11) 0.0144(4) Uani 1 1 d . . . 
C105 C -0.1377(3) 0.6203(4) 0.7878(4) 0.0177(17) Uani 1 1 d . . . 
H10A H -0.1357 0.6166 0.8434 0.021 Uiso 1 1 calc R . . 
H10B H -0.1498 0.6703 0.7708 0.021 Uiso 1 1 calc R . . 
C51 C 0.5435(4) 0.4426(4) 0.7120(4) 0.0196(18) Uani 1 1 d . . . 
H51A H 0.5743 0.4813 0.7118 0.023 Uiso 1 1 calc R . . 
H51B H 0.4996 0.4634 0.6949 0.023 Uiso 1 1 calc R . . 
C81 C 0.1938(3) 0.8324(4) 0.9491(4) 0.0192(18) Uani 1 1 d . . . 
C13 C 0.2081(3) 0.4070(5) 0.5056(5) 0.0226(19) Uani 1 1 d . . . 
H13 H 0.1885 0.4399 0.4644 0.027 Uiso 1 1 calc R . . 
C12 C 0.2434(3) 0.3470(4) 0.4917(4) 0.0174(17) Uani 1 1 d . . . 
H12 H 0.2467 0.3405 0.4407 0.021 Uiso 1 1 calc R . . 
C43 C 0.5865(3) 0.1892(4) 0.5631(4) 0.0160(17) Uani 1 1 d . . . 
H43A H 0.6106 0.2349 0.5740 0.019 Uiso 1 1 calc R . . 
H43B H 0.6181 0.1501 0.5834 0.019 Uiso 1 1 calc R . . 
C82 C 0.2656(3) 0.8241(5) 0.9591(5) 0.0213(18) Uani 1 1 d . . . 
H82A H 0.2851 0.8715 0.9606 0.032 Uiso 1 1 calc R . . 
H82B H 0.2701 0.7968 0.9147 0.032 Uiso 1 1 calc R . . 
H82C H 0.2874 0.7987 1.0084 0.032 Uiso 1 1 calc R . . 
C93 C -0.0696(4) 0.8131(4) 0.8012(4) 0.0190(17) Uani 1 1 d . . . 
H93A H -0.1006 0.7802 0.7644 0.023 Uiso 1 1 calc R . . 
H93B H -0.0947 0.8517 0.8154 0.023 Uiso 1 1 calc R . . 
C55 C 0.5393(4) 0.4270(4) 0.5527(4) 0.0193(18) Uani 1 1 d . . . 
H55A H 0.4990 0.4553 0.5397 0.023 Uiso 1 1 calc R . . 
H55B H 0.5758 0.4612 0.5647 0.023 Uiso 1 1 calc R . . 
C91 C -0.0858(4) 0.7433(5) 0.9350(5) 0.0224(18) Uani 1 1 d . . . 
H91A H -0.0985 0.7880 0.9554 0.027 Uiso 1 1 calc R . . 
H91B H -0.1245 0.7242 0.8939 0.027 Uiso 1 1 calc R . . 
C45 C 0.4917(3) 0.1002(4) 0.5915(4) 0.0175(17) Uani 1 1 d . . . 
H45A H 0.4638 0.0914 0.6242 0.021 Uiso 1 1 calc R . . 
H45B H 0.4632 0.1020 0.5359 0.021 Uiso 1 1 calc R . . 
C41 C 0.5808(4) 0.1753(4) 0.7200(4) 0.0201(17) Uani 1 1 d . . . 
H41A H 0.6047 0.1297 0.7237 0.024 Uiso 1 1 calc R . . 
H41B H 0.6130 0.2144 0.7348 0.024 Uiso 1 1 calc R . . 
C103 C -0.0690(4) 0.6019(5) 0.6777(4) 0.0218(19) Uani 1 1 d . . . 
H10C H -0.0305 0.5806 0.6691 0.026 Uiso 1 1 calc R . . 
H10D H -0.1063 0.5705 0.6520 0.026 Uiso 1 1 calc R . . 
C84 C 0.1613(4) 0.8761(4) 0.8741(5) 0.0248(19) Uani 1 1 d . . . 
H84A H 0.1156 0.8829 0.8677 0.037 Uiso 1 1 calc R . . 
H84B H 0.1653 0.8505 0.8283 0.037 Uiso 1 1 calc R . . 
H84C H 0.1825 0.9229 0.8785 0.037 Uiso 1 1 calc R . . 
C95 C 0.0222(4) 0.8343(4) 0.9561(5) 0.0201(18) Uani 1 1 d . . . 
H95A H 0.0398 0.8138 1.0097 0.024 Uiso 1 1 calc R . . 
H95B H 0.0594 0.8469 0.9390 0.024 Uiso 1 1 calc R . . 
C36 C 0.2428(4) 0.1296(5) 0.5742(5) 0.028(2) Uani 1 1 d . . . 
H36A H 0.2270 0.0858 0.5917 0.042 Uiso 1 1 calc R . . 
H36B H 0.2210 0.1360 0.5175 0.042 Uiso 1 1 calc R . . 
H36C H 0.2336 0.1707 0.6027 0.042 Uiso 1 1 calc R . . 
C35 C 0.3164(3) 0.1237(4) 0.5912(4) 0.0160(16) Uani 1 1 d . . . 
C101 C -0.0439(4) 0.5095(4) 0.8098(5) 0.0198(17) Uani 1 1 d . . . 
H10E H -0.0830 0.4825 0.7793 0.024 Uiso 1 1 calc R . . 
H10F H -0.0072 0.4912 0.7948 0.024 Uiso 1 1 calc R . . 
C38 C 0.3500(4) 0.1161(5) 0.6795(4) 0.0233(19) Uani 1 1 d . . . 
H38A H 0.3316 0.0754 0.6992 0.035 Uiso 1 1 calc R . . 
H38B H 0.3439 0.1600 0.7061 0.035 Uiso 1 1 calc R . . 
H38C H 0.3963 0.1080 0.6901 0.035 Uiso 1 1 calc R . . 
C83 C 0.1900(4) 0.8746(4) 1.0202(4) 0.0236(19) Uani 1 1 d . . . 
H83A H 0.2094 0.8465 1.0682 0.035 Uiso 1 1 calc R . . 
H83B H 0.1447 0.8845 1.0139 0.035 Uiso 1 1 calc R . . 
H83C H 0.2135 0.9198 1.0240 0.035 Uiso 1 1 calc R . . 
C102 C -0.0305(4) 0.4961(5) 0.8972(5) 0.030(2) Uani 1 1 d . . . 
H10G H 0.0066 0.5250 0.9278 0.045 Uiso 1 1 calc R . . 
H10H H -0.0209 0.4453 0.9088 0.045 Uiso 1 1 calc R . . 
H10I H -0.0685 0.5095 0.9114 0.045 Uiso 1 1 calc R . . 
C14 C 0.2023(3) 0.4172(5) 0.5809(5) 0.0214(18) Uani 1 1 d . . . 
H14 H 0.1800 0.4576 0.5909 0.026 Uiso 1 1 calc R . . 
C53 C 0.6345(3) 0.3538(4) 0.6781(5) 0.0227(19) Uani 1 1 d . . . 
H53A H 0.6433 0.3245 0.7263 0.027 Uiso 1 1 calc R . . 
H53B H 0.6446 0.3238 0.6382 0.027 Uiso 1 1 calc R . . 
C92 C -0.0635(4) 0.6886(4) 1.0025(5) 0.0239(19) Uani 1 1 d . . . 
H92A H -0.0557 0.6424 0.9816 0.036 Uiso 1 1 calc R . . 
H92B H -0.0971 0.6832 1.0271 0.036 Uiso 1 1 calc R . . 
H92C H -0.0235 0.7055 1.0418 0.036 Uiso 1 1 calc R . . 
C104 C -0.0814(4) 0.6747(5) 0.6386(5) 0.029(2) Uani 1 1 d . . . 
H10J H -0.1221 0.6940 0.6416 0.043 Uiso 1 1 calc R . . 
H10K H -0.0841 0.6701 0.5833 0.043 Uiso 1 1 calc R . . 
H10L H -0.0459 0.7072 0.6657 0.043 Uiso 1 1 calc R . . 
C44 C 0.5562(4) 0.1805(5) 0.4733(5) 0.027(2) Uani 1 1 d . . . 
H44A H 0.5362 0.1331 0.4614 0.041 Uiso 1 1 calc R . . 
H44B H 0.5898 0.1854 0.4487 0.041 Uiso 1 1 calc R . . 
H44C H 0.5232 0.2175 0.4527 0.041 Uiso 1 1 calc R . . 
C65 C 0.1351(4) 0.4841(5) 0.8030(5) 0.026(2) Uani 1 1 d . . . 
H65 H 0.1526 0.4404 0.8279 0.031 Uiso 1 1 calc R . . 
C37 C 0.3252(4) 0.0540(4) 0.5497(5) 0.0239(19) Uani 1 1 d . . . 
H37A H 0.3708 0.0482 0.5547 0.036 Uiso 1 1 calc R . . 
H37B H 0.2991 0.0564 0.4938 0.036 Uiso 1 1 calc R . . 
H37C H 0.3112 0.0131 0.5742 0.036 Uiso 1 1 calc R . . 
C94 C -0.0248(4) 0.8458(5) 0.7601(5) 0.029(2) Uani 1 1 d . . . 
H94A H 0.0009 0.8842 0.7928 0.044 Uiso 1 1 calc R . . 
H94B H -0.0508 0.8654 0.7089 0.044 Uiso 1 1 calc R . . 
H94C H 0.0041 0.8087 0.7522 0.044 Uiso 1 1 calc R . . 
C52 C 0.5592(4) 0.4143(5) 0.7958(4) 0.031(2) Uani 1 1 d . . . 
H52A H 0.5284 0.3766 0.7967 0.047 Uiso 1 1 calc R . . 
H52B H 0.5561 0.4535 0.8306 0.047 Uiso 1 1 calc R . . 
H52C H 0.6031 0.3948 0.8138 0.047 Uiso 1 1 calc R . . 
C42 C 0.5446(4) 0.1733(6) 0.7794(5) 0.037(2) Uani 1 1 d . . . 
H42A H 0.5169 0.2157 0.7724 0.055 Uiso 1 1 calc R . . 
H42B H 0.5757 0.1730 0.8330 0.055 Uiso 1 1 calc R . . 
H42C H 0.5179 0.1300 0.7710 0.055 Uiso 1 1 calc R . . 
C106 C -0.1923(4) 0.5706(5) 0.7380(5) 0.0244(19) Uani 1 1 d . . . 
H10M H -0.1968 0.5755 0.6821 0.037 Uiso 1 1 calc R . . 
H10N H -0.2331 0.5839 0.7457 0.037 Uiso 1 1 calc R . . 
H10O H -0.1817 0.5208 0.7544 0.037 Uiso 1 1 calc R . . 
C46 C 0.5373(4) 0.0361(4) 0.6009(5) 0.0239(19) Uani 1 1 d . . . 
H46A H 0.5662 0.0445 0.5703 0.036 Uiso 1 1 calc R . . 
H46B H 0.5119 -0.0073 0.5818 0.036 Uiso 1 1 calc R . . 
H46C H 0.5628 0.0303 0.6566 0.036 Uiso 1 1 calc R . . 
C56 C 0.5381(4) 0.3835(5) 0.4812(4) 0.027(2) Uani 1 1 d . . . 
H56A H 0.5767 0.3532 0.4942 0.041 Uiso 1 1 calc R . . 
H56B H 0.5374 0.4159 0.4380 0.041 Uiso 1 1 calc R . . 
H56C H 0.4994 0.3533 0.4650 0.041 Uiso 1 1 calc R . . 
C96 C -0.0131(4) 0.9038(4) 0.9619(5) 0.0254(19) Uani 1 1 d . . . 
H96A H -0.0261 0.9285 0.9110 0.038 Uiso 1 1 calc R . . 
H96B H 0.0157 0.9347 1.0024 0.038 Uiso 1 1 calc R . . 
H96C H -0.0516 0.8926 0.9761 0.038 Uiso 1 1 calc R . . 
C54 C 0.6818(4) 0.4171(5) 0.6974(5) 0.027(2) Uani 1 1 d . . . 
H54A H 0.6710 0.4500 0.6525 0.040 Uiso 1 1 calc R . . 
H54B H 0.7260 0.3994 0.7084 0.040 Uiso 1 1 calc R . . 
H54C H 0.6786 0.4424 0.7438 0.040 Uiso 1 1 calc R . . 
 
loop_ 
 _atom_site_aniso_label 
 _atom_site_aniso_U_11 
 _atom_site_aniso_U_22 
 _atom_site_aniso_U_33 
 _atom_site_aniso_U_23 
 _atom_site_aniso_U_13 
 _atom_site_aniso_U_12 
Pt1 0.00971(14) 0.01119(17) 0.01119(14) 0.00047(11) 0.00422(11) 0.00104(11) 
Sn1 0.0111(2) 0.0127(3) 0.0131(2) -0.0011(2) 0.0048(2) -0.0007(2) 
V1 0.0112(6) 0.0133(8) 0.0133(6) -0.0011(5) 0.0036(5) 0.0012(5) 
C16 0.015(4) 0.015(5) 0.021(4) 0.005(3) 0.012(3) 0.000(3) 
C1 0.013(4) 0.014(5) 0.015(4) 0.000(3) 0.005(3) -0.003(3) 
C5 0.016(4) 0.028(5) 0.020(4) -0.005(4) 0.005(3) -0.002(3) 
C15 0.014(4) 0.026(5) 0.022(4) -0.004(3) 0.014(3) -0.003(3) 
C2 0.015(4) 0.016(5) 0.013(4) 0.000(3) 0.005(3) 0.003(3) 
C34 0.028(5) 0.033(6) 0.015(4) 0.004(4) 0.008(4) 0.007(4) 
C11 0.010(4) 0.020(5) 0.021(4) -0.006(3) 0.006(3) -0.006(3) 
C31 0.019(4) 0.022(5) 0.010(4) 0.004(3) 0.000(3) 0.004(3) 
C3 0.016(4) 0.014(5) 0.026(4) 0.005(3) 0.004(3) -0.004(3) 
C33 0.028(4) 0.019(5) 0.016(4) -0.001(3) 0.007(3) 0.001(4) 
C32 0.023(4) 0.025(6) 0.026(4) -0.013(4) 0.000(4) -0.005(4) 
C6 0.010(4) 0.013(5) 0.020(4) -0.002(3) 0.003(3) -0.003(3) 
C4 0.012(3) 0.011(4) 0.032(4) -0.010(3) 0.005(3) -0.001(3) 
Pt2 0.00970(13) 0.01104(17) 0.01238(14) -0.00015(11) 0.00392(11) 0.00048(11) 
Sn2 0.0110(2) 0.0115(3) 0.0132(2) -0.0004(2) 0.0039(2) -0.0007(2) 
V2 0.0111(6) 0.0141(8) 0.0220(7) -0.0033(5) 0.0073(5) -0.0004(5) 
C74 0.013(4) 0.029(5) 0.029(4) -0.004(4) 0.014(4) 0.001(3) 
C87 0.022(4) 0.034(6) 0.013(4) -0.001(3) 0.009(3) -0.002(4) 
C62 0.012(4) 0.031(5) 0.021(4) -0.005(4) 0.007(3) -0.010(3) 
C71 0.013(4) 0.016(5) 0.011(3) -0.002(3) 0.002(3) -0.003(3) 
C61 0.006(3) 0.022(5) 0.015(4) -0.007(3) 0.001(3) -0.002(3) 
C63 0.019(4) 0.033(6) 0.020(4) -0.013(4) 0.009(4) -0.008(4) 
C88 0.018(4) 0.025(5) 0.022(4) 0.007(4) 0.005(3) -0.006(4) 
C66 0.015(3) 0.007(4) 0.026(4) -0.002(3) 0.009(3) -0.003(3) 
C76 0.014(4) 0.019(5) 0.026(4) 0.005(3) 0.006(3) -0.001(3) 
C72 0.008(4) 0.012(5) 0.029(4) 0.007(3) 0.007(3) 0.002(3) 
C85 0.017(4) 0.020(5) 0.025(4) -0.004(3) 0.010(3) -0.005(3) 
C75 0.010(4) 0.014(5) 0.030(4) 0.000(3) 0.006(3) 0.000(3) 
C73 0.017(4) 0.016(5) 0.019(4) -0.006(3) 0.007(3) -0.005(3) 
C86 0.022(4) 0.033(6) 0.015(4) 0.003(4) -0.001(3) 0.004(4) 
C64 0.021(4) 0.025(6) 0.039(5) -0.022(4) 0.017(4) -0.008(4) 
P2 0.0120(9) 0.0124(12) 0.0158(9) 0.0004(8) 0.0053(8) 0.0002(8) 
P1 0.0125(9) 0.0140(12) 0.0143(9) 0.0003(8) 0.0051(8) 0.0024(8) 
P3 0.0139(10) 0.0109(12) 0.0204(10) 0.0001(8) 0.0061(8) 0.0018(8) 
P4 0.0113(9) 0.0180(12) 0.0138(9) -0.0020(8) 0.0040(8) -0.0014(8) 
C105 0.014(4) 0.024(5) 0.018(4) -0.002(3) 0.010(3) -0.003(3) 
C51 0.014(4) 0.024(5) 0.021(4) -0.008(3) 0.005(3) -0.008(3) 
C81 0.011(4) 0.025(5) 0.024(4) 0.004(3) 0.009(3) 0.000(3) 
C13 0.010(4) 0.028(5) 0.025(4) -0.005(4) -0.001(3) 0.006(3) 
C12 0.013(4) 0.020(5) 0.017(4) -0.003(3) 0.003(3) -0.001(3) 
C43 0.017(4) 0.012(4) 0.026(4) -0.003(3) 0.017(3) 0.002(3) 
C82 0.013(4) 0.024(5) 0.025(4) -0.010(4) 0.005(3) -0.007(3) 
C93 0.019(4) 0.015(5) 0.019(4) -0.003(3) 0.001(3) 0.004(3) 
C55 0.013(4) 0.020(5) 0.025(4) 0.012(3) 0.006(3) 0.002(3) 
C91 0.021(4) 0.022(5) 0.030(4) -0.001(4) 0.016(4) 0.006(4) 
C45 0.014(4) 0.023(5) 0.019(4) 0.000(3) 0.009(3) -0.003(3) 
C41 0.024(4) 0.011(5) 0.022(4) 0.001(3) 0.004(3) 0.004(3) 
C103 0.011(4) 0.036(6) 0.020(4) -0.010(4) 0.006(3) -0.003(3) 
C84 0.032(5) 0.015(5) 0.030(5) 0.002(4) 0.013(4) 0.001(4) 
C95 0.022(4) 0.012(5) 0.027(4) -0.007(3) 0.010(4) -0.001(3) 
C36 0.027(5) 0.027(6) 0.034(5) -0.007(4) 0.016(4) -0.009(4) 
C35 0.014(4) 0.013(5) 0.023(4) 0.000(3) 0.009(3) 0.001(3) 
C101 0.015(4) 0.007(4) 0.035(5) -0.007(3) 0.004(4) -0.003(3) 
C38 0.032(5) 0.020(5) 0.016(4) 0.001(3) 0.006(4) 0.005(4) 
C83 0.026(4) 0.019(5) 0.027(4) -0.005(4) 0.010(4) -0.007(4) 
C102 0.031(5) 0.019(5) 0.039(5) 0.011(4) 0.011(4) -0.004(4) 
C14 0.011(4) 0.026(5) 0.031(5) -0.001(4) 0.012(3) 0.001(3) 
C53 0.012(4) 0.020(5) 0.038(5) -0.003(4) 0.012(4) -0.004(3) 
C92 0.024(4) 0.018(5) 0.033(5) 0.003(4) 0.013(4) 0.000(4) 
C104 0.024(4) 0.036(6) 0.028(5) 0.010(4) 0.009(4) -0.007(4) 
C44 0.033(5) 0.023(5) 0.034(5) -0.002(4) 0.022(4) -0.005(4) 
C65 0.016(4) 0.014(5) 0.053(6) -0.001(4) 0.017(4) -0.001(3) 
C37 0.022(4) 0.021(5) 0.028(4) 0.000(4) 0.008(4) -0.006(4) 
C94 0.021(4) 0.041(6) 0.023(4) 0.012(4) 0.003(4) 0.003(4) 
C52 0.031(5) 0.052(7) 0.014(4) -0.009(4) 0.011(4) -0.003(4) 
C42 0.038(5) 0.054(7) 0.021(4) 0.015(4) 0.015(4) 0.022(5) 
C106 0.010(4) 0.031(6) 0.031(5) -0.003(4) 0.006(4) -0.004(3) 
C46 0.025(4) 0.013(5) 0.030(5) 0.003(4) 0.004(4) 0.002(4) 
C56 0.031(5) 0.037(6) 0.017(4) 0.002(4) 0.012(4) -0.010(4) 
C96 0.022(4) 0.015(5) 0.036(5) -0.007(4) 0.005(4) -0.002(4) 
C54 0.012(4) 0.029(6) 0.036(5) 0.001(4) 0.004(4) -0.001(4) 
 
_geom_special_details 
; 
 All esds (except the esd in the dihedral angle between two l.s. planes) 
 are estimated using the full covariance matrix.  The cell esds are taken 
 into account individually in the estimation of esds in distances, angles 
 and torsion angles; correlations between esds in cell parameters are only 
 used when they are defined by crystal symmetry.  An approximate (isotropic) 
 treatment of cell esds is used for estimating esds involving l.s. planes. 
; 
 
loop_ 
 _geom_bond_atom_site_label_1 
 _geom_bond_atom_site_label_2 
 _geom_bond_distance 
 _geom_bond_site_symmetry_2 
 _geom_bond_publ_flag 
Pt1 C1 2.089(7) . ? 
Pt1 P1 2.2953(19) . ? 
Pt1 P2 2.3707(19) . ? 
Pt1 Sn1 2.6558(6) . ? 
Sn1 C11 2.197(7) . ? 
Sn1 C31 2.246(7) . ? 
Sn1 C35 2.255(7) . ? 
V1 C16 2.150(7) . ? 
V1 C11 2.160(8) . ? 
V1 C12 2.163(7) . ? 
V1 C6 2.167(7) . ? 
V1 C15 2.170(7) . ? 
V1 C5 2.172(8) . ? 
V1 C2 2.183(7) . ? 
V1 C3 2.185(8) . ? 
V1 C14 2.188(7) . ? 
V1 C13 2.193(8) . ? 
V1 C4 2.199(8) . ? 
V1 C1 2.225(7) . ? 
C16 C15 1.425(10) . ? 
C16 C11 1.426(9) . ? 
C16 H16 0.9500 . ? 
C1 C2 1.419(10) . ? 
C1 C6 1.428(9) . ? 
C5 C6 1.418(11) . ? 
C5 C4 1.419(11) . ? 
C5 H5 0.9500 . ? 
C15 C14 1.406(11) . ? 
C15 H15 0.9500 . ? 
C2 C3 1.419(10) . ? 
C2 H2 0.9500 . ? 
C34 C31 1.522(11) . ? 
C34 H34A 0.9800 . ? 
C34 H34B 0.9800 . ? 
C34 H34C 0.9800 . ? 
C11 C12 1.441(11) . ? 
C31 C32 1.522(11) . ? 
C31 C33 1.530(10) . ? 
C3 C4 1.414(10) . ? 
C3 H3 0.9500 . ? 
C33 H33A 0.9800 . ? 
C33 H33B 0.9800 . ? 
C33 H33C 0.9800 . ? 
C32 H32A 0.9800 . ? 
C32 H32B 0.9800 . ? 
C32 H32C 0.9800 . ? 
C6 H6 0.9500 . ? 
C4 H4 0.9500 . ? 
Pt2 C61 2.096(7) . ? 
Pt2 P3 2.2948(19) . ? 
Pt2 P4 2.3558(19) . ? 
Pt2 Sn2 2.6648(6) . ? 
Sn2 C71 2.196(7) . ? 
Sn2 C85 2.236(8) . ? 
Sn2 C81 2.281(8) . ? 
V2 C72 2.151(8) . ? 
V2 C71 2.151(7) . ? 
V2 C62 2.162(8) . ? 
V2 C74 2.166(7) . ? 
V2 C73 2.169(7) . ? 
V2 C76 2.174(8) . ? 
V2 C63 2.174(8) . ? 
V2 C65 2.175(8) . ? 
V2 C75 2.178(7) . ? 
V2 C66 2.185(7) . ? 
V2 C64 2.193(8) . ? 
V2 C61 2.230(7) . ? 
C74 C75 1.401(10) . ? 
C74 C73 1.423(11) . ? 
C74 H74 0.9500 . ? 
C87 C85 1.533(10) . ? 
C87 H87A 0.9800 . ? 
C87 H87B 0.9800 . ? 
C87 H87C 0.9800 . ? 
C62 C61 1.410(10) . ? 
C62 C63 1.429(11) . ? 
C62 H62 0.9500 . ? 
C71 C76 1.419(11) . ? 
C71 C72 1.440(10) . ? 
C61 C66 1.436(10) . ? 
C63 C64 1.415(12) . ? 
C63 H63 0.9500 . ? 
C88 C85 1.521(11) . ? 
C88 H88A 0.9800 . ? 
C88 H88B 0.9800 . ? 
C88 H88C 0.9800 . ? 
C66 C65 1.433(10) . ? 
C66 H66 0.9500 . ? 
C76 C75 1.426(10) . ? 
C76 H76 0.9500 . ? 
C72 C73 1.415(10) . ? 
C72 H72 0.9500 . ? 
C85 C86 1.530(11) . ? 
C75 H75 0.9500 . ? 
C73 H73 0.9500 . ? 
C86 H86A 0.9800 . ? 
C86 H86B 0.9800 . ? 
C86 H86C 0.9800 . ? 
C64 C65 1.398(12) . ? 
C64 H64 0.9500 . ? 
P2 C51 1.829(7) . ? 
P2 C55 1.837(7) . ? 
P2 C53 1.840(8) . ? 
P1 C43 1.827(6) . ? 
P1 C41 1.831(8) . ? 
P1 C45 1.834(8) . ? 
P3 C93 1.830(8) . ? 
P3 C91 1.830(7) . ? 
P3 C95 1.835(8) . ? 
P4 C101 1.822(8) . ? 
P4 C103 1.829(7) . ? 
P4 C105 1.842(7) . ? 
C105 C106 1.548(10) . ? 
C105 H10A 0.9900 . ? 
C105 H10B 0.9900 . ? 
C51 C52 1.524(10) . ? 
C51 H51A 0.9900 . ? 
C51 H51B 0.9900 . ? 
C81 C83 1.527(10) . ? 
C81 C82 1.531(10) . ? 
C81 C84 1.536(11) . ? 
C13 C14 1.411(10) . ? 
C13 C12 1.431(10) . ? 
C13 H13 0.9500 . ? 
C12 H12 0.9500 . ? 
C43 C44 1.539(11) . ? 
C43 H43A 0.9900 . ? 
C43 H43B 0.9900 . ? 
C82 H82A 0.9800 . ? 
C82 H82B 0.9800 . ? 
C82 H82C 0.9800 . ? 
C93 C94 1.539(10) . ? 
C93 H93A 0.9900 . ? 
C93 H93B 0.9900 . ? 
C55 C56 1.514(11) . ? 
C55 H55A 0.9900 . ? 
C55 H55B 0.9900 . ? 
C91 C92 1.537(11) . ? 
C91 H91A 0.9900 . ? 
C91 H91B 0.9900 . ? 
C45 C46 1.533(10) . ? 
C45 H45A 0.9900 . ? 
C45 H45B 0.9900 . ? 
C41 C42 1.525(10) . ? 
C41 H41A 0.9900 . ? 
C41 H41B 0.9900 . ? 
C103 C104 1.514(11) . ? 
C103 H10C 0.9900 . ? 
C103 H10D 0.9900 . ? 
C84 H84A 0.9800 . ? 
C84 H84B 0.9800 . ? 
C84 H84C 0.9800 . ? 
C95 C96 1.533(11) . ? 
C95 H95A 0.9900 . ? 
C95 H95B 0.9900 . ? 
C36 C35 1.545(10) . ? 
C36 H36A 0.9800 . ? 
C36 H36B 0.9800 . ? 
C36 H36C 0.9800 . ? 
C35 C38 1.522(10) . ? 
C35 C37 1.544(11) . ? 
C101 C102 1.521(11) . ? 
C101 H10E 0.9900 . ? 
C101 H10F 0.9900 . ? 
C38 H38A 0.9800 . ? 
C38 H38B 0.9800 . ? 
C38 H38C 0.9800 . ? 
C83 H83A 0.9800 . ? 
C83 H83B 0.9800 . ? 
C83 H83C 0.9800 . ? 
C102 H10G 0.9800 . ? 
C102 H10H 0.9800 . ? 
C102 H10I 0.9800 . ? 
C14 H14 0.9500 . ? 
C53 C54 1.535(11) . ? 
C53 H53A 0.9900 . ? 
C53 H53B 0.9900 . ? 
C92 H92A 0.9800 . ? 
C92 H92B 0.9800 . ? 
C92 H92C 0.9800 . ? 
C104 H10J 0.9800 . ? 
C104 H10K 0.9800 . ? 
C104 H10L 0.9800 . ? 
C44 H44A 0.9800 . ? 
C44 H44B 0.9800 . ? 
C44 H44C 0.9800 . ? 
C65 H65 0.9500 . ? 
C37 H37A 0.9800 . ? 
C37 H37B 0.9800 . ? 
C37 H37C 0.9800 . ? 
C94 H94A 0.9800 . ? 
C94 H94B 0.9800 . ? 
C94 H94C 0.9800 . ? 
C52 H52A 0.9800 . ? 
C52 H52B 0.9800 . ? 
C52 H52C 0.9800 . ? 
C42 H42A 0.9800 . ? 
C42 H42B 0.9800 . ? 
C42 H42C 0.9800 . ? 
C106 H10M 0.9800 . ? 
C106 H10N 0.9800 . ? 
C106 H10O 0.9800 . ? 
C46 H46A 0.9800 . ? 
C46 H46B 0.9800 . ? 
C46 H46C 0.9800 . ? 
C56 H56A 0.9800 . ? 
C56 H56B 0.9800 . ? 
C56 H56C 0.9800 . ? 
C96 H96A 0.9800 . ? 
C96 H96B 0.9800 . ? 
C96 H96C 0.9800 . ? 
C54 H54A 0.9800 . ? 
C54 H54B 0.9800 . ? 
C54 H54C 0.9800 . ? 
 
loop_ 
 _geom_angle_atom_site_label_1 
 _geom_angle_atom_site_label_2 
 _geom_angle_atom_site_label_3 
 _geom_angle 
 _geom_angle_site_symmetry_1 
 _geom_angle_site_symmetry_3 
 _geom_angle_publ_flag 
C1 Pt1 P1 173.77(19) . . ? 
C1 Pt1 P2 82.5(2) . . ? 
P1 Pt1 P2 97.04(7) . . ? 
C1 Pt1 Sn1 82.9(2) . . ? 
P1 Pt1 Sn1 98.53(5) . . ? 
P2 Pt1 Sn1 162.09(5) . . ? 
C11 Sn1 C31 102.9(3) . . ? 
C11 Sn1 C35 98.1(3) . . ? 
C31 Sn1 C35 107.5(3) . . ? 
C11 Sn1 Pt1 108.87(19) . . ? 
C31 Sn1 Pt1 110.4(2) . . ? 
C35 Sn1 Pt1 126.22(19) . . ? 
C16 V1 C11 38.6(3) . . ? 
C16 V1 C12 68.7(3) . . ? 
C11 V1 C12 38.9(3) . . ? 
C16 V1 C6 94.0(3) . . ? 
C11 V1 C6 105.8(3) . . ? 
C12 V1 C6 139.5(3) . . ? 
C16 V1 C15 38.5(3) . . ? 
C11 V1 C15 70.2(3) . . ? 
C12 V1 C15 81.0(3) . . ? 
C6 V1 C15 108.5(3) . . ? 
C16 V1 C5 110.9(3) . . ? 
C11 V1 C5 139.5(3) . . ? 
C12 V1 C5 177.6(3) . . ? 
C6 V1 C5 38.1(3) . . ? 
C15 V1 C5 100.2(3) . . ? 
C16 V1 C2 134.6(3) . . ? 
C11 V1 C2 104.5(3) . . ? 
C12 V1 C2 97.8(3) . . ? 
C6 V1 C2 67.8(3) . . ? 
C15 V1 C2 172.9(3) . . ? 
C5 V1 C2 80.7(3) . . ? 
C16 V1 C3 172.2(3) . . ? 
C11 V1 C3 137.3(3) . . ? 
C12 V1 C3 111.7(3) . . ? 
C6 V1 C3 80.7(3) . . ? 
C15 V1 C3 148.9(3) . . ? 
C5 V1 C3 68.3(3) . . ? 
C2 V1 C3 37.9(3) . . ? 
C16 V1 C14 69.1(3) . . ? 
C11 V1 C14 83.4(3) . . ? 
C12 V1 C14 68.8(3) . . ? 
C6 V1 C14 140.5(3) . . ? 
C15 V1 C14 37.6(3) . . ? 
C5 V1 C14 113.4(3) . . ? 
C2 V1 C14 148.2(3) . . ? 
C3 V1 C14 118.6(3) . . ? 
C16 V1 C13 81.3(3) . . ? 
C11 V1 C13 70.4(3) . . ? 
C12 V1 C13 38.4(3) . . ? 
C6 V1 C13 175.3(3) . . ? 
C15 V1 C13 67.8(3) . . ? 
C5 V1 C13 144.1(3) . . ? 
C2 V1 C13 115.5(3) . . ? 
C3 V1 C13 103.9(3) . . ? 
C14 V1 C13 37.6(3) . . ? 
C16 V1 C4 145.0(3) . . ? 
C11 V1 C4 171.7(3) . . ? 
C12 V1 C4 143.2(3) . . ? 
C6 V1 C4 68.4(3) . . ? 
C15 V1 C4 116.9(3) . . ? 
C5 V1 C4 37.9(3) . . ? 
C2 V1 C4 68.1(3) . . ? 
C3 V1 C4 37.6(3) . . ? 
C14 V1 C4 104.8(3) . . ? 
C13 V1 C4 115.6(3) . . ? 
C16 V1 C1 103.8(3) . . ? 
C11 V1 C1 90.7(3) . . ? 
C12 V1 C1 108.8(3) . . ? 
C6 V1 C1 37.9(2) . . ? 
C15 V1 C1 136.2(3) . . ? 
C5 V1 C1 68.9(3) . . ? 
C2 V1 C1 37.5(3) . . ? 
C3 V1 C1 68.5(3) . . ? 
C14 V1 C1 172.9(3) . . ? 
C13 V1 C1 143.1(3) . . ? 
C4 V1 C1 81.1(3) . . ? 
C15 C16 C11 121.7(7) . . ? 
C15 C16 V1 71.5(4) . . ? 
C11 C16 V1 71.0(4) . . ? 
C15 C16 H16 119.1 . . ? 
C11 C16 H16 119.1 . . ? 
V1 C16 H16 131.3 . . ? 
C2 C1 C6 116.9(7) . . ? 
C2 C1 Pt1 124.1(5) . . ? 
C6 C1 Pt1 118.3(5) . . ? 
C2 C1 V1 69.6(4) . . ? 
C6 C1 V1 68.8(4) . . ? 
Pt1 C1 V1 140.5(4) . . ? 
C6 C5 C4 119.8(7) . . ? 
C6 C5 V1 70.8(4) . . ? 
C4 C5 V1 72.1(4) . . ? 
C6 C5 H5 120.1 . . ? 
C4 C5 H5 120.1 . . ? 
V1 C5 H5 129.4 . . ? 
C14 C15 C16 120.8(6) . . ? 
C14 C15 V1 71.9(4) . . ? 
C16 C15 V1 70.0(4) . . ? 
C14 C15 H15 119.6 . . ? 
C16 C15 H15 119.6 . . ? 
V1 C15 H15 131.3 . . ? 
C3 C2 C1 122.0(6) . . ? 
C3 C2 V1 71.1(4) . . ? 
C1 C2 V1 72.8(4) . . ? 
C3 C2 H2 119.0 . . ? 
C1 C2 H2 119.0 . . ? 
V1 C2 H2 129.7 . . ? 
C31 C34 H34A 109.5 . . ? 
C31 C34 H34B 109.5 . . ? 
H34A C34 H34B 109.5 . . ? 
C31 C34 H34C 109.5 . . ? 
H34A C34 H34C 109.5 . . ? 
H34B C34 H34C 109.5 . . ? 
C16 C11 C12 116.3(7) . . ? 
C16 C11 V1 70.3(4) . . ? 
C12 C11 V1 70.7(4) . . ? 
C16 C11 Sn1 119.3(5) . . ? 
C12 C11 Sn1 122.7(5) . . ? 
V1 C11 Sn1 116.3(3) . . ? 
C34 C31 C32 110.2(6) . . ? 
C34 C31 C33 107.4(6) . . ? 
C32 C31 C33 108.6(7) . . ? 
C34 C31 Sn1 108.4(5) . . ? 
C32 C31 Sn1 110.1(5) . . ? 
C33 C31 Sn1 112.0(5) . . ? 
C4 C3 C2 120.0(7) . . ? 
C4 C3 V1 71.7(4) . . ? 
C2 C3 V1 71.0(4) . . ? 
C4 C3 H3 120.0 . . ? 
C2 C3 H3 120.0 . . ? 
V1 C3 H3 129.7 . . ? 
C31 C33 H33A 109.5 . . ? 
C31 C33 H33B 109.5 . . ? 
H33A C33 H33B 109.5 . . ? 
C31 C33 H33C 109.5 . . ? 
H33A C33 H33C 109.5 . . ? 
H33B C33 H33C 109.5 . . ? 
C31 C32 H32A 109.5 . . ? 
C31 C32 H32B 109.5 . . ? 
H32A C32 H32B 109.5 . . ? 
C31 C32 H32C 109.5 . . ? 
H32A C32 H32C 109.5 . . ? 
H32B C32 H32C 109.5 . . ? 
C5 C6 C1 121.8(7) . . ? 
C5 C6 V1 71.1(4) . . ? 
C1 C6 V1 73.2(4) . . ? 
C5 C6 H6 119.1 . . ? 
C1 C6 H6 119.1 . . ? 
V1 C6 H6 129.0 . . ? 
C3 C4 C5 119.4(7) . . ? 
C3 C4 V1 70.6(4) . . ? 
C5 C4 V1 70.0(5) . . ? 
C3 C4 H4 120.3 . . ? 
C5 C4 H4 120.3 . . ? 
V1 C4 H4 131.9 . . ? 
C61 Pt2 P3 170.9(2) . . ? 
C61 Pt2 P4 82.1(2) . . ? 
P3 Pt2 P4 97.49(7) . . ? 
C61 Pt2 Sn2 83.49(19) . . ? 
P3 Pt2 Sn2 97.85(5) . . ? 
P4 Pt2 Sn2 163.92(5) . . ? 
C71 Sn2 C85 103.9(3) . . ? 
C71 Sn2 C81 96.9(3) . . ? 
C85 Sn2 C81 105.9(3) . . ? 
C71 Sn2 Pt2 108.76(19) . . ? 
C85 Sn2 Pt2 108.55(19) . . ? 
C81 Sn2 Pt2 129.82(19) . . ? 
C72 V2 C71 39.1(3) . . ? 
C72 V2 C62 95.3(3) . . ? 
C71 V2 C62 108.7(3) . . ? 
C72 V2 C74 69.5(3) . . ? 
C71 V2 C74 83.9(3) . . ? 
C62 V2 C74 138.6(3) . . ? 
C72 V2 C73 38.2(3) . . ? 
C71 V2 C73 70.5(3) . . ? 
C62 V2 C73 107.5(3) . . ? 
C74 V2 C73 38.3(3) . . ? 
C72 V2 C76 68.5(3) . . ? 
C71 V2 C76 38.3(3) . . ? 
C62 V2 C76 142.3(3) . . ? 
C74 V2 C76 69.1(3) . . ? 
C73 V2 C76 81.1(3) . . ? 
C72 V2 C63 113.4(3) . . ? 
C71 V2 C63 143.4(3) . . ? 
C62 V2 C63 38.5(3) . . ? 
C74 V2 C63 111.3(3) . . ? 
C73 V2 C63 100.4(3) . . ? 
C76 V2 C63 178.0(3) . . ? 
C72 V2 C65 171.4(3) . . ? 
C71 V2 C65 135.0(3) . . ? 
C62 V2 C65 80.9(3) . . ? 
C74 V2 C65 118.3(3) . . ? 
C73 V2 C65 150.3(3) . . ? 
C76 V2 C65 110.0(3) . . ? 
C63 V2 C65 68.1(3) . . ? 
C72 V2 C75 81.0(3) . . ? 
C71 V2 C75 69.9(3) . . ? 
C62 V2 C75 175.5(3) . . ? 
C74 V2 C75 37.6(3) . . ? 
C73 V2 C75 68.0(3) . . ? 
C76 V2 C75 38.3(3) . . ? 
C63 V2 C75 141.1(3) . . ? 
C65 V2 C75 103.1(3) . . ? 
C72 V2 C66 133.1(3) . . ? 
C71 V2 C66 103.1(3) . . ? 
C62 V2 C66 68.0(3) . . ? 
C74 V2 C66 149.3(3) . . ? 
C73 V2 C66 171.0(3) . . ? 
C76 V2 C66 97.7(3) . . ? 
C63 V2 C66 81.0(3) . . ? 
C65 V2 C66 38.4(3) . . ? 
C75 V2 C66 116.4(3) . . ? 
C72 V2 C64 147.7(3) . . ? 
C71 V2 C64 171.4(3) . . ? 
C62 V2 C64 68.6(3) . . ? 
C74 V2 C64 103.5(3) . . ? 
C73 V2 C64 118.1(3) . . ? 
C76 V2 C64 140.3(3) . . ? 
C63 V2 C64 37.8(3) . . ? 
C65 V2 C64 37.3(3) . . ? 
C75 V2 C64 113.3(3) . . ? 
C66 V2 C64 68.3(3) . . ? 
C72 V2 C61 103.5(3) . . ? 
C71 V2 C61 92.1(3) . . ? 
C62 V2 C61 37.4(3) . . ? 
C74 V2 C61 172.5(3) . . ? 
C73 V2 C61 134.3(3) . . ? 
C76 V2 C61 111.2(3) . . ? 
C63 V2 C61 68.7(3) . . ? 
C65 V2 C61 68.9(3) . . ? 
C75 V2 C61 145.9(3) . . ? 
C66 V2 C61 37.9(3) . . ? 
C64 V2 C61 81.0(3) . . ? 
C75 C74 C73 118.8(7) . . ? 
C75 C74 V2 71.6(4) . . ? 
C73 C74 V2 70.9(4) . . ? 
C75 C74 H74 120.6 . . ? 
C73 C74 H74 120.6 . . ? 
V2 C74 H74 129.1 . . ? 
C85 C87 H87A 109.5 . . ? 
C85 C87 H87B 109.5 . . ? 
H87A C87 H87B 109.5 . . ? 
C85 C87 H87C 109.5 . . ? 
H87A C87 H87C 109.5 . . ? 
H87B C87 H87C 109.5 . . ? 
C61 C62 C63 122.1(8) . . ? 
C61 C62 V2 73.9(4) . . ? 
C63 C62 V2 71.2(5) . . ? 
C61 C62 H62 119.0 . . ? 
C63 C62 H62 119.0 . . ? 
V2 C62 H62 128.2 . . ? 
C76 C71 C72 116.8(6) . . ? 
C76 C71 V2 71.7(4) . . ? 
C72 C71 V2 70.4(4) . . ? 
C76 C71 Sn2 124.7(5) . . ? 
C72 C71 Sn2 116.8(5) . . ? 
V2 C71 Sn2 115.8(3) . . ? 
C62 C61 C66 117.3(7) . . ? 
C62 C61 Pt2 118.3(6) . . ? 
C66 C61 Pt2 124.1(5) . . ? 
C62 C61 V2 68.7(4) . . ? 
C66 C61 V2 69.3(4) . . ? 
Pt2 C61 V2 138.4(4) . . ? 
C64 C63 C62 119.4(7) . . ? 
C64 C63 V2 71.8(5) . . ? 
C62 C63 V2 70.3(4) . . ? 
C64 C63 H63 120.3 . . ? 
C62 C63 H63 120.3 . . ? 
V2 C63 H63 130.0 . . ? 
C85 C88 H88A 109.5 . . ? 
C85 C88 H88B 109.5 . . ? 
H88A C88 H88B 109.5 . . ? 
C85 C88 H88C 109.5 . . ? 
H88A C88 H88C 109.5 . . ? 
H88B C88 H88C 109.5 . . ? 
C65 C66 C61 120.6(7) . . ? 
C65 C66 V2 70.4(4) . . ? 
C61 C66 V2 72.7(4) . . ? 
C65 C66 H66 119.7 . . ? 
C61 C66 H66 119.7 . . ? 
V2 C66 H66 129.6 . . ? 
C71 C76 C75 121.3(7) . . ? 
C71 C76 V2 70.0(4) . . ? 
C75 C76 V2 71.0(4) . . ? 
C71 C76 H76 119.4 . . ? 
C75 C76 H76 119.4 . . ? 
V2 C76 H76 132.9 . . ? 
C73 C72 C71 121.6(7) . . ? 
C73 C72 V2 71.6(4) . . ? 
C71 C72 V2 70.5(4) . . ? 
C73 C72 H72 119.2 . . ? 
C71 C72 H72 119.2 . . ? 
V2 C72 H72 131.8 . . ? 
C88 C85 C86 109.6(7) . . ? 
C88 C85 C87 108.4(6) . . ? 
C86 C85 C87 108.9(6) . . ? 
C88 C85 Sn2 108.9(5) . . ? 
C86 C85 Sn2 110.9(5) . . ? 
C87 C85 Sn2 110.1(5) . . ? 
C74 C75 C76 121.0(7) . . ? 
C74 C75 V2 70.7(4) . . ? 
C76 C75 V2 70.7(4) . . ? 
C74 C75 H75 119.5 . . ? 
C76 C75 H75 119.5 . . ? 
V2 C75 H75 132.1 . . ? 
C72 C73 C74 120.2(7) . . ? 
C72 C73 V2 70.2(4) . . ? 
C74 C73 V2 70.7(4) . . ? 
C72 C73 H73 119.9 . . ? 
C74 C73 H73 119.9 . . ? 
V2 C73 H73 132.2 . . ? 
C85 C86 H86A 109.5 . . ? 
C85 C86 H86B 109.5 . . ? 
H86A C86 H86B 109.5 . . ? 
C85 C86 H86C 109.5 . . ? 
H86A C86 H86C 109.5 . . ? 
H86B C86 H86C 109.5 . . ? 
C65 C64 C63 119.9(7) . . ? 
C65 C64 V2 70.7(5) . . ? 
C63 C64 V2 70.4(5) . . ? 
C65 C64 H64 120.0 . . ? 
C63 C64 H64 120.0 . . ? 
V2 C64 H64 131.8 . . ? 
C51 P2 C55 102.0(4) . . ? 
C51 P2 C53 100.0(4) . . ? 
C55 P2 C53 102.4(4) . . ? 
C51 P2 Pt1 116.7(2) . . ? 
C55 P2 Pt1 107.8(3) . . ? 
C53 P2 Pt1 124.9(3) . . ? 
C43 P1 C41 103.7(3) . . ? 
C43 P1 C45 101.5(3) . . ? 
C41 P1 C45 102.4(4) . . ? 
C43 P1 Pt1 118.2(3) . . ? 
C41 P1 Pt1 110.2(3) . . ? 
C45 P1 Pt1 118.8(2) . . ? 
C93 P3 C91 102.7(4) . . ? 
C93 P3 C95 103.4(4) . . ? 
C91 P3 C95 101.5(4) . . ? 
C93 P3 Pt2 108.6(2) . . ? 
C91 P3 Pt2 120.8(3) . . ? 
C95 P3 Pt2 117.6(2) . . ? 
C101 P4 C103 102.1(4) . . ? 
C101 P4 C105 102.2(4) . . ? 
C103 P4 C105 103.0(3) . . ? 
C101 P4 Pt2 112.0(3) . . ? 
C103 P4 Pt2 113.6(3) . . ? 
C105 P4 Pt2 121.6(3) . . ? 
C106 C105 P4 117.0(5) . . ? 
C106 C105 H10A 108.1 . . ? 
P4 C105 H10A 108.1 . . ? 
C106 C105 H10B 108.1 . . ? 
P4 C105 H10B 108.1 . . ? 
H10A C105 H10B 107.3 . . ? 
C52 C51 P2 113.3(6) . . ? 
C52 C51 H51A 108.9 . . ? 
P2 C51 H51A 108.9 . . ? 
C52 C51 H51B 108.9 . . ? 
P2 C51 H51B 108.9 . . ? 
H51A C51 H51B 107.7 . . ? 
C83 C81 C82 106.9(6) . . ? 
C83 C81 C84 108.8(7) . . ? 
C82 C81 C84 108.6(6) . . ? 
C83 C81 Sn2 115.0(5) . . ? 
C82 C81 Sn2 106.8(5) . . ? 
C84 C81 Sn2 110.5(5) . . ? 
C14 C13 C12 119.8(7) . . ? 
C14 C13 V1 71.0(4) . . ? 
C12 C13 V1 69.7(4) . . ? 
C14 C13 H13 120.1 . . ? 
C12 C13 H13 120.1 . . ? 
V1 C13 H13 132.1 . . ? 
C13 C12 C11 121.9(7) . . ? 
C13 C12 V1 71.9(4) . . ? 
C11 C12 V1 70.4(4) . . ? 
C13 C12 H12 119.1 . . ? 
C11 C12 H12 119.1 . . ? 
V1 C12 H12 131.6 . . ? 
C44 C43 P1 115.2(5) . . ? 
C44 C43 H43A 108.5 . . ? 
P1 C43 H43A 108.5 . . ? 
C44 C43 H43B 108.5 . . ? 
P1 C43 H43B 108.5 . . ? 
H43A C43 H43B 107.5 . . ? 
C81 C82 H82A 109.5 . . ? 
C81 C82 H82B 109.5 . . ? 
H82A C82 H82B 109.5 . . ? 
C81 C82 H82C 109.5 . . ? 
H82A C82 H82C 109.5 . . ? 
H82B C82 H82C 109.5 . . ? 
C94 C93 P3 111.6(5) . . ? 
C94 C93 H93A 109.3 . . ? 
P3 C93 H93A 109.3 . . ? 
C94 C93 H93B 109.3 . . ? 
P3 C93 H93B 109.3 . . ? 
H93A C93 H93B 108.0 . . ? 
C56 C55 P2 114.5(6) . . ? 
C56 C55 H55A 108.6 . . ? 
P2 C55 H55A 108.6 . . ? 
C56 C55 H55B 108.6 . . ? 
P2 C55 H55B 108.6 . . ? 
H55A C55 H55B 107.6 . . ? 
C92 C91 P3 113.4(5) . . ? 
C92 C91 H91A 108.9 . . ? 
P3 C91 H91A 108.9 . . ? 
C92 C91 H91B 108.9 . . ? 
P3 C91 H91B 108.9 . . ? 
H91A C91 H91B 107.7 . . ? 
C46 C45 P1 116.8(5) . . ? 
C46 C45 H45A 108.1 . . ? 
P1 C45 H45A 108.1 . . ? 
C46 C45 H45B 108.1 . . ? 
P1 C45 H45B 108.1 . . ? 
H45A C45 H45B 107.3 . . ? 
C42 C41 P1 114.6(6) . . ? 
C42 C41 H41A 108.6 . . ? 
P1 C41 H41A 108.6 . . ? 
C42 C41 H41B 108.6 . . ? 
P1 C41 H41B 108.6 . . ? 
H41A C41 H41B 107.6 . . ? 
C104 C103 P4 114.1(6) . . ? 
C104 C103 H10C 108.7 . . ? 
P4 C103 H10C 108.7 . . ? 
C104 C103 H10D 108.7 . . ? 
P4 C103 H10D 108.7 . . ? 
H10C C103 H10D 107.6 . . ? 
C81 C84 H84A 109.5 . . ? 
C81 C84 H84B 109.5 . . ? 
H84A C84 H84B 109.5 . . ? 
C81 C84 H84C 109.5 . . ? 
H84A C84 H84C 109.5 . . ? 
H84B C84 H84C 109.5 . . ? 
C96 C95 P3 117.8(6) . . ? 
C96 C95 H95A 107.8 . . ? 
P3 C95 H95A 107.8 . . ? 
C96 C95 H95B 107.8 . . ? 
P3 C95 H95B 107.8 . . ? 
H95A C95 H95B 107.2 . . ? 
C35 C36 H36A 109.5 . . ? 
C35 C36 H36B 109.5 . . ? 
H36A C36 H36B 109.5 . . ? 
C35 C36 H36C 109.5 . . ? 
H36A C36 H36C 109.5 . . ? 
H36B C36 H36C 109.5 . . ? 
C38 C35 C37 109.3(6) . . ? 
C38 C35 C36 109.2(6) . . ? 
C37 C35 C36 104.6(6) . . ? 
C38 C35 Sn1 110.6(5) . . ? 
C37 C35 Sn1 114.2(5) . . ? 
C36 C35 Sn1 108.6(5) . . ? 
C102 C101 P4 112.9(6) . . ? 
C102 C101 H10E 109.0 . . ? 
P4 C101 H10E 109.0 . . ? 
C102 C101 H10F 109.0 . . ? 
P4 C101 H10F 109.0 . . ? 
H10E C101 H10F 107.8 . . ? 
C35 C38 H38A 109.5 . . ? 
C35 C38 H38B 109.5 . . ? 
H38A C38 H38B 109.5 . . ? 
C35 C38 H38C 109.5 . . ? 
H38A C38 H38C 109.5 . . ? 
H38B C38 H38C 109.5 . . ? 
C81 C83 H83A 109.5 . . ? 
C81 C83 H83B 109.5 . . ? 
H83A C83 H83B 109.5 . . ? 
C81 C83 H83C 109.5 . . ? 
H83A C83 H83C 109.5 . . ? 
H83B C83 H83C 109.5 . . ? 
C101 C102 H10G 109.5 . . ? 
C101 C102 H10H 109.5 . . ? 
H10G C102 H10H 109.5 . . ? 
C101 C102 H10I 109.5 . . ? 
H10G C102 H10I 109.5 . . ? 
H10H C102 H10I 109.5 . . ? 
C15 C14 C13 119.5(7) . . ? 
C15 C14 V1 70.5(4) . . ? 
C13 C14 V1 71.4(4) . . ? 
C15 C14 H14 120.3 . . ? 
C13 C14 H14 120.3 . . ? 
V1 C14 H14 130.4 . . ? 
C54 C53 P2 117.9(6) . . ? 
C54 C53 H53A 107.8 . . ? 
P2 C53 H53A 107.8 . . ? 
C54 C53 H53B 107.8 . . ? 
P2 C53 H53B 107.8 . . ? 
H53A C53 H53B 107.2 . . ? 
C91 C92 H92A 109.5 . . ? 
C91 C92 H92B 109.5 . . ? 
H92A C92 H92B 109.5 . . ? 
C91 C92 H92C 109.5 . . ? 
H92A C92 H92C 109.5 . . ? 
H92B C92 H92C 109.5 . . ? 
C103 C104 H10J 109.5 . . ? 
C103 C104 H10K 109.5 . . ? 
H10J C104 H10K 109.5 . . ? 
C103 C104 H10L 109.5 . . ? 
H10J C104 H10L 109.5 . . ? 
H10K C104 H10L 109.5 . . ? 
C43 C44 H44A 109.5 . . ? 
C43 C44 H44B 109.5 . . ? 
H44A C44 H44B 109.5 . . ? 
C43 C44 H44C 109.5 . . ? 
H44A C44 H44C 109.5 . . ? 
H44B C44 H44C 109.5 . . ? 
C64 C65 C66 120.5(8) . . ? 
C64 C65 V2 72.0(5) . . ? 
C66 C65 V2 71.2(4) . . ? 
C64 C65 H65 119.8 . . ? 
C66 C65 H65 119.8 . . ? 
V2 C65 H65 129.5 . . ? 
C35 C37 H37A 109.5 . . ? 
C35 C37 H37B 109.5 . . ? 
H37A C37 H37B 109.5 . . ? 
C35 C37 H37C 109.5 . . ? 
H37A C37 H37C 109.5 . . ? 
H37B C37 H37C 109.5 . . ? 
C93 C94 H94A 109.5 . . ? 
C93 C94 H94B 109.5 . . ? 
H94A C94 H94B 109.5 . . ? 
C93 C94 H94C 109.5 . . ? 
H94A C94 H94C 109.5 . . ? 
H94B C94 H94C 109.5 . . ? 
C51 C52 H52A 109.5 . . ? 
C51 C52 H52B 109.5 . . ? 
H52A C52 H52B 109.5 . . ? 
C51 C52 H52C 109.5 . . ? 
H52A C52 H52C 109.5 . . ? 
H52B C52 H52C 109.5 . . ? 
C41 C42 H42A 109.5 . . ? 
C41 C42 H42B 109.5 . . ? 
H42A C42 H42B 109.5 . . ? 
C41 C42 H42C 109.5 . . ? 
H42A C42 H42C 109.5 . . ? 
H42B C42 H42C 109.5 . . ? 
C105 C106 H10M 109.5 . . ? 
C105 C106 H10N 109.5 . . ? 
H10M C106 H10N 109.5 . . ? 
C105 C106 H10O 109.5 . . ? 
H10M C106 H10O 109.5 . . ? 
H10N C106 H10O 109.5 . . ? 
C45 C46 H46A 109.5 . . ? 
C45 C46 H46B 109.5 . . ? 
H46A C46 H46B 109.5 . . ? 
C45 C46 H46C 109.5 . . ? 
H46A C46 H46C 109.5 . . ? 
H46B C46 H46C 109.5 . . ? 
C55 C56 H56A 109.5 . . ? 
C55 C56 H56B 109.5 . . ? 
H56A C56 H56B 109.5 . . ? 
C55 C56 H56C 109.5 . . ? 
H56A C56 H56C 109.5 . . ? 
H56B C56 H56C 109.5 . . ? 
C95 C96 H96A 109.5 . . ? 
C95 C96 H96B 109.5 . . ? 
H96A C96 H96B 109.5 . . ? 
C95 C96 H96C 109.5 . . ? 
H96A C96 H96C 109.5 . . ? 
H96B C96 H96C 109.5 . . ? 
C53 C54 H54A 109.5 . . ? 
C53 C54 H54B 109.5 . . ? 
H54A C54 H54B 109.5 . . ? 
C53 C54 H54C 109.5 . . ? 
H54A C54 H54C 109.5 . . ? 
H54B C54 H54C 109.5 . . ? 
 
loop_ 
 _geom_torsion_atom_site_label_1 
 _geom_torsion_atom_site_label_2 
 _geom_torsion_atom_site_label_3 
 _geom_torsion_atom_site_label_4 
 _geom_torsion 
 _geom_torsion_site_symmetry_1 
 _geom_torsion_site_symmetry_2 
 _geom_torsion_site_symmetry_3 
 _geom_torsion_site_symmetry_4 
 _geom_torsion_publ_flag 
C1 Pt1 Sn1 C11 -7.0(3) . . . . ? 
P1 Pt1 Sn1 C11 166.9(2) . . . . ? 
P2 Pt1 Sn1 C11 -43.0(3) . . . . ? 
C1 Pt1 Sn1 C31 105.2(3) . . . . ? 
P1 Pt1 Sn1 C31 -80.9(2) . . . . ? 
P2 Pt1 Sn1 C31 69.2(3) . . . . ? 
C1 Pt1 Sn1 C35 -122.7(3) . . . . ? 
P1 Pt1 Sn1 C35 51.2(2) . . . . ? 
P2 Pt1 Sn1 C35 -158.8(3) . . . . ? 
C11 V1 C16 C15 -134.5(7) . . . . ? 
C12 V1 C16 C15 -102.7(5) . . . . ? 
C6 V1 C16 C15 115.0(5) . . . . ? 
C5 V1 C16 C15 79.8(5) . . . . ? 
C2 V1 C16 C15 177.5(4) . . . . ? 
C14 V1 C16 C15 -28.2(4) . . . . ? 
C13 V1 C16 C15 -65.1(5) . . . . ? 
C4 V1 C16 C15 57.9(7) . . . . ? 
C1 V1 C16 C15 152.2(4) . . . . ? 
C12 V1 C16 C11 31.8(4) . . . . ? 
C6 V1 C16 C11 -110.4(4) . . . . ? 
C15 V1 C16 C11 134.5(7) . . . . ? 
C5 V1 C16 C11 -145.6(4) . . . . ? 
C2 V1 C16 C11 -47.9(6) . . . . ? 
C14 V1 C16 C11 106.4(5) . . . . ? 
C13 V1 C16 C11 69.5(4) . . . . ? 
C4 V1 C16 C11 -167.5(5) . . . . ? 
C1 V1 C16 C11 -73.3(5) . . . . ? 
P2 Pt1 C1 C2 79.2(6) . . . . ? 
Sn1 Pt1 C1 C2 -90.3(6) . . . . ? 
P2 Pt1 C1 C6 -91.1(5) . . . . ? 
Sn1 Pt1 C1 C6 99.4(5) . . . . ? 
P2 Pt1 C1 V1 178.5(5) . . . . ? 
Sn1 Pt1 C1 V1 9.0(5) . . . . ? 
C16 V1 C1 C2 150.0(4) . . . . ? 
C11 V1 C1 C2 113.2(4) . . . . ? 
C12 V1 C1 C2 78.1(5) . . . . ? 
C6 V1 C1 C2 -131.5(6) . . . . ? 
C15 V1 C1 C2 174.8(4) . . . . ? 
C5 V1 C1 C2 -102.6(5) . . . . ? 
C3 V1 C1 C2 -28.5(4) . . . . ? 
C13 V1 C1 C2 56.1(7) . . . . ? 
C4 V1 C1 C2 -65.4(4) . . . . ? 
C16 V1 C1 C6 -78.6(5) . . . . ? 
C11 V1 C1 C6 -115.3(5) . . . . ? 
C12 V1 C1 C6 -150.5(4) . . . . ? 
C15 V1 C1 C6 -53.8(6) . . . . ? 
C5 V1 C1 C6 28.8(4) . . . . ? 
C2 V1 C1 C6 131.5(6) . . . . ? 
C3 V1 C1 C6 103.0(5) . . . . ? 
C13 V1 C1 C6 -172.5(5) . . . . ? 
C4 V1 C1 C6 66.1(5) . . . . ? 
C16 V1 C1 Pt1 30.6(6) . . . . ? 
C11 V1 C1 Pt1 -6.1(5) . . . . ? 
C12 V1 C1 Pt1 -41.3(6) . . . . ? 
C6 V1 C1 Pt1 109.2(7) . . . . ? 
C15 V1 C1 Pt1 55.4(7) . . . . ? 
C5 V1 C1 Pt1 138.0(6) . . . . ? 
C2 V1 C1 Pt1 -119.4(7) . . . . ? 
C3 V1 C1 Pt1 -147.9(6) . . . . ? 
C13 V1 C1 Pt1 -63.3(8) . . . . ? 
C4 V1 C1 Pt1 175.3(6) . . . . ? 
C16 V1 C5 C6 68.6(5) . . . . ? 
C11 V1 C5 C6 35.7(6) . . . . ? 
C15 V1 C5 C6 107.1(5) . . . . ? 
C2 V1 C5 C6 -65.7(4) . . . . ? 
C3 V1 C5 C6 -103.0(5) . . . . ? 
C14 V1 C5 C6 144.1(4) . . . . ? 
C13 V1 C5 C6 173.1(5) . . . . ? 
C4 V1 C5 C6 -131.8(6) . . . . ? 
C1 V1 C5 C6 -28.7(4) . . . . ? 
C16 V1 C5 C4 -159.6(4) . . . . ? 
C11 V1 C5 C4 167.5(4) . . . . ? 
C6 V1 C5 C4 131.8(6) . . . . ? 
C15 V1 C5 C4 -121.1(4) . . . . ? 
C2 V1 C5 C4 66.1(4) . . . . ? 
C3 V1 C5 C4 28.7(4) . . . . ? 
C14 V1 C5 C4 -84.2(5) . . . . ? 
C13 V1 C5 C4 -55.1(7) . . . . ? 
C1 V1 C5 C4 103.1(4) . . . . ? 
C11 C16 C15 C14 0.6(11) . . . . ? 
V1 C16 C15 C14 53.0(7) . . . . ? 
C11 C16 C15 V1 -52.4(6) . . . . ? 
C16 V1 C15 C14 -133.8(7) . . . . ? 
C11 V1 C15 C14 -105.5(5) . . . . ? 
C12 V1 C15 C14 -66.8(5) . . . . ? 
C6 V1 C15 C14 153.8(5) . . . . ? 
C5 V1 C15 C14 115.3(5) . . . . ? 
C3 V1 C15 C14 50.7(8) . . . . ? 
C13 V1 C15 C14 -29.3(5) . . . . ? 
C4 V1 C15 C14 79.2(5) . . . . ? 
C1 V1 C15 C14 -174.6(5) . . . . ? 
C11 V1 C15 C16 28.2(4) . . . . ? 
C12 V1 C15 C16 67.0(5) . . . . ? 
C6 V1 C15 C16 -72.4(5) . . . . ? 
C5 V1 C15 C16 -110.9(5) . . . . ? 
C3 V1 C15 C16 -175.5(5) . . . . ? 
C14 V1 C15 C16 133.8(7) . . . . ? 
C13 V1 C15 C16 104.5(5) . . . . ? 
C4 V1 C15 C16 -147.0(4) . . . . ? 
C1 V1 C15 C16 -40.9(6) . . . . ? 
C6 C1 C2 C3 2.0(10) . . . . ? 
Pt1 C1 C2 C3 -168.3(6) . . . . ? 
V1 C1 C2 C3 53.7(6) . . . . ? 
C6 C1 C2 V1 -51.6(6) . . . . ? 
Pt1 C1 C2 V1 138.0(5) . . . . ? 
C16 V1 C2 C3 -176.8(4) . . . . ? 
C11 V1 C2 C3 154.6(4) . . . . ? 
C12 V1 C2 C3 115.5(5) . . . . ? 
C6 V1 C2 C3 -103.9(5) . . . . ? 
C5 V1 C2 C3 -66.5(5) . . . . ? 
C14 V1 C2 C3 53.5(7) . . . . ? 
C13 V1 C2 C3 79.7(5) . . . . ? 
C4 V1 C2 C3 -29.2(4) . . . . ? 
C1 V1 C2 C3 -133.7(6) . . . . ? 
C16 V1 C2 C1 -43.0(6) . . . . ? 
C11 V1 C2 C1 -71.6(5) . . . . ? 
C12 V1 C2 C1 -110.8(5) . . . . ? 
C6 V1 C2 C1 29.8(4) . . . . ? 
C5 V1 C2 C1 67.3(4) . . . . ? 
C3 V1 C2 C1 133.7(6) . . . . ? 
C14 V1 C2 C1 -172.7(5) . . . . ? 
C13 V1 C2 C1 -146.5(4) . . . . ? 
C4 V1 C2 C1 104.5(5) . . . . ? 
C15 C16 C11 C12 -2.7(10) . . . . ? 
V1 C16 C11 C12 -55.3(6) . . . . ? 
C15 C16 C11 V1 52.6(6) . . . . ? 
C15 C16 C11 Sn1 162.4(6) . . . . ? 
V1 C16 C11 Sn1 109.8(5) . . . . ? 
C12 V1 C11 C16 -128.6(6) . . . . ? 
C6 V1 C11 C16 76.3(5) . . . . ? 
C15 V1 C11 C16 -28.1(4) . . . . ? 
C5 V1 C11 C16 54.3(6) . . . . ? 
C2 V1 C11 C16 146.9(4) . . . . ? 
C3 V1 C11 C16 169.7(4) . . . . ? 
C14 V1 C11 C16 -64.5(4) . . . . ? 
C13 V1 C11 C16 -100.8(5) . . . . ? 
C1 V1 C11 C16 111.6(4) . . . . ? 
C16 V1 C11 C12 128.6(6) . . . . ? 
C6 V1 C11 C12 -155.1(4) . . . . ? 
C15 V1 C11 C12 100.5(4) . . . . ? 
C5 V1 C11 C12 -177.1(4) . . . . ? 
C2 V1 C11 C12 -84.5(4) . . . . ? 
C3 V1 C11 C12 -61.7(6) . . . . ? 
C14 V1 C11 C12 64.1(4) . . . . ? 
C13 V1 C11 C12 27.8(4) . . . . ? 
C1 V1 C11 C12 -119.8(4) . . . . ? 
C16 V1 C11 Sn1 -113.7(6) . . . . ? 
C12 V1 C11 Sn1 117.7(5) . . . . ? 
C6 V1 C11 Sn1 -37.4(4) . . . . ? 
C15 V1 C11 Sn1 -141.9(4) . . . . ? 
C5 V1 C11 Sn1 -59.4(5) . . . . ? 
C2 V1 C11 Sn1 33.2(4) . . . . ? 
C3 V1 C11 Sn1 56.0(6) . . . . ? 
C14 V1 C11 Sn1 -178.2(4) . . . . ? 
C13 V1 C11 Sn1 145.5(4) . . . . ? 
C1 V1 C11 Sn1 -2.2(4) . . . . ? 
C31 Sn1 C11 C16 168.3(6) . . . . ? 
C35 Sn1 C11 C16 58.2(6) . . . . ? 
Pt1 Sn1 C11 C16 -74.6(6) . . . . ? 
C31 Sn1 C11 C12 -27.6(7) . . . . ? 
C35 Sn1 C11 C12 -137.7(6) . . . . ? 
Pt1 Sn1 C11 C12 89.5(6) . . . . ? 
C31 Sn1 C11 V1 -110.6(4) . . . . ? 
C35 Sn1 C11 V1 139.3(4) . . . . ? 
Pt1 Sn1 C11 V1 6.6(4) . . . . ? 
C11 Sn1 C31 C34 73.4(5) . . . . ? 
C35 Sn1 C31 C34 176.3(5) . . . . ? 
Pt1 Sn1 C31 C34 -42.6(5) . . . . ? 
C11 Sn1 C31 C32 -47.3(6) . . . . ? 
C35 Sn1 C31 C32 55.6(6) . . . . ? 
Pt1 Sn1 C31 C32 -163.3(5) . . . . ? 
C11 Sn1 C31 C33 -168.2(5) . . . . ? 
C35 Sn1 C31 C33 -65.4(6) . . . . ? 
Pt1 Sn1 C31 C33 75.7(5) . . . . ? 
C1 C2 C3 C4 0.0(11) . . . . ? 
V1 C2 C3 C4 54.5(6) . . . . ? 
C1 C2 C3 V1 -54.4(6) . . . . ? 
C11 V1 C3 C4 -169.8(4) . . . . ? 
C12 V1 C3 C4 153.7(4) . . . . ? 
C6 V1 C3 C4 -66.5(5) . . . . ? 
C15 V1 C3 C4 44.2(8) . . . . ? 
C5 V1 C3 C4 -28.9(4) . . . . ? 
C2 V1 C3 C4 -132.1(7) . . . . ? 
C14 V1 C3 C4 76.8(5) . . . . ? 
C13 V1 C3 C4 114.1(5) . . . . ? 
C1 V1 C3 C4 -103.8(5) . . . . ? 
C11 V1 C3 C2 -37.7(6) . . . . ? 
C12 V1 C3 C2 -74.2(5) . . . . ? 
C6 V1 C3 C2 65.6(4) . . . . ? 
C15 V1 C3 C2 176.3(5) . . . . ? 
C5 V1 C3 C2 103.2(5) . . . . ? 
C14 V1 C3 C2 -151.2(4) . . . . ? 
C13 V1 C3 C2 -113.8(4) . . . . ? 
C4 V1 C3 C2 132.1(7) . . . . ? 
C1 V1 C3 C2 28.2(4) . . . . ? 
C4 C5 C6 C1 0.2(11) . . . . ? 
V1 C5 C6 C1 55.1(6) . . . . ? 
C4 C5 C6 V1 -54.9(6) . . . . ? 
C2 C1 C6 C5 -2.2(10) . . . . ? 
Pt1 C1 C6 C5 168.8(6) . . . . ? 
V1 C1 C6 C5 -54.2(6) . . . . ? 
C2 C1 C6 V1 52.0(6) . . . . ? 
Pt1 C1 C6 V1 -137.0(5) . . . . ? 
C16 V1 C6 C5 -119.3(4) . . . . ? 
C11 V1 C6 C5 -156.8(4) . . . . ? 
C12 V1 C6 C5 179.2(5) . . . . ? 
C15 V1 C6 C5 -82.8(5) . . . . ? 
C2 V1 C6 C5 103.7(5) . . . . ? 
C3 V1 C6 C5 66.5(5) . . . . ? 
C14 V1 C6 C5 -57.8(6) . . . . ? 
C4 V1 C6 C5 29.5(4) . . . . ? 
C1 V1 C6 C5 133.3(7) . . . . ? 
C16 V1 C6 C1 107.4(4) . . . . ? 
C11 V1 C6 C1 70.0(5) . . . . ? 
C12 V1 C6 C1 45.9(6) . . . . ? 
C15 V1 C6 C1 143.9(4) . . . . ? 
C5 V1 C6 C1 -133.3(7) . . . . ? 
C2 V1 C6 C1 -29.6(4) . . . . ? 
C3 V1 C6 C1 -66.7(4) . . . . ? 
C14 V1 C6 C1 168.9(5) . . . . ? 
C4 V1 C6 C1 -103.8(5) . . . . ? 
C2 C3 C4 C5 -2.0(11) . . . . ? 
V1 C3 C4 C5 52.1(6) . . . . ? 
C2 C3 C4 V1 -54.1(6) . . . . ? 
C6 C5 C4 C3 1.9(11) . . . . ? 
V1 C5 C4 C3 -52.4(6) . . . . ? 
C6 C5 C4 V1 54.3(6) . . . . ? 
C16 V1 C4 C3 167.5(5) . . . . ? 
C12 V1 C4 C3 -43.5(6) . . . . ? 
C6 V1 C4 C3 103.3(5) . . . . ? 
C15 V1 C4 C3 -156.2(4) . . . . ? 
C5 V1 C4 C3 133.0(6) . . . . ? 
C2 V1 C4 C3 29.4(4) . . . . ? 
C14 V1 C4 C3 -117.8(5) . . . . ? 
C13 V1 C4 C3 -79.3(5) . . . . ? 
C1 V1 C4 C3 66.1(4) . . . . ? 
C16 V1 C4 C5 34.6(7) . . . . ? 
C12 V1 C4 C5 -176.5(5) . . . . ? 
C6 V1 C4 C5 -29.7(4) . . . . ? 
C15 V1 C4 C5 70.8(5) . . . . ? 
C2 V1 C4 C5 -103.5(5) . . . . ? 
C3 V1 C4 C5 -133.0(6) . . . . ? 
C14 V1 C4 C5 109.2(4) . . . . ? 
C13 V1 C4 C5 147.7(4) . . . . ? 
C1 V1 C4 C5 -66.9(4) . . . . ? 
C61 Pt2 Sn2 C71 10.1(3) . . . . ? 
P3 Pt2 Sn2 C71 -160.9(2) . . . . ? 
P4 Pt2 Sn2 C71 36.7(3) . . . . ? 
C61 Pt2 Sn2 C85 -102.4(3) . . . . ? 
P3 Pt2 Sn2 C85 86.6(2) . . . . ? 
P4 Pt2 Sn2 C85 -75.8(3) . . . . ? 
C61 Pt2 Sn2 C81 126.7(3) . . . . ? 
P3 Pt2 Sn2 C81 -44.3(2) . . . . ? 
P4 Pt2 Sn2 C81 153.3(3) . . . . ? 
C72 V2 C74 C75 102.2(5) . . . . ? 
C71 V2 C74 C75 64.7(5) . . . . ? 
C62 V2 C74 C75 176.2(5) . . . . ? 
C73 V2 C74 C75 130.7(7) . . . . ? 
C76 V2 C74 C75 28.2(5) . . . . ? 
C63 V2 C74 C75 -149.7(5) . . . . ? 
C65 V2 C74 C75 -73.9(6) . . . . ? 
C66 V2 C74 C75 -40.7(8) . . . . ? 
C64 V2 C74 C75 -110.8(5) . . . . ? 
C72 V2 C74 C73 -28.5(4) . . . . ? 
C71 V2 C74 C73 -66.0(5) . . . . ? 
C62 V2 C74 C73 45.5(7) . . . . ? 
C76 V2 C74 C73 -102.5(5) . . . . ? 
C63 V2 C74 C73 79.6(5) . . . . ? 
C65 V2 C74 C73 155.4(5) . . . . ? 
C75 V2 C74 C73 -130.7(7) . . . . ? 
C66 V2 C74 C73 -171.4(5) . . . . ? 
C64 V2 C74 C73 118.5(5) . . . . ? 
C72 V2 C62 C61 -105.3(5) . . . . ? 
C71 V2 C62 C61 -67.6(5) . . . . ? 
C74 V2 C62 C61 -170.0(5) . . . . ? 
C73 V2 C62 C61 -142.4(5) . . . . ? 
C76 V2 C62 C61 -44.1(7) . . . . ? 
C63 V2 C62 C61 133.0(7) . . . . ? 
C65 V2 C62 C61 67.0(5) . . . . ? 
C66 V2 C62 C61 29.3(4) . . . . ? 
C64 V2 C62 C61 103.6(5) . . . . ? 
C72 V2 C62 C63 121.7(5) . . . . ? 
C71 V2 C62 C63 159.4(5) . . . . ? 
C74 V2 C62 C63 57.0(7) . . . . ? 
C73 V2 C62 C63 84.7(5) . . . . ? 
C76 V2 C62 C63 -177.1(5) . . . . ? 
C65 V2 C62 C63 -66.0(5) . . . . ? 
C66 V2 C62 C63 -103.7(5) . . . . ? 
C64 V2 C62 C63 -29.4(5) . . . . ? 
C61 V2 C62 C63 -133.0(7) . . . . ? 
C72 V2 C71 C76 -128.5(6) . . . . ? 
C62 V2 C71 C76 156.8(4) . . . . ? 
C74 V2 C71 C76 -63.7(4) . . . . ? 
C73 V2 C71 C76 -100.7(4) . . . . ? 
C63 V2 C71 C76 178.4(5) . . . . ? 
C65 V2 C71 C76 60.9(6) . . . . ? 
C75 V2 C71 C76 -27.7(4) . . . . ? 
C66 V2 C71 C76 85.9(4) . . . . ? 
C61 V2 C71 C76 122.6(4) . . . . ? 
C62 V2 C71 C72 -74.7(4) . . . . ? 
C74 V2 C71 C72 64.8(4) . . . . ? 
C73 V2 C71 C72 27.8(4) . . . . ? 
C76 V2 C71 C72 128.5(6) . . . . ? 
C63 V2 C71 C72 -53.2(6) . . . . ? 
C65 V2 C71 C72 -170.7(4) . . . . ? 
C75 V2 C71 C72 100.8(4) . . . . ? 
C66 V2 C71 C72 -145.6(4) . . . . ? 
C61 V2 C71 C72 -108.9(4) . . . . ? 
C72 V2 C71 Sn2 111.1(5) . . . . ? 
C62 V2 C71 Sn2 36.4(4) . . . . ? 
C74 V2 C71 Sn2 175.8(4) . . . . ? 
C73 V2 C71 Sn2 138.9(4) . . . . ? 
C76 V2 C71 Sn2 -120.5(5) . . . . ? 
C63 V2 C71 Sn2 57.9(6) . . . . ? 
C65 V2 C71 Sn2 -59.6(5) . . . . ? 
C75 V2 C71 Sn2 -148.2(4) . . . . ? 
C66 V2 C71 Sn2 -34.5(4) . . . . ? 
C61 V2 C71 Sn2 2.2(4) . . . . ? 
C85 Sn2 C71 C76 22.0(7) . . . . ? 
C81 Sn2 C71 C76 130.3(6) . . . . ? 
Pt2 Sn2 C71 C76 -93.5(6) . . . . ? 
C85 Sn2 C71 C72 -173.1(5) . . . . ? 
C81 Sn2 C71 C72 -64.8(6) . . . . ? 
Pt2 Sn2 C71 C72 71.4(6) . . . . ? 
C85 Sn2 C71 V2 106.9(4) . . . . ? 
C81 Sn2 C71 V2 -144.9(3) . . . . ? 
Pt2 Sn2 C71 V2 -8.6(4) . . . . ? 
C63 C62 C61 C66 3.7(10) . . . . ? 
V2 C62 C61 C66 -51.1(6) . . . . ? 
C63 C62 C61 Pt2 -170.6(5) . . . . ? 
V2 C62 C61 Pt2 134.6(5) . . . . ? 
C63 C62 C61 V2 54.8(6) . . . . ? 
P4 Pt2 C61 C62 84.8(5) . . . . ? 
Sn2 Pt2 C61 C62 -102.4(5) . . . . ? 
P4 Pt2 C61 C66 -89.2(6) . . . . ? 
Sn2 Pt2 C61 C66 83.6(6) . . . . ? 
P4 Pt2 C61 V2 173.9(5) . . . . ? 
Sn2 Pt2 C61 V2 -13.3(5) . . . . ? 
C72 V2 C61 C62 81.0(5) . . . . ? 
C71 V2 C61 C62 118.8(5) . . . . ? 
C73 V2 C61 C62 54.4(6) . . . . ? 
C76 V2 C61 C62 152.9(5) . . . . ? 
C63 V2 C61 C62 -29.3(5) . . . . ? 
C65 V2 C61 C62 -103.1(5) . . . . ? 
C75 V2 C61 C62 174.8(5) . . . . ? 
C66 V2 C61 C62 -132.4(7) . . . . ? 
C64 V2 C61 C62 -66.4(5) . . . . ? 
C72 V2 C61 C66 -146.6(4) . . . . ? 
C71 V2 C61 C66 -108.8(4) . . . . ? 
C62 V2 C61 C66 132.4(7) . . . . ? 
C73 V2 C61 C66 -173.2(4) . . . . ? 
C76 V2 C61 C66 -74.7(5) . . . . ? 
C63 V2 C61 C66 103.1(5) . . . . ? 
C65 V2 C61 C66 29.3(4) . . . . ? 
C75 V2 C61 C66 -52.8(7) . . . . ? 
C64 V2 C61 C66 66.0(5) . . . . ? 
C72 V2 C61 Pt2 -28.1(6) . . . . ? 
C71 V2 C61 Pt2 9.7(6) . . . . ? 
C62 V2 C61 Pt2 -109.1(8) . . . . ? 
C73 V2 C61 Pt2 -54.7(7) . . . . ? 
C76 V2 C61 Pt2 43.8(6) . . . . ? 
C63 V2 C61 Pt2 -138.4(6) . . . . ? 
C65 V2 C61 Pt2 147.8(6) . . . . ? 
C75 V2 C61 Pt2 65.7(8) . . . . ? 
C66 V2 C61 Pt2 118.5(7) . . . . ? 
C64 V2 C61 Pt2 -175.5(6) . . . . ? 
C61 C62 C63 C64 -1.7(11) . . . . ? 
V2 C62 C63 C64 54.4(7) . . . . ? 
C61 C62 C63 V2 -56.0(6) . . . . ? 
C72 V2 C63 C64 160.8(4) . . . . ? 
C71 V2 C63 C64 -165.8(4) . . . . ? 
C62 V2 C63 C64 -131.8(7) . . . . ? 
C74 V2 C63 C64 84.7(5) . . . . ? 
C73 V2 C63 C64 123.0(4) . . . . ? 
C65 V2 C63 C64 -28.4(4) . . . . ? 
C75 V2 C63 C64 55.3(6) . . . . ? 
C66 V2 C63 C64 -66.0(4) . . . . ? 
C61 V2 C63 C64 -103.3(5) . . . . ? 
C72 V2 C63 C62 -67.4(5) . . . . ? 
C71 V2 C63 C62 -34.0(7) . . . . ? 
C74 V2 C63 C62 -143.5(5) . . . . ? 
C73 V2 C63 C62 -105.1(5) . . . . ? 
C65 V2 C63 C62 103.5(5) . . . . ? 
C75 V2 C63 C62 -172.9(5) . . . . ? 
C66 V2 C63 C62 65.8(5) . . . . ? 
C64 V2 C63 C62 131.8(7) . . . . ? 
C61 V2 C63 C62 28.5(4) . . . . ? 
C62 C61 C66 C65 -3.0(10) . . . . ? 
Pt2 C61 C66 C65 171.0(5) . . . . ? 
V2 C61 C66 C65 -53.7(6) . . . . ? 
C62 C61 C66 V2 50.7(6) . . . . ? 
Pt2 C61 C66 V2 -135.2(5) . . . . ? 
C72 V2 C66 C65 179.7(5) . . . . ? 
C71 V2 C66 C65 -151.2(5) . . . . ? 
C62 V2 C66 C65 103.7(5) . . . . ? 
C74 V2 C66 C65 -51.0(8) . . . . ? 
C76 V2 C66 C65 -112.6(5) . . . . ? 
C63 V2 C66 C65 65.9(5) . . . . ? 
C75 V2 C66 C65 -77.3(5) . . . . ? 
C64 V2 C66 C65 28.8(5) . . . . ? 
C61 V2 C66 C65 132.6(7) . . . . ? 
C72 V2 C66 C61 47.1(6) . . . . ? 
C71 V2 C66 C61 76.2(5) . . . . ? 
C62 V2 C66 C61 -28.9(4) . . . . ? 
C74 V2 C66 C61 176.4(5) . . . . ? 
C76 V2 C66 C61 114.9(4) . . . . ? 
C63 V2 C66 C61 -66.7(4) . . . . ? 
C65 V2 C66 C61 -132.6(7) . . . . ? 
C75 V2 C66 C61 150.1(4) . . . . ? 
C64 V2 C66 C61 -103.8(5) . . . . ? 
C72 C71 C76 C75 -4.5(11) . . . . ? 
V2 C71 C76 C75 51.2(6) . . . . ? 
Sn2 C71 C76 C75 160.4(5) . . . . ? 
C72 C71 C76 V2 -55.8(6) . . . . ? 
Sn2 C71 C76 V2 109.2(5) . . . . ? 
C72 V2 C76 C71 32.1(4) . . . . ? 
C62 V2 C76 C71 -37.6(7) . . . . ? 
C74 V2 C76 C71 107.4(5) . . . . ? 
C73 V2 C76 C71 69.6(4) . . . . ? 
C65 V2 C76 C71 -138.9(4) . . . . ? 
C75 V2 C76 C71 135.2(6) . . . . ? 
C66 V2 C76 C71 -101.3(4) . . . . ? 
C64 V2 C76 C71 -166.5(4) . . . . ? 
C61 V2 C76 C71 -64.6(5) . . . . ? 
C72 V2 C76 C75 -103.1(5) . . . . ? 
C71 V2 C76 C75 -135.2(6) . . . . ? 
C62 V2 C76 C75 -172.8(5) . . . . ? 
C74 V2 C76 C75 -27.8(4) . . . . ? 
C73 V2 C76 C75 -65.6(5) . . . . ? 
C65 V2 C76 C75 85.9(5) . . . . ? 
C66 V2 C76 C75 123.5(5) . . . . ? 
C64 V2 C76 C75 58.4(6) . . . . ? 
C61 V2 C76 C75 160.2(4) . . . . ? 
C76 C71 C72 C73 4.1(10) . . . . ? 
V2 C71 C72 C73 -52.3(6) . . . . ? 
Sn2 C71 C72 C73 -162.0(5) . . . . ? 
C76 C71 C72 V2 56.4(6) . . . . ? 
Sn2 C71 C72 V2 -109.7(4) . . . . ? 
C71 V2 C72 C73 134.8(6) . . . . ? 
C62 V2 C72 C73 -111.8(4) . . . . ? 
C74 V2 C72 C73 28.5(4) . . . . ? 
C76 V2 C72 C73 103.3(5) . . . . ? 
C63 V2 C72 C73 -76.6(5) . . . . ? 
C75 V2 C72 C73 65.7(4) . . . . ? 
C66 V2 C72 C73 -176.4(4) . . . . ? 
C64 V2 C72 C73 -54.4(7) . . . . ? 
C61 V2 C72 C73 -148.8(4) . . . . ? 
C62 V2 C72 C71 113.4(4) . . . . ? 
C74 V2 C72 C71 -106.2(5) . . . . ? 
C73 V2 C72 C71 -134.8(6) . . . . ? 
C76 V2 C72 C71 -31.4(4) . . . . ? 
C63 V2 C72 C71 148.7(4) . . . . ? 
C75 V2 C72 C71 -69.1(4) . . . . ? 
C66 V2 C72 C71 48.8(6) . . . . ? 
C64 V2 C72 C71 170.9(5) . . . . ? 
C61 V2 C72 C71 76.4(4) . . . . ? 
C71 Sn2 C85 C88 -68.0(5) . . . . ? 
C81 Sn2 C85 C88 -169.5(5) . . . . ? 
Pt2 Sn2 C85 C88 47.6(5) . . . . ? 
C71 Sn2 C85 C86 52.7(6) . . . . ? 
C81 Sn2 C85 C86 -48.8(6) . . . . ? 
Pt2 Sn2 C85 C86 168.3(5) . . . . ? 
C71 Sn2 C85 C87 173.2(5) . . . . ? 
C81 Sn2 C85 C87 71.8(5) . . . . ? 
Pt2 Sn2 C85 C87 -71.1(5) . . . . ? 
C73 C74 C75 C76 3.1(11) . . . . ? 
V2 C74 C75 C76 -51.8(6) . . . . ? 
C73 C74 C75 V2 54.9(6) . . . . ? 
C71 C76 C75 C74 1.0(11) . . . . ? 
V2 C76 C75 C74 51.8(6) . . . . ? 
C71 C76 C75 V2 -50.8(6) . . . . ? 
C72 V2 C75 C74 -67.9(5) . . . . ? 
C71 V2 C75 C74 -106.8(5) . . . . ? 
C73 V2 C75 C74 -30.5(5) . . . . ? 
C76 V2 C75 C74 -134.5(7) . . . . ? 
C63 V2 C75 C74 48.5(7) . . . . ? 
C65 V2 C75 C74 119.7(5) . . . . ? 
C66 V2 C75 C74 158.2(5) . . . . ? 
C64 V2 C75 C74 81.8(5) . . . . ? 
C61 V2 C75 C74 -168.7(5) . . . . ? 
C72 V2 C75 C76 66.6(5) . . . . ? 
C71 V2 C75 C76 27.7(4) . . . . ? 
C74 V2 C75 C76 134.5(7) . . . . ? 
C73 V2 C75 C76 104.0(5) . . . . ? 
C63 V2 C75 C76 -176.9(5) . . . . ? 
C65 V2 C75 C76 -105.7(5) . . . . ? 
C66 V2 C75 C76 -67.3(5) . . . . ? 
C64 V2 C75 C76 -143.7(5) . . . . ? 
C61 V2 C75 C76 -34.2(7) . . . . ? 
C71 C72 C73 C74 -0.2(11) . . . . ? 
V2 C72 C73 C74 -52.0(6) . . . . ? 
C71 C72 C73 V2 51.8(6) . . . . ? 
C75 C74 C73 C72 -3.5(11) . . . . ? 
V2 C74 C73 C72 51.8(6) . . . . ? 
C75 C74 C73 V2 -55.2(6) . . . . ? 
C71 V2 C73 C72 -28.4(4) . . . . ? 
C62 V2 C73 C72 75.8(5) . . . . ? 
C74 V2 C73 C72 -133.8(7) . . . . ? 
C76 V2 C73 C72 -66.4(5) . . . . ? 
C63 V2 C73 C72 114.9(5) . . . . ? 
C65 V2 C73 C72 178.5(6) . . . . ? 
C75 V2 C73 C72 -103.9(5) . . . . ? 
C64 V2 C73 C72 150.5(5) . . . . ? 
C61 V2 C73 C72 44.6(6) . . . . ? 
C72 V2 C73 C74 133.8(7) . . . . ? 
C71 V2 C73 C74 105.5(5) . . . . ? 
C62 V2 C73 C74 -150.3(5) . . . . ? 
C76 V2 C73 C74 67.4(5) . . . . ? 
C63 V2 C73 C74 -111.3(5) . . . . ? 
C65 V2 C73 C74 -47.7(8) . . . . ? 
C75 V2 C73 C74 29.9(4) . . . . ? 
C64 V2 C73 C74 -75.7(5) . . . . ? 
C61 V2 C73 C74 178.5(4) . . . . ? 
C62 C63 C64 C65 -1.3(11) . . . . ? 
V2 C63 C64 C65 52.3(7) . . . . ? 
C62 C63 C64 V2 -53.7(6) . . . . ? 
C72 V2 C64 C65 -167.8(5) . . . . ? 
C62 V2 C64 C65 -103.5(5) . . . . ? 
C74 V2 C64 C65 119.3(5) . . . . ? 
C73 V2 C64 C65 157.4(4) . . . . ? 
C76 V2 C64 C65 45.8(6) . . . . ? 
C63 V2 C64 C65 -133.4(7) . . . . ? 
C75 V2 C64 C65 80.8(5) . . . . ? 
C66 V2 C64 C65 -29.6(4) . . . . ? 
C61 V2 C64 C65 -66.8(5) . . . . ? 
C72 V2 C64 C63 -34.4(7) . . . . ? 
C62 V2 C64 C63 29.9(4) . . . . ? 
C74 V2 C64 C63 -107.4(5) . . . . ? 
C73 V2 C64 C63 -69.2(5) . . . . ? 
C76 V2 C64 C63 179.1(4) . . . . ? 
C65 V2 C64 C63 133.4(7) . . . . ? 
C75 V2 C64 C63 -145.8(4) . . . . ? 
C66 V2 C64 C63 103.8(5) . . . . ? 
C61 V2 C64 C63 66.6(4) . . . . ? 
C1 Pt1 P2 C51 38.9(3) . . . . ? 
P1 Pt1 P2 C51 -134.8(3) . . . . ? 
Sn1 Pt1 P2 C51 75.0(3) . . . . ? 
C1 Pt1 P2 C55 -75.1(3) . . . . ? 
P1 Pt1 P2 C55 111.2(3) . . . . ? 
Sn1 Pt1 P2 C55 -39.0(3) . . . . ? 
C1 Pt1 P2 C53 165.0(4) . . . . ? 
P1 Pt1 P2 C53 -8.8(3) . . . . ? 
Sn1 Pt1 P2 C53 -159.0(3) . . . . ? 
P2 Pt1 P1 C43 -52.4(3) . . . . ? 
Sn1 Pt1 P1 C43 118.8(3) . . . . ? 
P2 Pt1 P1 C41 66.5(3) . . . . ? 
Sn1 Pt1 P1 C41 -122.4(3) . . . . ? 
P2 Pt1 P1 C45 -176.0(3) . . . . ? 
Sn1 Pt1 P1 C45 -4.9(3) . . . . ? 
P4 Pt2 P3 C93 -67.6(3) . . . . ? 
Sn2 Pt2 P3 C93 117.2(3) . . . . ? 
P4 Pt2 P3 C91 50.5(3) . . . . ? 
Sn2 Pt2 P3 C91 -124.7(3) . . . . ? 
P4 Pt2 P3 C95 175.5(3) . . . . ? 
Sn2 Pt2 P3 C95 0.3(3) . . . . ? 
C61 Pt2 P4 C101 55.6(3) . . . . ? 
P3 Pt2 P4 C101 -133.6(3) . . . . ? 
Sn2 Pt2 P4 C101 28.9(3) . . . . ? 
C61 Pt2 P4 C103 -59.5(4) . . . . ? 
P3 Pt2 P4 C103 111.4(3) . . . . ? 
Sn2 Pt2 P4 C103 -86.1(3) . . . . ? 
C61 Pt2 P4 C105 176.7(4) . . . . ? 
P3 Pt2 P4 C105 -12.5(3) . . . . ? 
Sn2 Pt2 P4 C105 150.0(3) . . . . ? 
C101 P4 C105 C106 -54.3(6) . . . . ? 
C103 P4 C105 C106 51.4(7) . . . . ? 
Pt2 P4 C105 C106 -179.9(5) . . . . ? 
C55 P2 C51 C52 -171.4(5) . . . . ? 
C53 P2 C51 C52 -66.3(6) . . . . ? 
Pt1 P2 C51 C52 71.4(6) . . . . ? 
C71 Sn2 C81 C83 -145.0(5) . . . . ? 
C85 Sn2 C81 C83 -38.3(6) . . . . ? 
Pt2 Sn2 C81 C83 93.5(6) . . . . ? 
C71 Sn2 C81 C82 -26.6(5) . . . . ? 
C85 Sn2 C81 C82 80.1(5) . . . . ? 
Pt2 Sn2 C81 C82 -148.1(4) . . . . ? 
C71 Sn2 C81 C84 91.3(5) . . . . ? 
C85 Sn2 C81 C84 -162.0(5) . . . . ? 
Pt2 Sn2 C81 C84 -30.2(6) . . . . ? 
C16 V1 C13 C14 66.9(5) . . . . ? 
C11 V1 C13 C14 105.2(5) . . . . ? 
C12 V1 C13 C14 133.4(7) . . . . ? 
C15 V1 C13 C14 29.3(5) . . . . ? 
C5 V1 C13 C14 -46.9(8) . . . . ? 
C2 V1 C13 C14 -157.6(5) . . . . ? 
C3 V1 C13 C14 -119.1(5) . . . . ? 
C4 V1 C13 C14 -80.9(5) . . . . ? 
C1 V1 C13 C14 168.3(5) . . . . ? 
C16 V1 C13 C12 -66.6(5) . . . . ? 
C11 V1 C13 C12 -28.2(4) . . . . ? 
C15 V1 C13 C12 -104.1(5) . . . . ? 
C5 V1 C13 C12 179.6(5) . . . . ? 
C2 V1 C13 C12 69.0(5) . . . . ? 
C3 V1 C13 C12 107.5(5) . . . . ? 
C14 V1 C13 C12 -133.4(7) . . . . ? 
C4 V1 C13 C12 145.7(4) . . . . ? 
C1 V1 C13 C12 34.9(7) . . . . ? 
C14 C13 C12 C11 -0.5(11) . . . . ? 
V1 C13 C12 C11 51.8(6) . . . . ? 
C14 C13 C12 V1 -52.3(7) . . . . ? 
C16 C11 C12 C13 2.7(11) . . . . ? 
V1 C11 C12 C13 -52.5(7) . . . . ? 
Sn1 C11 C12 C13 -161.9(6) . . . . ? 
C16 C11 C12 V1 55.1(6) . . . . ? 
Sn1 C11 C12 V1 -109.4(5) . . . . ? 
C16 V1 C12 C13 103.3(5) . . . . ? 
C11 V1 C12 C13 134.9(6) . . . . ? 
C6 V1 C12 C13 173.4(5) . . . . ? 
C15 V1 C12 C13 65.4(5) . . . . ? 
C2 V1 C12 C13 -121.7(5) . . . . ? 
C3 V1 C12 C13 -85.1(5) . . . . ? 
C14 V1 C12 C13 28.4(5) . . . . ? 
C4 V1 C12 C13 -58.2(6) . . . . ? 
C1 V1 C12 C13 -158.8(4) . . . . ? 
C16 V1 C12 C11 -31.6(4) . . . . ? 
C6 V1 C12 C11 38.6(6) . . . . ? 
C15 V1 C12 C11 -69.5(4) . . . . ? 
C2 V1 C12 C11 103.4(4) . . . . ? 
C3 V1 C12 C11 140.0(4) . . . . ? 
C14 V1 C12 C11 -106.5(4) . . . . ? 
C13 V1 C12 C11 -134.9(6) . . . . ? 
C4 V1 C12 C11 166.9(4) . . . . ? 
C1 V1 C12 C11 66.4(4) . . . . ? 
C41 P1 C43 C44 165.3(6) . . . . ? 
C45 P1 C43 C44 59.3(6) . . . . ? 
Pt1 P1 C43 C44 -72.6(6) . . . . ? 
C91 P3 C93 C94 171.5(6) . . . . ? 
C95 P3 C93 C94 66.2(6) . . . . ? 
Pt2 P3 C93 C94 -59.4(6) . . . . ? 
C51 P2 C55 C56 -177.6(6) . . . . ? 
C53 P2 C55 C56 79.2(6) . . . . ? 
Pt1 P2 C55 C56 -54.1(6) . . . . ? 
C93 P3 C91 C92 168.2(6) . . . . ? 
C95 P3 C91 C92 -85.0(7) . . . . ? 
Pt2 P3 C91 C92 47.2(7) . . . . ? 
C43 P1 C45 C46 50.1(6) . . . . ? 
C41 P1 C45 C46 -56.9(6) . . . . ? 
Pt1 P1 C45 C46 -178.5(4) . . . . ? 
C43 P1 C41 C42 179.4(6) . . . . ? 
C45 P1 C41 C42 -75.3(7) . . . . ? 
Pt1 P1 C41 C42 52.0(7) . . . . ? 
C101 P4 C103 C104 179.4(5) . . . . ? 
C105 P4 C103 C104 73.6(6) . . . . ? 
Pt2 P4 C103 C104 -59.8(6) . . . . ? 
C93 P3 C95 C96 44.3(7) . . . . ? 
C91 P3 C95 C96 -61.9(7) . . . . ? 
Pt2 P3 C95 C96 163.9(5) . . . . ? 
C11 Sn1 C35 C38 -94.0(5) . . . . ? 
C31 Sn1 C35 C38 159.8(5) . . . . ? 
Pt1 Sn1 C35 C38 26.6(6) . . . . ? 
C11 Sn1 C35 C37 142.3(5) . . . . ? 
C31 Sn1 C35 C37 36.0(6) . . . . ? 
Pt1 Sn1 C35 C37 -97.2(5) . . . . ? 
C11 Sn1 C35 C36 25.9(5) . . . . ? 
C31 Sn1 C35 C36 -80.3(5) . . . . ? 
Pt1 Sn1 C35 C36 146.5(4) . . . . ? 
C103 P4 C101 C102 178.9(5) . . . . ? 
C105 P4 C101 C102 -74.8(6) . . . . ? 
Pt2 P4 C101 C102 56.9(6) . . . . ? 
C16 C15 C14 C13 1.7(11) . . . . ? 
V1 C15 C14 C13 53.9(6) . . . . ? 
C16 C15 C14 V1 -52.2(6) . . . . ? 
C12 C13 C14 C15 -1.7(11) . . . . ? 
V1 C13 C14 C15 -53.5(6) . . . . ? 
C12 C13 C14 V1 51.7(6) . . . . ? 
C16 V1 C14 C15 28.8(4) . . . . ? 
C11 V1 C14 C15 65.9(5) . . . . ? 
C12 V1 C14 C15 103.2(5) . . . . ? 
C6 V1 C14 C15 -41.1(7) . . . . ? 
C5 V1 C14 C15 -75.8(5) . . . . ? 
C2 V1 C14 C15 172.9(5) . . . . ? 
C3 V1 C14 C15 -152.9(5) . . . . ? 
C13 V1 C14 C15 132.1(7) . . . . ? 
C4 V1 C14 C15 -115.0(5) . . . . ? 
C16 V1 C14 C13 -103.3(5) . . . . ? 
C11 V1 C14 C13 -66.2(5) . . . . ? 
C12 V1 C14 C13 -28.9(5) . . . . ? 
C6 V1 C14 C13 -173.2(5) . . . . ? 
C15 V1 C14 C13 -132.1(7) . . . . ? 
C5 V1 C14 C13 152.1(5) . . . . ? 
C2 V1 C14 C13 40.8(8) . . . . ? 
C3 V1 C14 C13 75.0(6) . . . . ? 
C4 V1 C14 C13 112.9(5) . . . . ? 
C51 P2 C53 C54 -46.6(7) . . . . ? 
C55 P2 C53 C54 58.2(7) . . . . ? 
Pt1 P2 C53 C54 -179.4(5) . . . . ? 
C63 C64 C65 C66 2.0(11) . . . . ? 
V2 C64 C65 C66 54.3(7) . . . . ? 
C63 C64 C65 V2 -52.2(7) . . . . ? 
C61 C66 C65 C64 0.2(11) . . . . ? 
V2 C66 C65 C64 -54.6(7) . . . . ? 
C61 C66 C65 V2 54.8(6) . . . . ? 
C71 V2 C65 C64 174.0(5) . . . . ? 
C62 V2 C65 C64 66.5(5) . . . . ? 
C74 V2 C65 C64 -74.5(5) . . . . ? 
C73 V2 C65 C64 -43.1(8) . . . . ? 
C76 V2 C65 C64 -150.8(5) . . . . ? 
C63 V2 C65 C64 28.7(5) . . . . ? 
C75 V2 C65 C64 -111.5(5) . . . . ? 
C66 V2 C65 C64 132.3(7) . . . . ? 
C61 V2 C65 C64 103.3(5) . . . . ? 
C71 V2 C65 C66 41.6(6) . . . . ? 
C62 V2 C65 C66 -65.8(5) . . . . ? 
C74 V2 C65 C66 153.2(4) . . . . ? 
C73 V2 C65 C66 -175.4(5) . . . . ? 
C76 V2 C65 C66 76.8(5) . . . . ? 
C63 V2 C65 C66 -103.6(5) . . . . ? 
C75 V2 C65 C66 116.2(5) . . . . ? 
C64 V2 C65 C66 -132.3(7) . . . . ? 
C61 V2 C65 C66 -29.0(4) . . . . ? 
 
_diffrn_measured_fraction_theta_max    0.987 
_diffrn_reflns_theta_full              26.00 
_diffrn_measured_fraction_theta_full   0.990 
_refine_diff_density_max    1.065 
_refine_diff_density_min   -0.922 
_refine_diff_density_rms    0.197 


##########################################################


data_12 

# 1. Submission Details

_publ_contact_author_name   'Prof. Dr. Holger Braunschweig'
_publ_contact_author_address
; Institut fuer Anorganische Chemie
Universitaet Wuerzburg
Am Hubland
97074 Wuerzburg, Germany
;
_publ_contact_author_email         'H.Braunschweig@mail.uni-wuerzburg.de'
_publ_contact_author_fax           +49-931-3184623
_publ_contact_author_phone         +49-931-3185260

_publ_requested_journal            ?
_publ_requested_category           ?
_publ_requested_coeditor_name      ?

_publ_contact_letter
; ?
;

_publ_section_title
;?
;

_publ_section_abstract
;?
;

loop_
_publ_author_name
_publ_author_address
      'Braunschweig, Holger'
;     Institut fuer Anorganische Chemie
      Universitaet Wuerzburg
      Am Hubland
      D-97074 Wuerzburg, Germany
;
      'Dueck, Klaus'
;     Institut fuer Anorganische Chemie
      Universitaet Wuerzburg
      Am Hubland
      D-97074 Wuerzburg, Germany
;
      'Kramer, Thomas'
;     Institut fuer Anorganische Chemie
      Universitaet Wuerzburg
      Am Hubland
      D-97074 Wuerzburg, Germany
;
 
_audit_creation_method            SHELXL-97 
_chemical_name_systematic 
; 
?
; 
_chemical_name_common             
;
?
; 
_chemical_melting_point           ? 
_chemical_formula_moiety          
'C32 H58 P2 Pt Sn V'
 
_chemical_formula_sum 
 'C32 H58 P2 Pt Sn V'
_chemical_formula_weight          869.44 
 
loop_ 
 _atom_type_symbol 
 _atom_type_description 
 _atom_type_scat_dispersion_real 
 _atom_type_scat_dispersion_imag 
 _atom_type_scat_source 
 'C'  'C'   0.0033   0.0016 
 'International Tables Vol C Tables 4.2.6.8 and 6.1.1.4' 
 'H'  'H'   0.0000   0.0000 
 'International Tables Vol C Tables 4.2.6.8 and 6.1.1.4' 
 'P'  'P'   0.1023   0.0942 
 'International Tables Vol C Tables 4.2.6.8 and 6.1.1.4' 
 'V'  'V'   0.3005   0.5294 
 'International Tables Vol C Tables 4.2.6.8 and 6.1.1.4' 
 'Sn'  'Sn'  -0.6537   1.4246 
 'International Tables Vol C Tables 4.2.6.8 and 6.1.1.4' 
 'Pt'  'Pt'  -1.7033   8.3905 
 'International Tables Vol C Tables 4.2.6.8 and 6.1.1.4' 
 
_symmetry_cell_setting            'Monoclinic' 
_symmetry_space_group_name_H-M    'P2(1)/n'
_symmetry_space_group_name_Hall   '-P 2yn' 
 
loop_ 
 _symmetry_equiv_pos_as_xyz 
 'x, y, z' 
 '-x+1/2, y+1/2, -z+1/2' 
 '-x, -y, -z' 
 'x-1/2, -y-1/2, z-1/2' 
 
_cell_length_a                    11.6024(5) 
_cell_length_b                    19.1333(9) 
_cell_length_c                    15.8714(7) 
_cell_angle_alpha                 90.00 
_cell_angle_beta                  102.149(2) 
_cell_angle_gamma                 90.00 
_cell_volume                      3444.4(3) 
_cell_formula_units_Z             4 
_cell_measurement_temperature     100(2) 
_cell_measurement_reflns_used     **** 
_cell_measurement_theta_min       2.50 
_cell_measurement_theta_max       26.75 
 
_exptl_crystal_description        'plate' 
_exptl_crystal_colour             'colourless' 
_exptl_crystal_size_max           0.31 
_exptl_crystal_size_mid           0.14 
_exptl_crystal_size_min           0.07 
_exptl_crystal_density_meas       ? 
_exptl_crystal_density_diffrn     1.677 
_exptl_crystal_density_method     'not measured' 
_exptl_crystal_F_000              1724 
_exptl_absorpt_coefficient_mu     5.149 
_exptl_absorpt_correction_type    'multi-scan' 
_exptl_absorpt_correction_T_min   0.4999
_exptl_absorpt_correction_T_max   0.7454
_exptl_absorpt_process_details    'Sadabs 2008/1 (Brucker 2008)' 
 
_exptl_special_details 
; 
 The crystal was immersed in a film of perfluoropolyether oil, mounted
on a polyimide microloop (MicroMounts of MiTeGen) and transferred to
stream of cold nitrogen (Oxford Cryostream 700). 
; 
 
_diffrn_ambient_temperature       100(2) 
_diffrn_radiation_wavelength      0.71073 
_diffrn_radiation_type            MoK\a 
_diffrn_radiation_source          'rotating anode' 
_diffrn_radiation_monochromator   'multi-layer mirror' 
_diffrn_measurement_device_type   'Bruker APEX-II CCD' 
_diffrn_measurement_method        '\f and \w scans' 
_diffrn_detector_area_resol_mean  ? 
_diffrn_standards_number          ? 
_diffrn_standards_interval_count  ? 
_diffrn_standards_interval_time   ? 
_diffrn_standards_decay_%         ? 
_diffrn_reflns_number             71666 
_diffrn_reflns_av_R_equivalents   0.0643 
_diffrn_reflns_av_sigmaI/netI     0.0352 
_diffrn_reflns_limit_h_min        -13 
_diffrn_reflns_limit_h_max        14 
_diffrn_reflns_limit_k_min        -24 
_diffrn_reflns_limit_k_max        24 
_diffrn_reflns_limit_l_min        -20 
_diffrn_reflns_limit_l_max        19 
_diffrn_reflns_theta_min          2.09 
_diffrn_reflns_theta_max          26.78 
_reflns_number_total              7296 
_reflns_number_gt                 6404 
_reflns_threshold_expression      >2sigma(I) 
 
_computing_data_collection        'APEX2 ver. 2010.3 (Bruker AXS)' 
_computing_cell_refinement        'Saint+ ver. 7.68A (Bruker AXS)' 
_computing_data_reduction         'Saint+ ver. 7.68A (Bruker AXS)' 
_computing_structure_solution     'SHELXS-97 (Sheldrick, 1990)' 
_computing_structure_refinement   'SHELXL-97 (Sheldrick, 1997)' 
_computing_molecular_graphics     'XP ver. 5.1 (Bruker AXS, 1998)' 
_computing_publication_material   'SHELXL-97 (Sheldrick, 2008)' 
 
_refine_special_details 
; 
 Refinement of F^2^ against ALL reflections.  The weighted R-factor wR and 
 goodness of fit S are based on F^2^, conventional R-factors R are based 
 on F, with F set to zero for negative F^2^. The threshold expression of 
 F^2^ > 2sigma(F^2^) is used only for calculating R-factors(gt) etc. and is 
 not relevant to the choice of reflections for refinement.  R-factors based 
 on F^2^ are statistically about twice as large as those based on F, and R- 
 factors based on ALL data will be even larger. 
; 
 
_refine_ls_structure_factor_coef  Fsqd  
_refine_ls_matrix_type            full 
_refine_ls_weighting_scheme       calc  
_refine_ls_weighting_details 
 'calc w=1/[\s^2^(Fo^2^)+(0.0176P)^2^+2.7053P] where P=(Fo^2^+2Fc^2^)/3' 
_atom_sites_solution_primary      direct 
_atom_sites_solution_secondary    difmap 
_atom_sites_solution_hydrogens    geom 
_refine_ls_hydrogen_treatment     constr 
_refine_ls_extinction_method      none 
_refine_ls_extinction_coef        ? 
_refine_ls_number_reflns          7296 
_refine_ls_number_parameters      346 
_refine_ls_number_restraints      0 
_refine_ls_R_factor_all           0.0303 
_refine_ls_R_factor_gt            0.0229 
_refine_ls_wR_factor_ref          0.0506 
_refine_ls_wR_factor_gt           0.0479 
_refine_ls_goodness_of_fit_ref    1.054 
_refine_ls_restrained_S_all       1.054 
_refine_ls_shift/su_max           0.001 
_refine_ls_shift/su_mean          0.000 
 
loop_ 
 _atom_site_label 
 _atom_site_type_symbol 
 _atom_site_fract_x 
 _atom_site_fract_y 
 _atom_site_fract_z 
 _atom_site_U_iso_or_equiv 
 _atom_site_adp_type 
 _atom_site_occupancy 
 _atom_site_symmetry_multiplicity 
 _atom_site_calc_flag 
 _atom_site_refinement_flags 
 _atom_site_disorder_assembly 
 _atom_site_disorder_group 
Pt1_1 Pt 0.624135(9) 0.177166(6) 0.184088(7) 0.01057(4) Uani 1 1 d . . . 
Sn1_1 Sn 0.424276(17) 0.235722(11) 0.207330(12) 0.01112(5) Uani 1 1 d . . . 
V1_1 V 0.42761(4) 0.06311(3) 0.31399(3) 0.01274(11) Uani 1 1 d . . . 
P1_1 P 0.68621(7) 0.27247(4) 0.11812(5) 0.01478(17) Uani 1 1 d . . . 
P2_1 P 0.77996(7) 0.10223(4) 0.17222(5) 0.01343(16) Uani 1 1 d . . . 
C1_2 C 0.3450(3) 0.16788(16) 0.2907(2) 0.0139(6) Uani 1 1 d . . . 
C2_2 C 0.3908(3) 0.15921(17) 0.3811(2) 0.0165(7) Uani 1 1 d . . . 
H2_2 H 0.4523 0.1863 0.4147 0.020 Uiso 1 1 calc R . . 
C3_2 C 0.3304(3) 0.10410(17) 0.4128(2) 0.0195(7) Uani 1 1 d . . . 
H3_2 H 0.3442 0.0879 0.4707 0.023 Uiso 1 1 calc R . . 
C4_2 C 0.2460(3) 0.07760(17) 0.3430(2) 0.0183(7) Uani 1 1 d . . . 
H4_2 H 0.1929 0.0402 0.3453 0.022 Uiso 1 1 calc R . . 
C5_2 C 0.2549(3) 0.11676(17) 0.2690(2) 0.0169(7) Uani 1 1 d . . . 
H5_2 H 0.2075 0.1099 0.2130 0.020 Uiso 1 1 calc R . . 
C1_3 C 0.5680(2) 0.08966(16) 0.24434(19) 0.0129(6) Uani 1 1 d . . . 
C2_3 C 0.6160(2) 0.07939(17) 0.33352(19) 0.0149(6) Uani 1 1 d . . . 
H2_3 H 0.6730 0.1133 0.3584 0.018 Uiso 1 1 calc R . . 
C3_3 C 0.5937(3) 0.02717(18) 0.3920(2) 0.0191(7) Uani 1 1 d . . . 
H3_3 H 0.6375 0.0311 0.4495 0.023 Uiso 1 1 calc R . . 
C4_3 C 0.5149(3) -0.02967(17) 0.3753(2) 0.0203(7) Uani 1 1 d . . . 
H4_3 H 0.5105 -0.0582 0.4236 0.024 Uiso 1 1 calc R . . 
C5_3 C 0.4419(3) -0.04974(18) 0.2965(2) 0.0210(7) Uani 1 1 d . . . 
H5_3 H 0.3956 -0.0905 0.2979 0.025 Uiso 1 1 calc R . . 
C6_3 C 0.4293(3) -0.01676(17) 0.2164(2) 0.0184(7) Uani 1 1 d . . . 
H6_3 H 0.3764 -0.0390 0.1704 0.022 Uiso 1 1 calc R . . 
C7_3 C 0.4834(3) 0.04473(16) 0.19325(19) 0.0145(6) Uani 1 1 d . . . 
H7_3 H 0.4593 0.0580 0.1345 0.017 Uiso 1 1 calc R . . 
C1_4 C 0.2789(3) 0.23727(17) 0.08887(19) 0.0164(7) Uani 1 1 d . . . 
C2_4 C 0.2799(3) 0.16533(18) 0.0467(2) 0.0209(7) Uani 1 1 d . . . 
H2A_4 H 0.2665 0.1290 0.0872 0.031 Uiso 1 1 calc R . . 
H2B_4 H 0.3565 0.1577 0.0314 0.031 Uiso 1 1 calc R . . 
H2C_4 H 0.2174 0.1632 -0.0055 0.031 Uiso 1 1 calc R . . 
C3_4 C 0.1600(3) 0.25073(18) 0.1132(2) 0.0221(7) Uani 1 1 d . . . 
H3A_4 H 0.0966 0.2463 0.0618 0.033 Uiso 1 1 calc R . . 
H3B_4 H 0.1592 0.2980 0.1370 0.033 Uiso 1 1 calc R . . 
H3C_4 H 0.1479 0.2165 0.1565 0.033 Uiso 1 1 calc R . . 
C4_4 C 0.2951(3) 0.29207(19) 0.0217(2) 0.0230(7) Uani 1 1 d . . . 
H4A_4 H 0.3694 0.2834 0.0035 0.034 Uiso 1 1 calc R . . 
H4B_4 H 0.2968 0.3388 0.0471 0.034 Uiso 1 1 calc R . . 
H4C_4 H 0.2294 0.2890 -0.0283 0.034 Uiso 1 1 calc R . . 
C1_5 C 0.4118(3) 0.33650(17) 0.2794(2) 0.0163(7) Uani 1 1 d . . . 
C2_5 C 0.3110(3) 0.32853(17) 0.3282(2) 0.0197(7) Uani 1 1 d . . . 
H2A_5 H 0.3026 0.3720 0.3591 0.030 Uiso 1 1 calc R . . 
H2B_5 H 0.3290 0.2900 0.3696 0.030 Uiso 1 1 calc R . . 
H2C_5 H 0.2372 0.3185 0.2871 0.030 Uiso 1 1 calc R . . 
C3_5 C 0.3841(3) 0.40209(17) 0.2235(2) 0.0203(7) Uani 1 1 d . . . 
H3A_5 H 0.3128 0.3942 0.1790 0.030 Uiso 1 1 calc R . . 
H3B_5 H 0.4504 0.4124 0.1962 0.030 Uiso 1 1 calc R . . 
H3C_5 H 0.3714 0.4417 0.2597 0.030 Uiso 1 1 calc R . . 
C4_5 C 0.5267(3) 0.34685(19) 0.3461(2) 0.0229(7) Uani 1 1 d . . . 
H4A_5 H 0.5200 0.3884 0.3808 0.034 Uiso 1 1 calc R . . 
H4B_5 H 0.5921 0.3530 0.3165 0.034 Uiso 1 1 calc R . . 
H4C_5 H 0.5416 0.3058 0.3837 0.034 Uiso 1 1 calc R . . 
C1_6 C 0.5966(3) 0.35162(17) 0.1136(2) 0.0195(7) Uani 1 1 d . . . 
H1A_6 H 0.5160 0.3400 0.0818 0.023 Uiso 1 1 calc R . . 
H1B_6 H 0.5909 0.3633 0.1734 0.023 Uiso 1 1 calc R . . 
C2_6 C 0.6354(3) 0.41761(18) 0.0732(2) 0.0248(8) Uani 1 1 d . . . 
H2A_6 H 0.7142 0.4313 0.1045 0.037 Uiso 1 1 calc R . . 
H2B_6 H 0.5795 0.4555 0.0763 0.037 Uiso 1 1 calc R . . 
H2C_6 H 0.6373 0.4085 0.0127 0.037 Uiso 1 1 calc R . . 
C1_7 C 0.6951(3) 0.25876(18) 0.0052(2) 0.0200(7) Uani 1 1 d . . . 
H1A_7 H 0.6910 0.3047 -0.0239 0.024 Uiso 1 1 calc R . . 
H1B_7 H 0.7726 0.2377 0.0035 0.024 Uiso 1 1 calc R . . 
C2_7 C 0.5979(3) 0.2118(2) -0.0446(2) 0.0263(8) Uani 1 1 d . . . 
H2A_7 H 0.6018 0.1660 -0.0166 0.039 Uiso 1 1 calc R . . 
H2B_7 H 0.6086 0.2061 -0.1039 0.039 Uiso 1 1 calc R . . 
H2C_7 H 0.5209 0.2331 -0.0454 0.039 Uiso 1 1 calc R . . 
C1_8 C 0.8326(3) 0.30620(17) 0.1682(2) 0.0213(7) Uani 1 1 d . . . 
H1A_8 H 0.8909 0.2679 0.1726 0.026 Uiso 1 1 calc R . . 
H1B_8 H 0.8550 0.3430 0.1308 0.026 Uiso 1 1 calc R . . 
C2_8 C 0.8372(3) 0.3365(2) 0.2578(2) 0.0292(8) Uani 1 1 d . . . 
H2A_8 H 0.7870 0.3781 0.2531 0.044 Uiso 1 1 calc R . . 
H2B_8 H 0.9186 0.3493 0.2841 0.044 Uiso 1 1 calc R . . 
H2C_8 H 0.8088 0.3015 0.2938 0.044 Uiso 1 1 calc R . . 
C1_9 C 0.8802(3) 0.12265(18) 0.1001(2) 0.0197(7) Uani 1 1 d . . . 
H1A_9 H 0.8317 0.1328 0.0423 0.024 Uiso 1 1 calc R . . 
H1B_9 H 0.9232 0.1661 0.1212 0.024 Uiso 1 1 calc R . . 
C2_9 C 0.9714(3) 0.06719(18) 0.0898(2) 0.0231(8) Uani 1 1 d . . . 
H2A_9 H 1.0180 0.0544 0.1466 0.035 Uiso 1 1 calc R . . 
H2B_9 H 1.0237 0.0860 0.0542 0.035 Uiso 1 1 calc R . . 
H2C_9 H 0.9309 0.0257 0.0619 0.035 Uiso 1 1 calc R . . 
C1_10 C 0.8798(3) 0.08487(19) 0.2756(2) 0.0241(8) Uani 1 1 d . . . 
H1A_10 H 0.8350 0.0614 0.3141 0.029 Uiso 1 1 calc R . . 
H1B_10 H 0.9419 0.0522 0.2660 0.029 Uiso 1 1 calc R . . 
C2_10 C 0.9384(3) 0.1499(2) 0.3208(2) 0.0371(10) Uani 1 1 d . . . 
H2A_10 H 0.9893 0.1711 0.2858 0.056 Uiso 1 1 calc R . . 
H2B_10 H 0.9859 0.1369 0.3772 0.056 Uiso 1 1 calc R . . 
H2C_10 H 0.8777 0.1835 0.3285 0.056 Uiso 1 1 calc R . . 
C1_11 C 0.7338(3) 0.01365(17) 0.1376(2) 0.0231(7) Uani 1 1 d . . . 
H1A_11 H 0.8047 -0.0161 0.1430 0.028 Uiso 1 1 calc R . . 
H1B_11 H 0.6854 -0.0054 0.1768 0.028 Uiso 1 1 calc R . . 
C2_11 C 0.6631(3) 0.0094(2) 0.0453(3) 0.0361(10) Uani 1 1 d . . . 
H2A_11 H 0.5951 0.0409 0.0384 0.054 Uiso 1 1 calc R . . 
H2B_11 H 0.6356 -0.0386 0.0327 0.054 Uiso 1 1 calc R . . 
H2C_11 H 0.7131 0.0233 0.0055 0.054 Uiso 1 1 calc R . . 
 
loop_ 
 _atom_site_aniso_label 
 _atom_site_aniso_U_11 
 _atom_site_aniso_U_22 
 _atom_site_aniso_U_33 
 _atom_site_aniso_U_23 
 _atom_site_aniso_U_13 
 _atom_site_aniso_U_12 
Pt1_1 0.00912(6) 0.01117(7) 0.01203(6) -0.00039(4) 0.00361(4) -0.00079(4) 
Sn1_1 0.00948(10) 0.01193(11) 0.01228(10) 0.00069(8) 0.00307(7) 0.00057(8) 
V1_1 0.0114(3) 0.0130(3) 0.0149(2) 0.0022(2) 0.0051(2) 0.0008(2) 
P1_1 0.0133(4) 0.0127(4) 0.0200(4) 0.0002(3) 0.0073(3) -0.0017(3) 
P2_1 0.0111(4) 0.0134(4) 0.0167(4) -0.0001(3) 0.0052(3) 0.0009(3) 
C1_2 0.0101(15) 0.0154(17) 0.0168(15) 0.0024(12) 0.0042(12) 0.0041(12) 
C2_2 0.0150(16) 0.0162(17) 0.0191(16) -0.0018(13) 0.0054(13) 0.0046(13) 
C3_2 0.0214(17) 0.0218(19) 0.0181(16) 0.0039(13) 0.0106(13) 0.0050(14) 
C4_2 0.0119(16) 0.0146(17) 0.0321(18) -0.0001(14) 0.0131(13) 0.0027(13) 
C5_2 0.0120(15) 0.0212(18) 0.0181(15) 0.0040(13) 0.0046(12) 0.0022(13) 
C1_3 0.0102(14) 0.0141(16) 0.0166(14) -0.0013(12) 0.0076(11) 0.0001(12) 
C2_3 0.0079(14) 0.0193(18) 0.0188(15) 0.0031(13) 0.0055(12) 0.0001(12) 
C3_3 0.0150(16) 0.0238(19) 0.0183(15) 0.0047(14) 0.0032(12) 0.0082(14) 
C4_3 0.0205(17) 0.0181(18) 0.0255(17) 0.0076(14) 0.0120(14) 0.0074(14) 
C5_3 0.0191(17) 0.0150(18) 0.0326(19) 0.0033(14) 0.0141(14) 0.0001(13) 
C6_3 0.0144(16) 0.0167(18) 0.0261(17) -0.0046(14) 0.0086(13) -0.0018(13) 
C7_3 0.0149(15) 0.0164(17) 0.0138(14) -0.0010(12) 0.0062(12) 0.0001(13) 
C1_4 0.0145(16) 0.0186(18) 0.0158(15) -0.0002(13) 0.0025(12) 0.0008(13) 
C2_4 0.0188(17) 0.0237(19) 0.0179(16) -0.0012(14) -0.0011(13) 0.0001(14) 
C3_4 0.0149(16) 0.024(2) 0.0251(17) 0.0036(14) -0.0001(13) 0.0015(14) 
C4_4 0.0176(17) 0.027(2) 0.0224(17) 0.0067(15) 0.0005(13) 0.0023(15) 
C1_5 0.0158(16) 0.0150(17) 0.0194(16) 0.0010(13) 0.0064(13) 0.0008(13) 
C2_5 0.0237(18) 0.0166(18) 0.0215(16) 0.0003(13) 0.0110(14) 0.0036(14) 
C3_5 0.0222(17) 0.0143(18) 0.0268(17) 0.0007(14) 0.0105(14) 0.0041(14) 
C4_5 0.0228(18) 0.0219(19) 0.0232(17) -0.0077(15) 0.0031(14) -0.0022(15) 
C1_6 0.0172(17) 0.0172(18) 0.0260(17) 0.0026(14) 0.0093(13) 0.0018(14) 
C2_6 0.0242(19) 0.0161(18) 0.038(2) 0.0034(15) 0.0143(15) 0.0020(15) 
C1_7 0.0236(18) 0.0197(18) 0.0203(16) 0.0066(14) 0.0124(13) 0.0034(14) 
C2_7 0.0266(19) 0.037(2) 0.0169(16) -0.0010(15) 0.0077(14) 0.0041(17) 
C1_8 0.0172(17) 0.0142(18) 0.0338(19) -0.0023(15) 0.0081(14) -0.0022(14) 
C2_8 0.0224(19) 0.026(2) 0.038(2) -0.0103(16) 0.0036(16) -0.0063(16) 
C1_9 0.0172(17) 0.0196(18) 0.0242(17) 0.0014(14) 0.0088(13) -0.0006(14) 
C2_9 0.0173(17) 0.024(2) 0.0318(19) -0.0019(15) 0.0130(14) 0.0006(14) 
C1_10 0.0159(17) 0.034(2) 0.0229(17) 0.0042(15) 0.0042(13) 0.0119(15) 
C2_10 0.027(2) 0.054(3) 0.0249(19) -0.0134(18) -0.0066(16) 0.0080(19) 
C1_11 0.0177(17) 0.0144(18) 0.040(2) -0.0028(15) 0.0138(15) 0.0010(14) 
C2_11 0.027(2) 0.037(2) 0.044(2) -0.0206(19) 0.0062(17) -0.0067(18) 
 
_geom_special_details 
; 
 All esds (except the esd in the dihedral angle between two l.s. planes) 
 are estimated using the full covariance matrix.  The cell esds are taken 
 into account individually in the estimation of esds in distances, angles 
 and torsion angles; correlations between esds in cell parameters are only 
 used when they are defined by crystal symmetry.  An approximate (isotropic) 
 treatment of cell esds is used for estimating esds involving l.s. planes. 
; 
 
loop_ 
 _geom_bond_atom_site_label_1 
 _geom_bond_atom_site_label_2 
 _geom_bond_distance 
 _geom_bond_site_symmetry_2 
 _geom_bond_publ_flag 
Pt1_1 C1_3 2.099(3) . ? 
Pt1_1 P1_1 2.2929(8) . ? 
Pt1_1 P2_1 2.3459(8) . ? 
Pt1_1 Sn1_1 2.6699(2) . ? 
Sn1_1 C1_2 2.189(3) . ? 
Sn1_1 C1_4 2.246(3) . ? 
Sn1_1 C1_5 2.262(3) . ? 
V1_1 C2_3 2.165(3) . ? 
V1_1 C4_3 2.170(3) . ? 
V1_1 C3_3 2.172(3) . ? 
V1_1 C7_3 2.176(3) . ? 
V1_1 C6_3 2.179(3) . ? 
V1_1 C5_3 2.188(3) . ? 
V1_1 C2_2 2.211(3) . ? 
V1_1 C1_3 2.212(3) . ? 
V1_1 C1_2 2.219(3) . ? 
V1_1 C5_2 2.231(3) . ? 
V1_1 C3_2 2.257(3) . ? 
V1_1 C4_2 2.266(3) . ? 
P1_1 C1_6 1.830(3) . ? 
P1_1 C1_8 1.834(3) . ? 
P1_1 C1_7 1.835(3) . ? 
P2_1 C1_11 1.827(3) . ? 
P2_1 C1_10 1.829(3) . ? 
P2_1 C1_9 1.838(3) . ? 
C1_2 C5_2 1.421(4) . ? 
C1_2 C2_2 1.430(4) . ? 
C2_2 C3_2 1.416(5) . ? 
C2_2 H2_2 0.9500 . ? 
C3_2 C4_2 1.409(5) . ? 
C3_2 H3_2 0.9500 . ? 
C4_2 C5_2 1.416(4) . ? 
C4_2 H4_2 0.9500 . ? 
C5_2 H5_2 0.9500 . ? 
C1_3 C2_3 1.422(4) . ? 
C1_3 C7_3 1.423(4) . ? 
C2_3 C3_3 1.424(4) . ? 
C2_3 H2_3 0.9500 . ? 
C3_3 C4_3 1.410(5) . ? 
C3_3 H3_3 0.9500 . ? 
C4_3 C5_3 1.409(5) . ? 
C4_3 H4_3 0.9500 . ? 
C5_3 C6_3 1.399(5) . ? 
C5_3 H5_3 0.9500 . ? 
C6_3 C7_3 1.417(4) . ? 
C6_3 H6_3 0.9500 . ? 
C7_3 H7_3 0.9500 . ? 
C1_4 C3_4 1.531(4) . ? 
C1_4 C2_4 1.532(4) . ? 
C1_4 C4_4 1.535(4) . ? 
C2_4 H2A_4 0.9800 . ? 
C2_4 H2B_4 0.9800 . ? 
C2_4 H2C_4 0.9800 . ? 
C3_4 H3A_4 0.9800 . ? 
C3_4 H3B_4 0.9800 . ? 
C3_4 H3C_4 0.9800 . ? 
C4_4 H4A_4 0.9800 . ? 
C4_4 H4B_4 0.9800 . ? 
C4_4 H4C_4 0.9800 . ? 
C1_5 C4_5 1.531(4) . ? 
C1_5 C3_5 1.531(4) . ? 
C1_5 C2_5 1.541(4) . ? 
C2_5 H2A_5 0.9800 . ? 
C2_5 H2B_5 0.9800 . ? 
C2_5 H2C_5 0.9800 . ? 
C3_5 H3A_5 0.9800 . ? 
C3_5 H3B_5 0.9800 . ? 
C3_5 H3C_5 0.9800 . ? 
C4_5 H4A_5 0.9800 . ? 
C4_5 H4B_5 0.9800 . ? 
C4_5 H4C_5 0.9800 . ? 
C1_6 C2_6 1.526(5) . ? 
C1_6 H1A_6 0.9900 . ? 
C1_6 H1B_6 0.9900 . ? 
C2_6 H2A_6 0.9800 . ? 
C2_6 H2B_6 0.9800 . ? 
C2_6 H2C_6 0.9800 . ? 
C1_7 C2_7 1.526(5) . ? 
C1_7 H1A_7 0.9900 . ? 
C1_7 H1B_7 0.9900 . ? 
C2_7 H2A_7 0.9800 . ? 
C2_7 H2B_7 0.9800 . ? 
C2_7 H2C_7 0.9800 . ? 
C1_8 C2_8 1.526(5) . ? 
C1_8 H1A_8 0.9900 . ? 
C1_8 H1B_8 0.9900 . ? 
C2_8 H2A_8 0.9800 . ? 
C2_8 H2B_8 0.9800 . ? 
C2_8 H2C_8 0.9800 . ? 
C1_9 C2_9 1.532(4) . ? 
C1_9 H1A_9 0.9900 . ? 
C1_9 H1B_9 0.9900 . ? 
C2_9 H2A_9 0.9800 . ? 
C2_9 H2B_9 0.9800 . ? 
C2_9 H2C_9 0.9800 . ? 
C1_10 C2_10 1.522(5) . ? 
C1_10 H1A_10 0.9900 . ? 
C1_10 H1B_10 0.9900 . ? 
C2_10 H2A_10 0.9800 . ? 
C2_10 H2B_10 0.9800 . ? 
C2_10 H2C_10 0.9800 . ? 
C1_11 C2_11 1.523(5) . ? 
C1_11 H1A_11 0.9900 . ? 
C1_11 H1B_11 0.9900 . ? 
C2_11 H2A_11 0.9800 . ? 
C2_11 H2B_11 0.9800 . ? 
C2_11 H2C_11 0.9800 . ? 
 
loop_ 
 _geom_angle_atom_site_label_1 
 _geom_angle_atom_site_label_2 
 _geom_angle_atom_site_label_3 
 _geom_angle 
 _geom_angle_site_symmetry_1 
 _geom_angle_site_symmetry_3 
 _geom_angle_publ_flag 
C1_3 Pt1_1 P1_1 179.73(8) . . ? 
C1_3 Pt1_1 P2_1 82.38(8) . . ? 
P1_1 Pt1_1 P2_1 97.35(3) . . ? 
C1_3 Pt1_1 Sn1_1 84.83(8) . . ? 
P1_1 Pt1_1 Sn1_1 95.44(2) . . ? 
P2_1 Pt1_1 Sn1_1 166.91(2) . . ? 
C1_2 Sn1_1 C1_4 100.18(11) . . ? 
C1_2 Sn1_1 C1_5 96.90(11) . . ? 
C1_4 Sn1_1 C1_5 107.18(11) . . ? 
C1_2 Sn1_1 Pt1_1 108.80(8) . . ? 
C1_4 Sn1_1 Pt1_1 114.27(8) . . ? 
C1_5 Sn1_1 Pt1_1 125.26(8) . . ? 
C2_3 V1_1 C4_3 72.03(12) . . ? 
C2_3 V1_1 C3_3 38.33(11) . . ? 
C4_3 V1_1 C3_3 37.89(12) . . ? 
C2_3 V1_1 C7_3 70.79(11) . . ? 
C4_3 V1_1 C7_3 93.77(12) . . ? 
C3_3 V1_1 C7_3 93.33(11) . . ? 
C2_3 V1_1 C6_3 92.45(12) . . ? 
C4_3 V1_1 C6_3 70.86(13) . . ? 
C3_3 V1_1 C6_3 92.49(12) . . ? 
C7_3 V1_1 C6_3 37.99(12) . . ? 
C2_3 V1_1 C5_3 93.39(12) . . ? 
C4_3 V1_1 C5_3 37.72(12) . . ? 
C3_3 V1_1 C5_3 71.22(13) . . ? 
C7_3 V1_1 C5_3 71.60(12) . . ? 
C6_3 V1_1 C5_3 37.39(12) . . ? 
C2_3 V1_1 C2_2 95.92(12) . . ? 
C4_3 V1_1 C2_2 125.69(12) . . ? 
C3_3 V1_1 C2_2 103.13(12) . . ? 
C7_3 V1_1 C2_2 132.99(12) . . ? 
C6_3 V1_1 C2_2 163.16(12) . . ? 
C5_3 V1_1 C2_2 155.41(12) . . ? 
C2_3 V1_1 C1_3 37.89(11) . . ? 
C4_3 V1_1 C1_3 95.09(11) . . ? 
C3_3 V1_1 C1_3 72.47(11) . . ? 
C7_3 V1_1 C1_3 37.85(11) . . ? 
C6_3 V1_1 C1_3 71.82(11) . . ? 
C5_3 V1_1 C1_3 94.59(12) . . ? 
C2_2 V1_1 C1_3 106.68(12) . . ? 
C2_3 V1_1 C1_2 106.35(12) . . ? 
C4_3 V1_1 C1_2 163.34(12) . . ? 
C3_3 V1_1 C1_2 132.94(12) . . ? 
C7_3 V1_1 C1_2 101.38(11) . . ? 
C6_3 V1_1 C1_2 125.69(12) . . ? 
C5_3 V1_1 C1_2 155.79(12) . . ? 
C2_2 V1_1 C1_2 37.67(11) . . ? 
C1_3 V1_1 C1_2 92.69(11) . . ? 
C2_3 V1_1 C5_2 142.34(12) . . ? 
C4_3 V1_1 C5_2 145.38(12) . . ? 
C3_3 V1_1 C5_2 163.31(12) . . ? 
C7_3 V1_1 C5_2 101.88(11) . . ? 
C6_3 V1_1 C5_2 103.70(12) . . ? 
C5_3 V1_1 C5_2 120.02(12) . . ? 
C2_2 V1_1 C5_2 61.31(12) . . ? 
C1_3 V1_1 C5_2 116.15(11) . . ? 
C1_2 V1_1 C5_2 37.23(11) . . ? 
C2_3 V1_1 C3_2 119.21(12) . . ? 
C4_3 V1_1 C3_2 103.11(12) . . ? 
C3_3 V1_1 C3_2 103.15(12) . . ? 
C7_3 V1_1 C3_2 162.34(12) . . ? 
C6_3 V1_1 C3_2 144.93(12) . . ? 
C5_3 V1_1 C3_2 119.56(12) . . ? 
C2_2 V1_1 C3_2 36.94(12) . . ? 
C1_3 V1_1 C3_2 142.76(12) . . ? 
C1_2 V1_1 C3_2 62.63(11) . . ? 
C5_2 V1_1 C3_2 61.04(11) . . ? 
C2_3 V1_1 C4_2 155.11(12) . . ? 
C4_3 V1_1 C4_2 112.02(12) . . ? 
C3_3 V1_1 C4_2 132.40(12) . . ? 
C7_3 V1_1 C4_2 131.31(12) . . ? 
C6_3 V1_1 C4_2 112.23(12) . . ? 
C5_3 V1_1 C4_2 104.18(12) . . ? 
C2_2 V1_1 C4_2 61.19(12) . . ? 
C1_3 V1_1 C4_2 152.56(12) . . ? 
C1_2 V1_1 C4_2 62.36(11) . . ? 
C5_2 V1_1 C4_2 36.68(11) . . ? 
C3_2 V1_1 C4_2 36.29(12) . . ? 
C1_6 P1_1 C1_8 101.08(15) . . ? 
C1_6 P1_1 C1_7 103.22(15) . . ? 
C1_8 P1_1 C1_7 103.66(15) . . ? 
C1_6 P1_1 Pt1_1 116.46(11) . . ? 
C1_8 P1_1 Pt1_1 115.66(12) . . ? 
C1_7 P1_1 Pt1_1 114.83(11) . . ? 
C1_11 P2_1 C1_10 101.04(17) . . ? 
C1_11 P2_1 C1_9 101.19(16) . . ? 
C1_10 P2_1 C1_9 103.47(15) . . ? 
C1_11 P2_1 Pt1_1 114.14(11) . . ? 
C1_10 P2_1 Pt1_1 113.10(11) . . ? 
C1_9 P2_1 Pt1_1 121.31(11) . . ? 
C5_2 C1_2 C2_2 105.2(3) . . ? 
C5_2 C1_2 Sn1_1 130.0(2) . . ? 
C2_2 C1_2 Sn1_1 124.1(2) . . ? 
C5_2 C1_2 V1_1 71.85(18) . . ? 
C2_2 C1_2 V1_1 70.86(17) . . ? 
Sn1_1 C1_2 V1_1 114.49(13) . . ? 
C3_2 C2_2 C1_2 109.6(3) . . ? 
C3_2 C2_2 V1_1 73.29(19) . . ? 
C1_2 C2_2 V1_1 71.47(17) . . ? 
C3_2 C2_2 H2_2 125.2 . . ? 
C1_2 C2_2 H2_2 125.2 . . ? 
V1_1 C2_2 H2_2 121.7 . . ? 
C4_2 C3_2 C2_2 107.6(3) . . ? 
C4_2 C3_2 V1_1 72.22(18) . . ? 
C2_2 C3_2 V1_1 69.77(17) . . ? 
C4_2 C3_2 H3_2 126.2 . . ? 
C2_2 C3_2 H3_2 126.2 . . ? 
V1_1 C3_2 H3_2 123.5 . . ? 
C3_2 C4_2 C5_2 107.6(3) . . ? 
C3_2 C4_2 V1_1 71.49(17) . . ? 
C5_2 C4_2 V1_1 70.31(17) . . ? 
C3_2 C4_2 H4_2 126.2 . . ? 
C5_2 C4_2 H4_2 126.2 . . ? 
V1_1 C4_2 H4_2 123.7 . . ? 
C4_2 C5_2 C1_2 109.9(3) . . ? 
C4_2 C5_2 V1_1 73.01(17) . . ? 
C1_2 C5_2 V1_1 70.92(17) . . ? 
C4_2 C5_2 H5_2 125.0 . . ? 
C1_2 C5_2 H5_2 125.0 . . ? 
V1_1 C5_2 H5_2 122.6 . . ? 
C2_3 C1_3 C7_3 124.2(3) . . ? 
C2_3 C1_3 Pt1_1 118.0(2) . . ? 
C7_3 C1_3 Pt1_1 117.7(2) . . ? 
C2_3 C1_3 V1_1 69.29(16) . . ? 
C7_3 C1_3 V1_1 69.73(16) . . ? 
Pt1_1 C1_3 V1_1 137.98(15) . . ? 
C1_3 C2_3 C3_3 131.2(3) . . ? 
C1_3 C2_3 V1_1 72.82(16) . . ? 
C3_3 C2_3 V1_1 71.08(17) . . ? 
C1_3 C2_3 H2_3 114.4 . . ? 
C3_3 C2_3 H2_3 114.4 . . ? 
V1_1 C2_3 H2_3 138.6 . . ? 
C4_3 C3_3 C2_3 128.2(3) . . ? 
C4_3 C3_3 V1_1 71.01(18) . . ? 
C2_3 C3_3 V1_1 70.59(17) . . ? 
C4_3 C3_3 H3_3 115.9 . . ? 
C2_3 C3_3 H3_3 115.9 . . ? 
V1_1 C3_3 H3_3 138.9 . . ? 
C5_3 C4_3 C3_3 128.5(3) . . ? 
C5_3 C4_3 V1_1 71.80(19) . . ? 
C3_3 C4_3 V1_1 71.10(18) . . ? 
C5_3 C4_3 H4_3 115.8 . . ? 
C3_3 C4_3 H4_3 115.8 . . ? 
V1_1 C4_3 H4_3 137.0 . . ? 
C6_3 C5_3 C4_3 127.7(3) . . ? 
C6_3 C5_3 V1_1 70.97(19) . . ? 
C4_3 C5_3 V1_1 70.48(19) . . ? 
C6_3 C5_3 H5_3 116.1 . . ? 
C4_3 C5_3 H5_3 116.1 . . ? 
V1_1 C5_3 H5_3 138.6 . . ? 
C5_3 C6_3 C7_3 130.0(3) . . ? 
C5_3 C6_3 V1_1 71.6(2) . . ? 
C7_3 C6_3 V1_1 70.90(18) . . ? 
C5_3 C6_3 H6_3 115.0 . . ? 
C7_3 C6_3 H6_3 115.0 . . ? 
V1_1 C6_3 H6_3 139.4 . . ? 
C6_3 C7_3 C1_3 130.1(3) . . ? 
C6_3 C7_3 V1_1 71.11(18) . . ? 
C1_3 C7_3 V1_1 72.42(17) . . ? 
C6_3 C7_3 H7_3 115.0 . . ? 
C1_3 C7_3 H7_3 115.0 . . ? 
V1_1 C7_3 H7_3 137.8 . . ? 
C3_4 C1_4 C2_4 110.6(3) . . ? 
C3_4 C1_4 C4_4 108.0(3) . . ? 
C2_4 C1_4 C4_4 107.3(3) . . ? 
C3_4 C1_4 Sn1_1 110.4(2) . . ? 
C2_4 C1_4 Sn1_1 106.3(2) . . ? 
C4_4 C1_4 Sn1_1 114.2(2) . . ? 
C1_4 C2_4 H2A_4 109.5 . . ? 
C1_4 C2_4 H2B_4 109.5 . . ? 
H2A_4 C2_4 H2B_4 109.5 . . ? 
C1_4 C2_4 H2C_4 109.5 . . ? 
H2A_4 C2_4 H2C_4 109.5 . . ? 
H2B_4 C2_4 H2C_4 109.5 . . ? 
C1_4 C3_4 H3A_4 109.5 . . ? 
C1_4 C3_4 H3B_4 109.5 . . ? 
H3A_4 C3_4 H3B_4 109.5 . . ? 
C1_4 C3_4 H3C_4 109.5 . . ? 
H3A_4 C3_4 H3C_4 109.5 . . ? 
H3B_4 C3_4 H3C_4 109.5 . . ? 
C1_4 C4_4 H4A_4 109.5 . . ? 
C1_4 C4_4 H4B_4 109.5 . . ? 
H4A_4 C4_4 H4B_4 109.5 . . ? 
C1_4 C4_4 H4C_4 109.5 . . ? 
H4A_4 C4_4 H4C_4 109.5 . . ? 
H4B_4 C4_4 H4C_4 109.5 . . ? 
C4_5 C1_5 C3_5 109.9(3) . . ? 
C4_5 C1_5 C2_5 107.9(3) . . ? 
C3_5 C1_5 C2_5 106.5(3) . . ? 
C4_5 C1_5 Sn1_1 108.7(2) . . ? 
C3_5 C1_5 Sn1_1 115.7(2) . . ? 
C2_5 C1_5 Sn1_1 107.8(2) . . ? 
C1_5 C2_5 H2A_5 109.5 . . ? 
C1_5 C2_5 H2B_5 109.5 . . ? 
H2A_5 C2_5 H2B_5 109.5 . . ? 
C1_5 C2_5 H2C_5 109.5 . . ? 
H2A_5 C2_5 H2C_5 109.5 . . ? 
H2B_5 C2_5 H2C_5 109.5 . . ? 
C1_5 C3_5 H3A_5 109.5 . . ? 
C1_5 C3_5 H3B_5 109.5 . . ? 
H3A_5 C3_5 H3B_5 109.5 . . ? 
C1_5 C3_5 H3C_5 109.5 . . ? 
H3A_5 C3_5 H3C_5 109.5 . . ? 
H3B_5 C3_5 H3C_5 109.5 . . ? 
C1_5 C4_5 H4A_5 109.5 . . ? 
C1_5 C4_5 H4B_5 109.5 . . ? 
H4A_5 C4_5 H4B_5 109.5 . . ? 
C1_5 C4_5 H4C_5 109.5 . . ? 
H4A_5 C4_5 H4C_5 109.5 . . ? 
H4B_5 C4_5 H4C_5 109.5 . . ? 
C2_6 C1_6 P1_1 119.1(2) . . ? 
C2_6 C1_6 H1A_6 107.6 . . ? 
P1_1 C1_6 H1A_6 107.6 . . ? 
C2_6 C1_6 H1B_6 107.6 . . ? 
P1_1 C1_6 H1B_6 107.6 . . ? 
H1A_6 C1_6 H1B_6 107.0 . . ? 
C1_6 C2_6 H2A_6 109.5 . . ? 
C1_6 C2_6 H2B_6 109.5 . . ? 
H2A_6 C2_6 H2B_6 109.5 . . ? 
C1_6 C2_6 H2C_6 109.5 . . ? 
H2A_6 C2_6 H2C_6 109.5 . . ? 
H2B_6 C2_6 H2C_6 109.5 . . ? 
C2_7 C1_7 P1_1 113.8(2) . . ? 
C2_7 C1_7 H1A_7 108.8 . . ? 
P1_1 C1_7 H1A_7 108.8 . . ? 
C2_7 C1_7 H1B_7 108.8 . . ? 
P1_1 C1_7 H1B_7 108.8 . . ? 
H1A_7 C1_7 H1B_7 107.7 . . ? 
C1_7 C2_7 H2A_7 109.5 . . ? 
C1_7 C2_7 H2B_7 109.5 . . ? 
H2A_7 C2_7 H2B_7 109.5 . . ? 
C1_7 C2_7 H2C_7 109.5 . . ? 
H2A_7 C2_7 H2C_7 109.5 . . ? 
H2B_7 C2_7 H2C_7 109.5 . . ? 
C2_8 C1_8 P1_1 112.6(2) . . ? 
C2_8 C1_8 H1A_8 109.1 . . ? 
P1_1 C1_8 H1A_8 109.1 . . ? 
C2_8 C1_8 H1B_8 109.1 . . ? 
P1_1 C1_8 H1B_8 109.1 . . ? 
H1A_8 C1_8 H1B_8 107.8 . . ? 
C1_8 C2_8 H2A_8 109.5 . . ? 
C1_8 C2_8 H2B_8 109.5 . . ? 
H2A_8 C2_8 H2B_8 109.5 . . ? 
C1_8 C2_8 H2C_8 109.5 . . ? 
H2A_8 C2_8 H2C_8 109.5 . . ? 
H2B_8 C2_8 H2C_8 109.5 . . ? 
C2_9 C1_9 P2_1 117.5(2) . . ? 
C2_9 C1_9 H1A_9 107.9 . . ? 
P2_1 C1_9 H1A_9 107.9 . . ? 
C2_9 C1_9 H1B_9 107.9 . . ? 
P2_1 C1_9 H1B_9 107.9 . . ? 
H1A_9 C1_9 H1B_9 107.2 . . ? 
C1_9 C2_9 H2A_9 109.5 . . ? 
C1_9 C2_9 H2B_9 109.5 . . ? 
H2A_9 C2_9 H2B_9 109.5 . . ? 
C1_9 C2_9 H2C_9 109.5 . . ? 
H2A_9 C2_9 H2C_9 109.5 . . ? 
H2B_9 C2_9 H2C_9 109.5 . . ? 
C2_10 C1_10 P2_1 114.2(3) . . ? 
C2_10 C1_10 H1A_10 108.7 . . ? 
P2_1 C1_10 H1A_10 108.7 . . ? 
C2_10 C1_10 H1B_10 108.7 . . ? 
P2_1 C1_10 H1B_10 108.7 . . ? 
H1A_10 C1_10 H1B_10 107.6 . . ? 
C1_10 C2_10 H2A_10 109.5 . . ? 
C1_10 C2_10 H2B_10 109.5 . . ? 
H2A_10 C2_10 H2B_10 109.5 . . ? 
C1_10 C2_10 H2C_10 109.5 . . ? 
H2A_10 C2_10 H2C_10 109.5 . . ? 
H2B_10 C2_10 H2C_10 109.5 . . ? 
C2_11 C1_11 P2_1 113.8(3) . . ? 
C2_11 C1_11 H1A_11 108.8 . . ? 
P2_1 C1_11 H1A_11 108.8 . . ? 
C2_11 C1_11 H1B_11 108.8 . . ? 
P2_1 C1_11 H1B_11 108.8 . . ? 
H1A_11 C1_11 H1B_11 107.7 . . ? 
C1_11 C2_11 H2A_11 109.5 . . ? 
C1_11 C2_11 H2B_11 109.5 . . ? 
H2A_11 C2_11 H2B_11 109.5 . . ? 
C1_11 C2_11 H2C_11 109.5 . . ? 
H2A_11 C2_11 H2C_11 109.5 . . ? 
H2B_11 C2_11 H2C_11 109.5 . . ? 
 
loop_ 
 _geom_torsion_atom_site_label_1 
 _geom_torsion_atom_site_label_2 
 _geom_torsion_atom_site_label_3 
 _geom_torsion_atom_site_label_4 
 _geom_torsion 
 _geom_torsion_site_symmetry_1 
 _geom_torsion_site_symmetry_2 
 _geom_torsion_site_symmetry_3 
 _geom_torsion_site_symmetry_4 
 _geom_torsion_publ_flag 
C1_3 Pt1_1 Sn1_1 C1_2 9.65(12) . . . . ? 
P1_1 Pt1_1 Sn1_1 C1_2 -170.38(9) . . . . ? 
P2_1 Pt1_1 Sn1_1 C1_2 22.02(12) . . . . ? 
C1_3 Pt1_1 Sn1_1 C1_4 -101.34(12) . . . . ? 
P1_1 Pt1_1 Sn1_1 C1_4 78.63(9) . . . . ? 
P2_1 Pt1_1 Sn1_1 C1_4 -88.97(13) . . . . ? 
C1_3 Pt1_1 Sn1_1 C1_5 122.98(13) . . . . ? 
P1_1 Pt1_1 Sn1_1 C1_5 -57.05(10) . . . . ? 
P2_1 Pt1_1 Sn1_1 C1_5 135.35(13) . . . . ? 
P2_1 Pt1_1 P1_1 C1_6 -177.20(13) . . . . ? 
Sn1_1 Pt1_1 P1_1 C1_6 5.61(13) . . . . ? 
P2_1 Pt1_1 P1_1 C1_8 -58.70(12) . . . . ? 
Sn1_1 Pt1_1 P1_1 C1_8 124.11(12) . . . . ? 
P2_1 Pt1_1 P1_1 C1_7 62.02(12) . . . . ? 
Sn1_1 Pt1_1 P1_1 C1_7 -115.17(12) . . . . ? 
C1_3 Pt1_1 P2_1 C1_11 44.20(15) . . . . ? 
P1_1 Pt1_1 P2_1 C1_11 -135.78(13) . . . . ? 
Sn1_1 Pt1_1 P2_1 C1_11 31.78(17) . . . . ? 
C1_3 Pt1_1 P2_1 C1_10 -70.59(15) . . . . ? 
P1_1 Pt1_1 P2_1 C1_10 109.43(13) . . . . ? 
Sn1_1 Pt1_1 P2_1 C1_10 -83.01(16) . . . . ? 
C1_3 Pt1_1 P2_1 C1_9 165.63(15) . . . . ? 
P1_1 Pt1_1 P2_1 C1_9 -14.35(13) . . . . ? 
Sn1_1 Pt1_1 P2_1 C1_9 153.21(13) . . . . ? 
C1_4 Sn1_1 C1_2 C5_2 23.3(3) . . . . ? 
C1_5 Sn1_1 C1_2 C5_2 132.2(3) . . . . ? 
Pt1_1 Sn1_1 C1_2 C5_2 -96.9(3) . . . . ? 
C1_4 Sn1_1 C1_2 C2_2 -167.7(2) . . . . ? 
C1_5 Sn1_1 C1_2 C2_2 -58.8(3) . . . . ? 
Pt1_1 Sn1_1 C1_2 C2_2 72.1(3) . . . . ? 
C1_4 Sn1_1 C1_2 V1_1 109.56(15) . . . . ? 
C1_5 Sn1_1 C1_2 V1_1 -141.54(14) . . . . ? 
Pt1_1 Sn1_1 C1_2 V1_1 -10.58(15) . . . . ? 
C2_3 V1_1 C1_2 C5_2 167.82(17) . . . . ? 
C4_3 V1_1 C1_2 C5_2 -110.3(4) . . . . ? 
C3_3 V1_1 C1_2 C5_2 -159.73(18) . . . . ? 
C7_3 V1_1 C1_2 C5_2 94.71(18) . . . . ? 
C6_3 V1_1 C1_2 C5_2 62.4(2) . . . . ? 
C5_3 V1_1 C1_2 C5_2 24.4(4) . . . . ? 
C2_2 V1_1 C1_2 C5_2 -114.0(2) . . . . ? 
C1_3 V1_1 C1_2 C5_2 131.87(18) . . . . ? 
C3_2 V1_1 C1_2 C5_2 -77.30(18) . . . . ? 
C4_2 V1_1 C1_2 C5_2 -36.19(17) . . . . ? 
C2_3 V1_1 C1_2 C2_2 -78.22(19) . . . . ? 
C4_3 V1_1 C1_2 C2_2 3.7(5) . . . . ? 
C3_3 V1_1 C1_2 C2_2 -45.8(2) . . . . ? 
C7_3 V1_1 C1_2 C2_2 -151.32(18) . . . . ? 
C6_3 V1_1 C1_2 C2_2 176.38(17) . . . . ? 
C5_3 V1_1 C1_2 C2_2 138.4(3) . . . . ? 
C1_3 V1_1 C1_2 C2_2 -114.16(18) . . . . ? 
C5_2 V1_1 C1_2 C2_2 114.0(2) . . . . ? 
C3_2 V1_1 C1_2 C2_2 36.67(18) . . . . ? 
C4_2 V1_1 C1_2 C2_2 77.78(19) . . . . ? 
C2_3 V1_1 C1_2 Sn1_1 41.36(17) . . . . ? 
C4_3 V1_1 C1_2 Sn1_1 123.2(4) . . . . ? 
C3_3 V1_1 C1_2 Sn1_1 73.8(2) . . . . ? 
C7_3 V1_1 C1_2 Sn1_1 -31.74(16) . . . . ? 
C6_3 V1_1 C1_2 Sn1_1 -64.04(19) . . . . ? 
C5_3 V1_1 C1_2 Sn1_1 -102.0(3) . . . . ? 
C2_2 V1_1 C1_2 Sn1_1 119.6(2) . . . . ? 
C1_3 V1_1 C1_2 Sn1_1 5.42(15) . . . . ? 
C5_2 V1_1 C1_2 Sn1_1 -126.5(2) . . . . ? 
C3_2 V1_1 C1_2 Sn1_1 156.24(19) . . . . ? 
C4_2 V1_1 C1_2 Sn1_1 -162.64(19) . . . . ? 
C5_2 C1_2 C2_2 C3_2 0.3(3) . . . . ? 
Sn1_1 C1_2 C2_2 C3_2 -171.0(2) . . . . ? 
V1_1 C1_2 C2_2 C3_2 -63.8(2) . . . . ? 
C5_2 C1_2 C2_2 V1_1 64.1(2) . . . . ? 
Sn1_1 C1_2 C2_2 V1_1 -107.2(2) . . . . ? 
C2_3 V1_1 C2_2 C3_2 -132.72(19) . . . . ? 
C4_3 V1_1 C2_2 C3_2 -60.6(2) . . . . ? 
C3_3 V1_1 C2_2 C3_2 -94.51(19) . . . . ? 
C7_3 V1_1 C2_2 C3_2 158.10(18) . . . . ? 
C6_3 V1_1 C2_2 C3_2 107.9(4) . . . . ? 
C5_3 V1_1 C2_2 C3_2 -21.1(4) . . . . ? 
C1_3 V1_1 C2_2 C3_2 -169.85(18) . . . . ? 
C1_2 V1_1 C2_2 C3_2 118.1(3) . . . . ? 
C5_2 V1_1 C2_2 C3_2 79.01(19) . . . . ? 
C4_2 V1_1 C2_2 C3_2 36.95(18) . . . . ? 
C2_3 V1_1 C2_2 C1_2 109.20(18) . . . . ? 
C4_3 V1_1 C2_2 C1_2 -178.70(17) . . . . ? 
C3_3 V1_1 C2_2 C1_2 147.42(18) . . . . ? 
C7_3 V1_1 C2_2 C1_2 40.0(2) . . . . ? 
C6_3 V1_1 C2_2 C1_2 -10.2(5) . . . . ? 
C5_3 V1_1 C2_2 C1_2 -139.1(3) . . . . ? 
C1_3 V1_1 C2_2 C1_2 72.07(19) . . . . ? 
C5_2 V1_1 C2_2 C1_2 -39.07(17) . . . . ? 
C3_2 V1_1 C2_2 C1_2 -118.1(3) . . . . ? 
C4_2 V1_1 C2_2 C1_2 -81.13(19) . . . . ? 
C1_2 C2_2 C3_2 C4_2 -0.1(4) . . . . ? 
V1_1 C2_2 C3_2 C4_2 -62.7(2) . . . . ? 
C1_2 C2_2 C3_2 V1_1 62.7(2) . . . . ? 
C2_3 V1_1 C3_2 C4_2 173.99(18) . . . . ? 
C4_3 V1_1 C3_2 C4_2 -109.5(2) . . . . ? 
C3_3 V1_1 C3_2 C4_2 -148.4(2) . . . . ? 
C7_3 V1_1 C3_2 C4_2 53.1(5) . . . . ? 
C6_3 V1_1 C3_2 C4_2 -34.2(3) . . . . ? 
C5_3 V1_1 C3_2 C4_2 -72.7(2) . . . . ? 
C2_2 V1_1 C3_2 C4_2 117.1(3) . . . . ? 
C1_3 V1_1 C3_2 C4_2 133.3(2) . . . . ? 
C1_2 V1_1 C3_2 C4_2 79.8(2) . . . . ? 
C5_2 V1_1 C3_2 C4_2 37.34(19) . . . . ? 
C2_3 V1_1 C3_2 C2_2 56.8(2) . . . . ? 
C4_3 V1_1 C3_2 C2_2 133.39(19) . . . . ? 
C3_3 V1_1 C3_2 C2_2 94.4(2) . . . . ? 
C7_3 V1_1 C3_2 C2_2 -64.1(4) . . . . ? 
C6_3 V1_1 C3_2 C2_2 -151.3(2) . . . . ? 
C5_3 V1_1 C3_2 C2_2 170.10(18) . . . . ? 
C1_3 V1_1 C3_2 C2_2 16.2(3) . . . . ? 
C1_2 V1_1 C3_2 C2_2 -37.39(18) . . . . ? 
C5_2 V1_1 C3_2 C2_2 -79.8(2) . . . . ? 
C4_2 V1_1 C3_2 C2_2 -117.1(3) . . . . ? 
C2_2 C3_2 C4_2 C5_2 -0.2(4) . . . . ? 
V1_1 C3_2 C4_2 C5_2 -61.4(2) . . . . ? 
C2_2 C3_2 C4_2 V1_1 61.1(2) . . . . ? 
C2_3 V1_1 C4_2 C3_2 -12.5(4) . . . . ? 
C4_3 V1_1 C4_2 C3_2 82.1(2) . . . . ? 
C3_3 V1_1 C4_2 C3_2 43.7(3) . . . . ? 
C7_3 V1_1 C4_2 C3_2 -161.16(19) . . . . ? 
C6_3 V1_1 C4_2 C3_2 159.59(19) . . . . ? 
C5_3 V1_1 C4_2 C3_2 121.0(2) . . . . ? 
C2_2 V1_1 C4_2 C3_2 -37.61(19) . . . . ? 
C1_3 V1_1 C4_2 C3_2 -107.2(3) . . . . ? 
C1_2 V1_1 C4_2 C3_2 -80.6(2) . . . . ? 
C5_2 V1_1 C4_2 C3_2 -117.3(3) . . . . ? 
C2_3 V1_1 C4_2 C5_2 104.8(3) . . . . ? 
C4_3 V1_1 C4_2 C5_2 -160.58(19) . . . . ? 
C3_3 V1_1 C4_2 C5_2 161.0(2) . . . . ? 
C7_3 V1_1 C4_2 C5_2 -43.8(3) . . . . ? 
C6_3 V1_1 C4_2 C5_2 -83.1(2) . . . . ? 
C5_3 V1_1 C4_2 C5_2 -121.6(2) . . . . ? 
C2_2 V1_1 C4_2 C5_2 79.7(2) . . . . ? 
C1_3 V1_1 C4_2 C5_2 10.1(4) . . . . ? 
C1_2 V1_1 C4_2 C5_2 36.73(19) . . . . ? 
C3_2 V1_1 C4_2 C5_2 117.3(3) . . . . ? 
C3_2 C4_2 C5_2 C1_2 0.5(4) . . . . ? 
V1_1 C4_2 C5_2 C1_2 -61.7(2) . . . . ? 
C3_2 C4_2 C5_2 V1_1 62.1(2) . . . . ? 
C2_2 C1_2 C5_2 C4_2 -0.5(3) . . . . ? 
Sn1_1 C1_2 C5_2 C4_2 170.1(2) . . . . ? 
V1_1 C1_2 C5_2 C4_2 63.0(2) . . . . ? 
C2_2 C1_2 C5_2 V1_1 -63.5(2) . . . . ? 
Sn1_1 C1_2 C5_2 V1_1 107.1(2) . . . . ? 
C2_3 V1_1 C5_2 C4_2 -138.2(2) . . . . ? 
C4_3 V1_1 C5_2 C4_2 32.9(3) . . . . ? 
C3_3 V1_1 C5_2 C4_2 -56.8(5) . . . . ? 
C7_3 V1_1 C5_2 C4_2 147.88(19) . . . . ? 
C6_3 V1_1 C5_2 C4_2 108.9(2) . . . . ? 
C5_3 V1_1 C5_2 C4_2 72.4(2) . . . . ? 
C2_2 V1_1 C5_2 C4_2 -79.3(2) . . . . ? 
C1_3 V1_1 C5_2 C4_2 -174.84(19) . . . . ? 
C1_2 V1_1 C5_2 C4_2 -118.9(3) . . . . ? 
C3_2 V1_1 C5_2 C4_2 -36.95(19) . . . . ? 
C2_3 V1_1 C5_2 C1_2 -19.4(3) . . . . ? 
C4_3 V1_1 C5_2 C1_2 151.7(2) . . . . ? 
C3_3 V1_1 C5_2 C1_2 62.1(5) . . . . ? 
C7_3 V1_1 C5_2 C1_2 -93.24(18) . . . . ? 
C6_3 V1_1 C5_2 C1_2 -132.19(18) . . . . ? 
C5_3 V1_1 C5_2 C1_2 -168.70(17) . . . . ? 
C2_2 V1_1 C5_2 C1_2 39.54(17) . . . . ? 
C1_3 V1_1 C5_2 C1_2 -56.0(2) . . . . ? 
C3_2 V1_1 C5_2 C1_2 81.94(19) . . . . ? 
C4_2 V1_1 C5_2 C1_2 118.9(3) . . . . ? 
P2_1 Pt1_1 C1_3 C2_3 84.1(2) . . . . ? 
Sn1_1 Pt1_1 C1_3 C2_3 -98.7(2) . . . . ? 
P2_1 Pt1_1 C1_3 C7_3 -96.4(2) . . . . ? 
Sn1_1 Pt1_1 C1_3 C7_3 80.8(2) . . . . ? 
P2_1 Pt1_1 C1_3 V1_1 173.7(2) . . . . ? 
Sn1_1 Pt1_1 C1_3 V1_1 -9.1(2) . . . . ? 
C4_3 V1_1 C1_3 C2_3 -51.8(2) . . . . ? 
C3_3 V1_1 C1_3 C2_3 -20.97(19) . . . . ? 
C7_3 V1_1 C1_3 C2_3 -141.4(3) . . . . ? 
C6_3 V1_1 C1_3 C2_3 -119.7(2) . . . . ? 
C5_3 V1_1 C1_3 C2_3 -89.62(19) . . . . ? 
C2_2 V1_1 C1_3 C2_3 77.9(2) . . . . ? 
C1_2 V1_1 C1_3 C2_3 113.49(19) . . . . ? 
C5_2 V1_1 C1_3 C2_3 143.61(19) . . . . ? 
C3_2 V1_1 C1_3 C2_3 67.8(3) . . . . ? 
C4_2 V1_1 C1_3 C2_3 136.9(3) . . . . ? 
C2_3 V1_1 C1_3 C7_3 141.4(3) . . . . ? 
C4_3 V1_1 C1_3 C7_3 89.59(19) . . . . ? 
C3_3 V1_1 C1_3 C7_3 120.4(2) . . . . ? 
C6_3 V1_1 C1_3 C7_3 21.66(18) . . . . ? 
C5_3 V1_1 C1_3 C7_3 51.73(19) . . . . ? 
C2_2 V1_1 C1_3 C7_3 -140.76(18) . . . . ? 
C1_2 V1_1 C1_3 C7_3 -105.16(19) . . . . ? 
C5_2 V1_1 C1_3 C7_3 -75.0(2) . . . . ? 
C3_2 V1_1 C1_3 C7_3 -150.8(2) . . . . ? 
C4_2 V1_1 C1_3 C7_3 -81.7(3) . . . . ? 
C2_3 V1_1 C1_3 Pt1_1 -109.3(3) . . . . ? 
C4_3 V1_1 C1_3 Pt1_1 -161.1(2) . . . . ? 
C3_3 V1_1 C1_3 Pt1_1 -130.3(2) . . . . ? 
C7_3 V1_1 C1_3 Pt1_1 109.3(3) . . . . ? 
C6_3 V1_1 C1_3 Pt1_1 131.0(2) . . . . ? 
C5_3 V1_1 C1_3 Pt1_1 161.1(2) . . . . ? 
C2_2 V1_1 C1_3 Pt1_1 -31.4(2) . . . . ? 
C1_2 V1_1 C1_3 Pt1_1 4.2(2) . . . . ? 
C5_2 V1_1 C1_3 Pt1_1 34.3(3) . . . . ? 
C3_2 V1_1 C1_3 Pt1_1 -41.5(3) . . . . ? 
C4_2 V1_1 C1_3 Pt1_1 27.6(4) . . . . ? 
C7_3 C1_3 C2_3 C3_3 -1.3(5) . . . . ? 
Pt1_1 C1_3 C2_3 C3_3 178.1(3) . . . . ? 
V1_1 C1_3 C2_3 C3_3 43.8(3) . . . . ? 
C7_3 C1_3 C2_3 V1_1 -45.1(3) . . . . ? 
Pt1_1 C1_3 C2_3 V1_1 134.31(19) . . . . ? 
C4_3 V1_1 C2_3 C1_3 124.7(2) . . . . ? 
C3_3 V1_1 C2_3 C1_3 146.6(3) . . . . ? 
C7_3 V1_1 C2_3 C1_3 23.94(18) . . . . ? 
C6_3 V1_1 C2_3 C1_3 55.70(19) . . . . ? 
C5_3 V1_1 C2_3 C1_3 93.12(19) . . . . ? 
C2_2 V1_1 C2_3 C1_3 -109.67(19) . . . . ? 
C1_2 V1_1 C2_3 C1_3 -72.70(19) . . . . ? 
C5_2 V1_1 C2_3 C1_3 -60.6(3) . . . . ? 
C3_2 V1_1 C2_3 C1_3 -140.06(18) . . . . ? 
C4_2 V1_1 C2_3 C1_3 -131.6(3) . . . . ? 
C4_3 V1_1 C2_3 C3_3 -21.95(19) . . . . ? 
C7_3 V1_1 C2_3 C3_3 -122.7(2) . . . . ? 
C6_3 V1_1 C2_3 C3_3 -90.9(2) . . . . ? 
C5_3 V1_1 C2_3 C3_3 -53.5(2) . . . . ? 
C2_2 V1_1 C2_3 C3_3 103.7(2) . . . . ? 
C1_3 V1_1 C2_3 C3_3 -146.6(3) . . . . ? 
C1_2 V1_1 C2_3 C3_3 140.69(19) . . . . ? 
C5_2 V1_1 C2_3 C3_3 152.8(2) . . . . ? 
C3_2 V1_1 C2_3 C3_3 73.3(2) . . . . ? 
C4_2 V1_1 C2_3 C3_3 81.8(3) . . . . ? 
C1_3 C2_3 C3_3 C4_3 -0.2(6) . . . . ? 
V1_1 C2_3 C3_3 C4_3 44.2(3) . . . . ? 
C1_3 C2_3 C3_3 V1_1 -44.3(3) . . . . ? 
C2_3 V1_1 C3_3 C4_3 -144.6(3) . . . . ? 
C7_3 V1_1 C3_3 C4_3 -91.86(19) . . . . ? 
C6_3 V1_1 C3_3 C4_3 -53.83(19) . . . . ? 
C5_3 V1_1 C3_3 C4_3 -22.57(18) . . . . ? 
C2_2 V1_1 C3_3 C4_3 132.51(18) . . . . ? 
C1_3 V1_1 C3_3 C4_3 -123.9(2) . . . . ? 
C1_2 V1_1 C3_3 C4_3 159.23(18) . . . . ? 
C5_2 V1_1 C3_3 C4_3 112.3(4) . . . . ? 
C3_2 V1_1 C3_3 C4_3 94.54(19) . . . . ? 
C4_2 V1_1 C3_3 C4_3 69.7(2) . . . . ? 
C4_3 V1_1 C3_3 C2_3 144.6(3) . . . . ? 
C7_3 V1_1 C3_3 C2_3 52.8(2) . . . . ? 
C6_3 V1_1 C3_3 C2_3 90.80(19) . . . . ? 
C5_3 V1_1 C3_3 C2_3 122.1(2) . . . . ? 
C2_2 V1_1 C3_3 C2_3 -82.9(2) . . . . ? 
C1_3 V1_1 C3_3 C2_3 20.76(18) . . . . ? 
C1_2 V1_1 C3_3 C2_3 -56.1(2) . . . . ? 
C5_2 V1_1 C3_3 C2_3 -103.0(4) . . . . ? 
C3_2 V1_1 C3_3 C2_3 -120.83(19) . . . . ? 
C4_2 V1_1 C3_3 C2_3 -145.66(19) . . . . ? 
C2_3 C3_3 C4_3 C5_3 2.1(5) . . . . ? 
V1_1 C3_3 C4_3 C5_3 46.1(3) . . . . ? 
C2_3 C3_3 C4_3 V1_1 -44.0(3) . . . . ? 
C2_3 V1_1 C4_3 C5_3 -121.4(2) . . . . ? 
C3_3 V1_1 C4_3 C5_3 -143.6(3) . . . . ? 
C7_3 V1_1 C4_3 C5_3 -52.98(19) . . . . ? 
C6_3 V1_1 C4_3 C5_3 -22.18(18) . . . . ? 
C2_2 V1_1 C4_3 C5_3 154.32(18) . . . . ? 
C1_3 V1_1 C4_3 C5_3 -90.92(19) . . . . ? 
C1_2 V1_1 C4_3 C5_3 151.6(4) . . . . ? 
C5_2 V1_1 C4_3 C5_3 64.3(3) . . . . ? 
C3_2 V1_1 C4_3 C5_3 121.79(19) . . . . ? 
C4_2 V1_1 C4_3 C5_3 84.8(2) . . . . ? 
C2_3 V1_1 C4_3 C3_3 22.17(18) . . . . ? 
C7_3 V1_1 C4_3 C3_3 90.58(19) . . . . ? 
C6_3 V1_1 C4_3 C3_3 121.4(2) . . . . ? 
C5_3 V1_1 C4_3 C3_3 143.6(3) . . . . ? 
C2_2 V1_1 C4_3 C3_3 -62.1(2) . . . . ? 
C1_3 V1_1 C4_3 C3_3 52.64(19) . . . . ? 
C1_2 V1_1 C4_3 C3_3 -64.9(5) . . . . ? 
C5_2 V1_1 C4_3 C3_3 -152.1(2) . . . . ? 
C3_2 V1_1 C4_3 C3_3 -94.65(19) . . . . ? 
C4_2 V1_1 C4_3 C3_3 -131.66(18) . . . . ? 
C3_3 C4_3 C5_3 C6_3 -1.2(6) . . . . ? 
V1_1 C4_3 C5_3 C6_3 44.6(3) . . . . ? 
C3_3 C4_3 C5_3 V1_1 -45.9(3) . . . . ? 
C2_3 V1_1 C5_3 C6_3 -89.60(19) . . . . ? 
C4_3 V1_1 C5_3 C6_3 -144.0(3) . . . . ? 
C3_3 V1_1 C5_3 C6_3 -121.4(2) . . . . ? 
C7_3 V1_1 C5_3 C6_3 -21.13(18) . . . . ? 
C2_2 V1_1 C5_3 C6_3 158.2(3) . . . . ? 
C1_3 V1_1 C5_3 C6_3 -51.64(19) . . . . ? 
C1_2 V1_1 C5_3 C6_3 55.4(4) . . . . ? 
C5_2 V1_1 C5_3 C6_3 72.2(2) . . . . ? 
C3_2 V1_1 C5_3 C6_3 143.85(18) . . . . ? 
C4_2 V1_1 C5_3 C6_3 108.18(19) . . . . ? 
C2_3 V1_1 C5_3 C4_3 54.43(19) . . . . ? 
C3_3 V1_1 C5_3 C4_3 22.66(17) . . . . ? 
C7_3 V1_1 C5_3 C4_3 122.9(2) . . . . ? 
C6_3 V1_1 C5_3 C4_3 144.0(3) . . . . ? 
C2_2 V1_1 C5_3 C4_3 -57.7(4) . . . . ? 
C1_3 V1_1 C5_3 C4_3 92.39(19) . . . . ? 
C1_2 V1_1 C5_3 C4_3 -160.6(3) . . . . ? 
C5_2 V1_1 C5_3 C4_3 -143.75(18) . . . . ? 
C3_2 V1_1 C5_3 C4_3 -72.1(2) . . . . ? 
C4_2 V1_1 C5_3 C4_3 -107.79(19) . . . . ? 
C4_3 C5_3 C6_3 C7_3 -1.2(6) . . . . ? 
V1_1 C5_3 C6_3 C7_3 43.3(3) . . . . ? 
C4_3 C5_3 C6_3 V1_1 -44.4(3) . . . . ? 
C2_3 V1_1 C6_3 C5_3 92.37(19) . . . . ? 
C4_3 V1_1 C6_3 C5_3 22.36(18) . . . . ? 
C3_3 V1_1 C6_3 C5_3 54.01(19) . . . . ? 
C7_3 V1_1 C6_3 C5_3 146.2(3) . . . . ? 
C2_2 V1_1 C6_3 C5_3 -147.8(4) . . . . ? 
C1_3 V1_1 C6_3 C5_3 124.6(2) . . . . ? 
C1_2 V1_1 C6_3 C5_3 -155.44(18) . . . . ? 
C5_2 V1_1 C6_3 C5_3 -121.93(19) . . . . ? 
C3_2 V1_1 C6_3 C5_3 -63.3(3) . . . . ? 
C4_2 V1_1 C6_3 C5_3 -84.3(2) . . . . ? 
C2_3 V1_1 C6_3 C7_3 -53.86(19) . . . . ? 
C4_3 V1_1 C6_3 C7_3 -123.9(2) . . . . ? 
C3_3 V1_1 C6_3 C7_3 -92.22(19) . . . . ? 
C5_3 V1_1 C6_3 C7_3 -146.2(3) . . . . ? 
C2_2 V1_1 C6_3 C7_3 66.0(5) . . . . ? 
C1_3 V1_1 C6_3 C7_3 -21.59(17) . . . . ? 
C1_2 V1_1 C6_3 C7_3 58.3(2) . . . . ? 
C5_2 V1_1 C6_3 C7_3 91.83(19) . . . . ? 
C3_2 V1_1 C6_3 C7_3 150.5(2) . . . . ? 
C4_2 V1_1 C6_3 C7_3 129.45(18) . . . . ? 
C5_3 C6_3 C7_3 C1_3 1.7(6) . . . . ? 
V1_1 C6_3 C7_3 C1_3 45.2(3) . . . . ? 
C5_3 C6_3 C7_3 V1_1 -43.5(3) . . . . ? 
C2_3 C1_3 C7_3 C6_3 0.2(5) . . . . ? 
Pt1_1 C1_3 C7_3 C6_3 -179.2(3) . . . . ? 
V1_1 C1_3 C7_3 C6_3 -44.8(3) . . . . ? 
C2_3 C1_3 C7_3 V1_1 45.0(3) . . . . ? 
Pt1_1 C1_3 C7_3 V1_1 -134.47(18) . . . . ? 
C2_3 V1_1 C7_3 C6_3 121.3(2) . . . . ? 
C4_3 V1_1 C7_3 C6_3 51.82(19) . . . . ? 
C3_3 V1_1 C7_3 C6_3 89.78(19) . . . . ? 
C5_3 V1_1 C7_3 C6_3 20.83(18) . . . . ? 
C2_2 V1_1 C7_3 C6_3 -158.80(18) . . . . ? 
C1_3 V1_1 C7_3 C6_3 145.3(3) . . . . ? 
C1_2 V1_1 C7_3 C6_3 -135.16(18) . . . . ? 
C5_2 V1_1 C7_3 C6_3 -97.12(19) . . . . ? 
C3_2 V1_1 C7_3 C6_3 -111.2(4) . . . . ? 
C4_2 V1_1 C7_3 C6_3 -72.1(2) . . . . ? 
C2_3 V1_1 C7_3 C1_3 -23.96(18) . . . . ? 
C4_3 V1_1 C7_3 C1_3 -93.45(19) . . . . ? 
C3_3 V1_1 C7_3 C1_3 -55.49(19) . . . . ? 
C6_3 V1_1 C7_3 C1_3 -145.3(3) . . . . ? 
C5_3 V1_1 C7_3 C1_3 -124.4(2) . . . . ? 
C2_2 V1_1 C7_3 C1_3 55.9(2) . . . . ? 
C1_2 V1_1 C7_3 C1_3 79.57(19) . . . . ? 
C5_2 V1_1 C7_3 C1_3 117.61(18) . . . . ? 
C3_2 V1_1 C7_3 C1_3 103.6(4) . . . . ? 
C4_2 V1_1 C7_3 C1_3 142.62(19) . . . . ? 
C1_2 Sn1_1 C1_4 C3_4 46.9(2) . . . . ? 
C1_5 Sn1_1 C1_4 C3_4 -53.6(2) . . . . ? 
Pt1_1 Sn1_1 C1_4 C3_4 163.03(19) . . . . ? 
C1_2 Sn1_1 C1_4 C2_4 -73.1(2) . . . . ? 
C1_5 Sn1_1 C1_4 C2_4 -173.6(2) . . . . ? 
Pt1_1 Sn1_1 C1_4 C2_4 43.1(2) . . . . ? 
C1_2 Sn1_1 C1_4 C4_4 168.9(2) . . . . ? 
C1_5 Sn1_1 C1_4 C4_4 68.3(2) . . . . ? 
Pt1_1 Sn1_1 C1_4 C4_4 -75.0(2) . . . . ? 
C1_2 Sn1_1 C1_5 C4_5 92.2(2) . . . . ? 
C1_4 Sn1_1 C1_5 C4_5 -164.9(2) . . . . ? 
Pt1_1 Sn1_1 C1_5 C4_5 -26.7(3) . . . . ? 
C1_2 Sn1_1 C1_5 C3_5 -143.6(2) . . . . ? 
C1_4 Sn1_1 C1_5 C3_5 -40.7(2) . . . . ? 
Pt1_1 Sn1_1 C1_5 C3_5 97.5(2) . . . . ? 
C1_2 Sn1_1 C1_5 C2_5 -24.6(2) . . . . ? 
C1_4 Sn1_1 C1_5 C2_5 78.3(2) . . . . ? 
Pt1_1 Sn1_1 C1_5 C2_5 -143.48(17) . . . . ? 
C1_8 P1_1 C1_6 C2_6 51.9(3) . . . . ? 
C1_7 P1_1 C1_6 C2_6 -55.2(3) . . . . ? 
Pt1_1 P1_1 C1_6 C2_6 178.0(2) . . . . ? 
C1_6 P1_1 C1_7 C2_7 -91.5(3) . . . . ? 
C1_8 P1_1 C1_7 C2_7 163.4(2) . . . . ? 
Pt1_1 P1_1 C1_7 C2_7 36.3(3) . . . . ? 
C1_6 P1_1 C1_8 C2_8 60.6(3) . . . . ? 
C1_7 P1_1 C1_8 C2_8 167.3(3) . . . . ? 
Pt1_1 P1_1 C1_8 C2_8 -66.1(3) . . . . ? 
C1_11 P2_1 C1_9 C2_9 -46.5(3) . . . . ? 
C1_10 P2_1 C1_9 C2_9 57.9(3) . . . . ? 
Pt1_1 P2_1 C1_9 C2_9 -173.9(2) . . . . ? 
C1_11 P2_1 C1_10 C2_10 177.8(3) . . . . ? 
C1_9 P2_1 C1_10 C2_10 73.3(3) . . . . ? 
Pt1_1 P2_1 C1_10 C2_10 -59.8(3) . . . . ? 
C1_10 P2_1 C1_11 C2_11 -171.1(3) . . . . ? 
C1_9 P2_1 C1_11 C2_11 -64.8(3) . . . . ? 
Pt1_1 P2_1 C1_11 C2_11 67.2(3) . . . . ? 
 
_diffrn_measured_fraction_theta_max    0.991 
_diffrn_reflns_theta_full              26.00 
_diffrn_measured_fraction_theta_full   0.993 
_refine_diff_density_max    1.098 
_refine_diff_density_min   -1.031 
_refine_diff_density_rms    0.118 


########################################################
